# Supplementary material for: Quercetin improves epithelial regeneration from airway basal cells of COPD patients
Source: Springer Nature journal article supplement (doi:10.1186/s12931-024-02742-0), 2024-03-11
Supplement: 12931_2024_2742_MOESM1_ESM.pdf [file 12931_2024_2742_MOESM1_ESM.pdf]

Supplemental data

**Quercetin improves epithelial regeneration from airway basal cells of COPD patients**

Elizabeth S. McCluskey<sup>1</sup>, Nathan Liu<sup>1</sup>, Abhimanu Pandey<sup>1</sup>, Nathaniel Marchetti<sup>3</sup>, Steven G Kelsen<sup>3</sup> and Umadevi S. Sajjan<sup>1,2,3</sup>

## Supplemental Figure Legends

Supplemental Figure 1. Optimization of quercetin dose and time of culture at ALI for TER measurements. Ninety % confluent BC from one COPD patient were treated with vehicle or 01, 1 and 5  $\mu$ M quercetin for 3 days. The cells were then cultured at ALI up to 10 days and TER was monitored on days 4, 6, 8 and 10. BC from one healthy non-smoker was cultured similarly without treatment with DMSO or quercetin. **The experiment was repeated three times using P1 cells. For each experiment, cells at P0 were thawed grown to 80% confluence on 10 cm dish, dissociated from the plate and seeded in transwells.** The data represent mean  $\pm$  SEM calculated from 3 independent experiments and **the statistical significance was determined by ANOVA with Tukey post-hoc analysis** (\* $p \leq 0.05$ , different from normal; #  $p \leq 0.05$ , different from COPD cells treated with 1  $\mu$ M quercetin).

Supplemental Figure 2. Detection of Ciliated, goblet and basal cells in mucociliary-differentiated normal and COPD cultures. Basal cells obtained 6 COPD patients were grown to 90% confluency and treated with DMSO or 1  $\mu$ M quercetin for three days. The cells were then cultured at ALI for 4 weeks to promote mucociliary differentiation. BC obtained from 6 healthy non-smokers cultured at ALI for 4 weeks were used as controls. The cells were dissociated from the transwells, stained with Zombie to detect dead cells, fixed/permeabilized, blocked with 5% BSA and incubated with antibodies to acetylated tubulin (ciliated cells), MUC5AC (goblet cells) or TP63 (basal cells) or normal mouse IgG (control to detect FITC positive cells). Cells were then washed to remove unbound antibodies and then incubated with antimouse IgG labeled with FITC and analyzed by flow cytometry. The cells were selected on the basis of forward and side scatter, dead cells were gated out based on Zombie staining and live cells were gated on the basis of FITC positivity. The data in Panel A shows gating strategy used for cells incubated with

normal mouse IgG (negative control). Panel B to D shows live cells gated on the basis of FITC positivity.

Supplemental Figure 3. Differential expression of genes by microarray in COPD BC treated with quercetin. COPD BC were treated with placebo or quercetin for 3 consecutive days, total RNA was isolated and subjected to microarray analysis using Human Gene 2.1 ST arrays. The data was analyzed by TAC software analysis to identify the number of altered genes at least by 2 fold with FDR p value <0.05.

Table 1. Study population

| Subject           | Age       | Sex        | Pack-years   | FEV1% predicted |
|-------------------|-----------|------------|--------------|-----------------|
| <b>Normal (8)</b> | <b>50</b> | <b>4:4</b> |              |                 |
| N4                | 59        | F          | -            | -               |
| N17               | 33        | M          | -            | -               |
| N18               | 16        | M          | -            | -               |
| N19               | 50        | F          | -            | -               |
| N20               | 52        | M          | -            | -               |
| N22               | 62        | M          | -            | -               |
| N24               | 50        | F          | -            | -               |
| N27               | 48        | F          | -            | -               |
| <b>COPD (8)</b>   | <b>54</b> | <b>5:3</b> | <b>41.25</b> | <b>17</b>       |
| C6                | 49        | F          | 25           | 17              |
| C10               | 53        | F          | 37.5         | 14              |
| C11               | 59        | M          | 70           | 22              |
| C12               | 49        | F          | 136          | 13              |
| C14               | 55        | M          | 25           | 17              |
| C15               | 45        | M          | 31.25        | 17              |
| C18               | 67        | M          | 90           | 20              |
| C19               | 64        | M          | 45           | 29              |

Supplemental Table 2: Characteristics of patients treated with Placebo or Quercetin

| Characteristics       | Placebo group       | Quercetin group     | P Value |
|-----------------------|---------------------|---------------------|---------|
| Age yr, mean $\pm$ SD | 67.7 ( $\pm$ 4.99)  | 67.4 ( $\pm$ 63.9)  | 0.201   |
| Total (Males)         | 4 (2)               | 7 (3)               | 0.331   |
| FEV1 (% of predicted) | 57.5 ( $\pm$ 10.24) | 53.7 ( $\pm$ 12.29) | 0.476   |
| FEV1/FVC              | 0.61 ( $\pm$ 0.11)  | 0.55 ( $\pm$ 0.08)  | 0.345   |

**Supplemental Table 4. Top 10 enriched Biological Process terms for downregulated genes in COPD-Q group**

| Gene Set   | Description                              | Size | Expect | Ratio  | P Value  | FDR      |
|------------|------------------------------------------|------|--------|--------|----------|----------|
| GO:0007049 | Cell cycle                               | 1661 | 41.123 | 4.0124 | <2.2e-16 | <2.2e-16 |
| GO:0022402 | Cell cycle process                       | 1219 | 2.7787 | 9.3569 | <2.2e-16 | <2.2e-16 |
| GO:0051726 | Regulation of cell cycle                 | 1050 | 10.224 | 4.3038 | <2.2e-16 | <2.2e-16 |
| GO:0006259 | DNA metabolic process                    | 932  | 7.3400 | 5.0409 | <2.2e-16 | <2.2e-16 |
| GO:0000278 | Mitotic cell cycle                       | 885  | 8.6769 | 4.6100 | <2.2e-16 | <2.2e-16 |
| GO:0006974 | Cellular response to DNA damage stimulus | 767  | 5.5050 | 5.6313 | <2.2e-16 | <2.2e-16 |
| GO:0007346 | Regulation of mitotic cell cycle         | 552  | 18.664 | 3.0539 | <2.2e-16 | <2.2e-16 |
| GO:0045786 | Negative regulation of cell cycle        | 537  | 30.566 | 2.2247 | <2.2e-16 | <2.2e-16 |
| GO:0006281 | DNA repair                               | 489  | 48.208 | 1.9084 | <2.2e-16 | <2.2e-16 |
| GO:0006260 | DNA replication                          | 259  | 6.4123 | 8.7333 | <2.2e-16 | <2.2e-16 |

| Supplemental Table3. CP vs CQ pairwise comparison |            |            |           |           |           |          |           |                 |                                                                              |
|---------------------------------------------------|------------|------------|-----------|-----------|-----------|----------|-----------|-----------------|------------------------------------------------------------------------------|
| ID                                                | C_Q Avg (I | C Avg (log | C_Q Stand | C Standar | Fold Chan | P-val    | FDR P-val | Gene Symbol     | Description                                                                  |
| 16872611                                          | 9.05       | 1.42       | 0.93      | 1.06      | 197.91    | 1.03E-11 | 4.52E-08  | CEACAM7         | carcinoembryonic antigen-related cell adhesion molecule 7                    |
| 16949322                                          | 9          | 1.93       | 1.78      | 1.26      | 135       | 6.20E-08 | 8.80E-06  | FETUB           | fetuin B                                                                     |
| 16872777                                          | 11.18      | 4.39       | 0.86      | 1.23      | 110.52    | 9.69E-11 | 1.90E-07  | CNFN            | cornifelin                                                                   |
| 16910766                                          | 10.4       | 3.83       | 1.69      | 1.68      | 94.73     | 3.06E-07 | 2.59E-05  | TGM3            | transglutaminase 3                                                           |
| 16693323                                          | 10.84      | 4.46       | 0.98      | 1.43      | 83.31     | 3.39E-09 | 1.27E-06  | CRNN            | cornulin                                                                     |
| 17122142                                          | 9.6        | 3.63       | 3.13      | 1.94      | 62.67     | 0.0009   | 0.0104    |                 |                                                                              |
| 16840799                                          | 8.22       | 2.38       | 0.76      | 1.3       | 57.12     | 9.45E-10 | 6.24E-07  | ALOX12B         | arachidonate 12-lipoxygenase, 12R type                                       |
| 17025738                                          | 7.09       | 1.32       | 1.5       | 0.71      | 54.62     | 2.07E-08 | 4.23E-06  | LOC441178; LOC1 | uncharacterized LOC441178; uncharacterized LOC105378132                      |
| 16924785                                          | 6.96       | 1.23       | 1.28      | 0.52      | 53.32     | 4.91E-10 | 4.02E-07  | CLDN17          | claudin 17                                                                   |
| 17081945                                          | 8.97       | 3.24       | 1.36      | 0.95      | 53.05     | 1.26E-08 | 3.15E-06  | SLURP1          | secreted LY6/PLAUR domain containing 1                                       |
| 16882834                                          | 9.51       | 3.79       | 1.09      | 0.9       | 52.8      | 3.70E-10 | 3.52E-07  | MAL             | mal, T-cell differentiation protein                                          |
| 16976488                                          | 8.9        | 3.36       | 1.63      | 0.75      | 46.6      | 4.43E-08 | 7.08E-06  | TMPRSS11B       | transmembrane protease, serine 11B                                           |
| 16874751                                          | 8.06       | 3          | 1.5       | 0.96      | 33.35     | 6.29E-08 | 8.90E-06  | KLK12           | kallikrein related peptidase 12                                              |
| 16851708                                          | 7.58       | 2.61       | 0.94      | 1.81      | 31.51     | 4.34E-07 | 3.38E-05  | DSG1            | desmoglein 1                                                                 |
| 16868453                                          | 10.17      | 5.35       | 1.07      | 1.08      | 28.27     | 4.64E-08 | 7.36E-06  | ZNF812P         | zinc finger protein 812, pseudogene                                          |
| 16852849                                          | 7.51       | 2.82       | 0.73      | 1.42      | 25.75     | 9.40E-08 | 1.15E-05  | SERPINB11       | serpin peptidase inhibitor, clade B (ovalbumin), member 11 (gene/pseudogene) |
| 16773260                                          | 9.77       | 5.09       | 0.97      | 1.25      | 25.62     | 3.12E-08 | 5.47E-06  | ATP12A          | ATPase, H+/K+ transporting, nongastric, alpha polypeptide                    |
| 16990787                                          | 9.69       | 5.02       | 0.87      | 1.39      | 25.46     | 4.10E-08 | 6.73E-06  | SPINK7          | serine peptidase inhibitor, Kazal type 7 (putative)                          |
| 17038014                                          | 8.46       | 3.9        | 1.11      | 1.61      | 23.54     | 2.61E-06 | 0.0001    |                 |                                                                              |
| 16884602                                          | 5.81       | 1.31       | 1.6       | 0.32      | 22.67     | 4.00E-08 | 6.58E-06  | IL36A           | interleukin 36, alpha                                                        |
| 17033237                                          | 7.64       | 3.19       | 1.16      | 1.36      | 21.9      | 1.12E-06 | 6.37E-05  |                 |                                                                              |
| 16699560                                          | 7.78       | 3.33       | 1.13      | 1.24      | 21.81     | 7.60E-07 | 4.84E-05  |                 |                                                                              |
| 16872978                                          | 5.91       | 1.46       | 1.58      | 0.52      | 21.73     | 5.32E-07 | 3.72E-05  |                 |                                                                              |
| 16871349                                          | 7.32       | 2.89       | 0.89      | 0.89      | 21.59     | 1.73E-09 | 8.59E-07  | KRTDAP          | keratinocyte differentiation-associated protein                              |
| 16844477                                          | 9.55       | 5.13       | 0.8       | 1.42      | 21.44     | 9.54E-08 | 1.16E-05  | KRT10           | keratin 10, type I                                                           |
| 17006532                                          | 7.7        | 3.32       | 1.09      | 1.42      | 20.86     | 1.53E-06 | 7.96E-05  | MUC21           | mucin 21, cell surface associated                                            |
| 17026232                                          | 7.7        | 3.32       | 1.09      | 1.42      | 20.86     | 1.53E-06 | 7.96E-05  |                 |                                                                              |
| 17030532                                          | 7.7        | 3.32       | 1.09      | 1.42      | 20.86     | 1.53E-06 | 7.96E-05  |                 |                                                                              |
| 16871403                                          | 9.18       | 4.8        | 0.68      | 1.3       | 20.77     | 2.14E-08 | 4.30E-06  | SBSN            | suprabasin                                                                   |
| 17035325                                          | 7.91       | 3.57       | 1.08      | 1.38      | 20.29     | 1.57E-06 | 8.08E-05  |                 |                                                                              |
| 16862790                                          | 7.17       | 2.88       | 1.72      | 0.68      | 19.64     | 3.13E-06 | 0.0001    | CD177           | CD177 molecule                                                               |
| 16914171                                          | 11.57      | 7.33       | 0.29      | 1.1       | 18.97     | 3.55E-09 | 1.29E-06  | PI3             | peptidase inhibitor 3, skin-derived                                          |
| 17014712                                          | 7.54       | 3.37       | 1.08      | 1.02      | 18.05     | 4.17E-07 | 3.19E-05  |                 |                                                                              |
| 17002429                                          | 7.91       | 3.84       | 0.68      | 1.26      | 16.79     | 1.50E-07 | 1.58E-05  | ATP10B          | ATPase, class V, type 10B                                                    |
| 17123812                                          | 5.4        | 1.34       | 1.39      | 0.47      | 16.67     | 4.66E-07 | 3.42E-05  |                 |                                                                              |
| 16761549                                          | 5.97       | 2.04       | 1.57      | 0.63      | 15.27     | 1.36E-06 | 7.29E-05  | PRB1            | proline-rich protein BstNI subfamily 1                                       |
| 16976455                                          | 6.35       | 2.45       | 1.05      | 0.93      | 14.96     | 2.67E-07 | 2.36E-05  | TMPRSS11A       | transmembrane protease, serine 11A                                           |
| 17001349                                          | 4.95       | 1.06       | 1.55      | 0.13      | 14.87     | 3.77E-06 | 0.0002    | SPINK1          | serine peptidase inhibitor, Kazal type 1                                     |
| 16852824                                          | 6.7        | 2.83       | 0.86      | 1.05      | 14.68     | 1.33E-07 | 1.46E-05  | SERPINB12       | serpin peptidase inhibitor, clade B (ovalbumin), member 12                   |
| 17123802                                          | 5.35       | 1.49       | 1.36      | 0.45      | 14.58     | 5.96E-07 | 4.01E-05  |                 |                                                                              |
| 16830238                                          | 5          | 1.15       | 1.66      | 0.32      | 14.45     | 3.21E-06 | 0.0001    | ALOX12          | arachidonate 12-lipoxygenase                                                 |
| 17081951                                          | 5.84       | 2.03       | 1.47      | 0.2       | 14        | 1.06E-06 | 6.14E-05  | LYPD2           | LY6/PLAUR domain containing 2                                                |
| 16765080                                          | 10.15      | 6.35       | 0.85      | 1.09      | 13.93     | 3.17E-07 | 2.64E-05  | KRT4            | keratin 4, type II                                                           |
| 16793299                                          | 7.81       | 4.04       | 0.85      | 0.63      | 13.65     | 1.43E-08 | 3.32E-06  | LINC00520       | long intergenic non-protein coding RNA 520                                   |
| 17123836                                          | 5.47       | 1.74       | 1.18      | 1.1       | 13.26     | 2.85E-06 | 0.0001    |                 |                                                                              |
| 16699550                                          | 4.23       | 0.61       | 0.74      | 0.37      | 12.31     | 1.44E-10 | 2.25E-07  |                 |                                                                              |
| 16699552                                          | 4.96       | 1.39       | 0.84      | 0.44      | 11.88     | 3.05E-09 | 1.20E-06  | LOC105372950    | uncharacterized LOC105372950                                                 |
| 16705216                                          | 6.38       | 2.82       | 0.61      | 0.77      | 11.76     | 1.06E-09 | 6.79E-07  | LOC105378325    | uncharacterized LOC105378325                                                 |
| 16765116                                          | 5.04       | 1.52       | 1.45      | 0.37      | 11.52     | 1.65E-06 | 8.41E-05  | KRT78           | keratin 78, type II                                                          |
| 16955580                                          | 6.21       | 2.7        | 0.95      | 0.82      | 11.41     | 1.53E-07 | 1.59E-05  | FAM3D           | family with sequence similarity 3, member D                                  |
| 16693427                                          | 5.68       | 2.2        | 0.72      | 0.84      | 11.14     | 5.23E-08 | 7.86E-06  | S100A7          | S100 calcium binding protein A7                                              |
| 16874798                                          | 8.1        | 4.62       | 0.6       | 0.9       | 11.1      | 1.44E-08 | 3.33E-06  | VSIG10L         | V-set and immunoglobulin domain containing 10 like                           |
| 16976483                                          | 5.46       | 2.02       | 1.01      | 0.8       | 10.9      | 5.76E-07 | 3.90E-05  | TMPRSS11BNL     | TMPRSS11B N-terminal like, pseudogene                                        |
| 17109142                                          | 4.6        | 1.17       | 1.73      | 0.47      | 10.82     | 0.0001   | 0.0021    |                 |                                                                              |
| 16693383                                          | 6.61       | 3.18       | 0.67      | 0.92      | 10.77     | 2.29E-08 | 4.38E-06  | PGLYRP3         | peptidoglycan recognition protein 3                                          |
| 16761693                                          | 7.37       | 3.97       | 1.39      | 1.36      | 10.61     | 7.65E-05 | 0.0015    | LINC01559       | long intergenic non-protein coding RNA 1559                                  |
| 16990321                                          | 4.69       | 1.33       | 0.82      | 0.88      | 10.28     | 3.53E-07 | 2.86E-05  | PCDH14          | protocadherin beta 14                                                        |
| 16716507                                          | 7.43       | 4.09       | 1.99      | 1.19      | 10.08     | 0.0002   | 0.0033    | PPP1R3C         | protein phosphatase 1, regulatory subunit 3C                                 |
| 16707096                                          | 4.52       | 1.21       | 1.01      | 0.34      | 9.98      | 5.50E-08 | 8.13E-06  | LIPN            | lipase, family member N                                                      |
| 16730157                                          | 4.98       | 1.67       | 0.65      | 0.63      | 9.89      | 3.40E-09 | 1.27E-06  | HEPHL1          | hephaestin-like 1                                                            |
| 16671023                                          | 8.43       | 5.14       | 0.73      | 1.1       | 9.81      | 4.00E-07 | 3.11E-05  | CRCT1           | cysteine rich C-terminal 1                                                   |
| 16693295                                          | 9.17       | 5.89       | 0.48      | 1.88      | 9.7       | 1.23E-05 | 0.0004    | RPTN            | repetin                                                                      |
| 17087879                                          | 4.22       | 0.96       | 1.31      | 0.2       | 9.57      | 5.02E-06 | 0.0002    |                 |                                                                              |
| 16872621                                          | 7.38       | 4.25       | 0.45      | 0.81      | 8.77      | 5.12E-09 | 1.65E-06  |                 |                                                                              |
| 17123540                                          | 5.16       | 2.05       | 1.25      | 0.51      | 8.66      | 4.59E-06 | 0.0002    |                 |                                                                              |
| 16824352                                          | 4.95       | 1.89       | 1.39      | 0.51      | 8.34      | 1.59E-05 | 0.0005    | XYLT1           | xylosyltransferase I                                                         |
| 16693335                                          | 5.12       | 2.16       | 1.25      | 0.45      | 7.76      | 1.87E-07 | 1.83E-05  | LCE3D           | late cornified envelope 3D                                                   |
| 16813112                                          | 9.18       | 6.23       | 0.51      | 0.92      | 7.75      | 7.27E-08 | 9.74E-06  | RHCG            | Rh family, C glycoprotein                                                    |
| 16976177                                          | 4.57       | 1.62       | 1.05      | 0.21      | 7.73      | 5.33E-07 | 3.72E-05  | HOPX            | HOP homeobox                                                                 |
| 16761726                                          | 6.63       | 3.68       | 0.74      | 0.71      | 7.69      | 1.07E-07 | 1.24E-05  | PLBD1           | phospholipase B domain containing 1                                          |
| 16925872                                          | 4.85       | 1.91       | 1.01      | 0.42      | 7.67      | 2.46E-07 | 2.22E-05  | TMPRSS2         | transmembrane protease, serine 2                                             |
| 16707729                                          | 8.35       | 5.41       | 0.68      | 1.46      | 7.66      | 2.29E-05 | 0.0006    | CYP2C18         | cytochrome P450, family 2, subfamily C, polypeptide 18                       |
| 16884372                                          | 5.22       | 2.3        | 1.04      | 0.42      | 7.58      | 2.64E-06 | 0.0001    | MERTK           | MER proto-oncogene, tyrosine kinase                                          |
| 17061129                                          | 5.96       | 3.04       | 0.95      | 1.62      | 7.55      | 0.0011   | 0.0124    | RASA4B; RASA4   | RAS p21 protein activator 4B; RAS p21 protein activator 4                    |

|          |       |      |      |      |      |          |          |               |                                                                             |
|----------|-------|------|------|------|------|----------|----------|---------------|-----------------------------------------------------------------------------|
| 16671094 | 6.66  | 3.77 | 0.55 | 1.05 | 7.44 | 2.40E-06 | 0.0001   | IVL           | involucrin                                                                  |
| 17081297 | 5.31  | 2.46 | 0.85 | 0.38 | 7.2  | 1.96E-07 | 1.89E-05 |               |                                                                             |
| 16896170 | 6.7   | 3.86 | 0.92 | 0.89 | 7.13 | 2.44E-06 | 0.0001   | CAPN14        | calpain 14                                                                  |
| 17094917 | 6.98  | 4.15 | 1.18 | 1.34 | 7.1  | 0.0002   | 0.0026   | LOC105376081  | uncharacterized LOC105376081                                                |
| 16746217 | 4.03  | 1.21 | 1.22 | 0.54 | 7.06 | 1.72E-05 | 0.0005   |               |                                                                             |
| 16962799 | 6.65  | 3.84 | 0.78 | 1.12 | 7.03 | 2.90E-06 | 0.0001   | ATP13A4       | ATPase type 13A4                                                            |
| 16869803 | 7.41  | 4.6  | 0.64 | 0.96 | 7.01 | 1.40E-06 | 7.44E-05 | EPHX3         | epoxide hydrolase 3                                                         |
| 17011279 | 7.12  | 4.31 | 0.41 | 0.26 | 7.01 | 2.85E-12 | 1.53E-08 | PRDM1         | PR domain containing 1, with ZNF domain                                     |
| 17095345 | 5.51  | 2.71 | 0.76 | 0.83 | 6.97 | 4.61E-07 | 3.40E-05 | SLC28A3       | solute carrier family 28 (concentrative nucleoside transporter), member 3   |
| 16861945 | 10.24 | 7.45 | 0.56 | 0.78 | 6.93 | 1.20E-07 | 1.35E-05 | NCCRP1        | non-specific cytotoxic cell receptor protein 1 homolog (zebrafish)          |
| 16766334 | 4.66  | 1.88 | 0.98 | 1.01 | 6.85 | 2.30E-05 | 0.0006   | SDR9C7        | short chain dehydrogenase/reductase family 9C, member 7                     |
| 16976438 | 8.37  | 5.59 | 0.59 | 0.53 | 6.83 | 1.45E-08 | 3.34E-06 | TMPRSS11D     | transmembrane protease, serine 11D                                          |
| 16967327 | 8.33  | 5.57 | 0.82 | 0.86 | 6.77 | 2.58E-06 | 0.0001   | TMPRSS11E     | transmembrane protease, serine 11E                                          |
| 16980021 | 6.08  | 3.34 | 1.02 | 0.87 | 6.68 | 1.49E-05 | 0.0004   | SETD7         | SET domain containing (lysine methyltransferase) 7                          |
| 17096030 | 5.4   | 2.67 | 1.58 | 0.46 | 6.64 | 0.0004   | 0.0056   | FBP1          | fructose-1,6-bisphosphatase 1                                               |
| 17087874 | 3.72  | 1.03 | 1.26 | 0.33 | 6.48 | 4.58E-05 | 0.001    |               |                                                                             |
| 17122140 | 5.32  | 2.62 | 1.49 | 0.2  | 6.47 | 5.73E-05 | 0.0012   |               |                                                                             |
| 16703659 | 4.65  | 1.95 | 0.61 | 0.69 | 6.46 | 5.66E-08 | 8.31E-06 | MAP3K8        | mitogen-activated protein kinase kinase kinase 8                            |
| 17010544 | 9.39  | 6.7  | 0.69 | 0.56 | 6.46 | 7.69E-08 | 9.96E-06 | SH3BGR2       | SH3 domain binding glutamate-rich protein like 2                            |
| 16865590 | 6.95  | 4.28 | 0.64 | 0.41 | 6.37 | 2.92E-09 | 1.17E-06 | EPS8L1        | EPS8-like 1                                                                 |
| 16867558 | 4.11  | 1.45 | 0.85 | 0.47 | 6.3  | 3.08E-07 | 2.60E-05 | FUT6          | fucosyltransferase 6 (alpha (1,3) fucosyltransferase)                       |
| 16808066 | 5.5   | 2.84 | 0.63 | 1.35 | 6.29 | 9.76E-06 | 0.0003   | TGM5          | transglutaminase 5                                                          |
| 16660014 | 5.91  | 3.26 | 0.91 | 0.74 | 6.29 | 2.46E-06 | 0.0001   | PADI1         | peptidyl arginine deiminase, type I                                         |
| 16981791 | 10.29 | 7.65 | 0.8  | 0.75 | 6.24 | 5.22E-07 | 3.68E-05 |               |                                                                             |
| 16914935 | 3.13  | 0.49 | 1.29 | 0.98 | 6.24 | 0.0024   | 0.0228   |               |                                                                             |
| 16977502 | 6.87  | 4.24 | 1.03 | 0.6  | 6.22 | 1.32E-05 | 0.0004   | PLAC8         | placenta specific 8                                                         |
| 16712373 | 5.92  | 3.32 | 0.64 | 0.87 | 6.08 | 1.61E-06 | 8.27E-05 | NEBL          | nebullette                                                                  |
| 16764907 | 3.16  | 0.58 | 1.27 | 0.78 | 5.98 | 0.0003   | 0.0042   | KRT6C         | keratin 6C, type II                                                         |
| 17123808 | 3.92  | 1.35 | 1.25 | 0.36 | 5.93 | 1.42E-05 | 0.0004   |               |                                                                             |
| 16844735 | 10.31 | 7.75 | 0.98 | 1.61 | 5.87 | 0.0008   | 0.0099   | KRT13         | keratin 13, type I                                                          |
| 16769481 | 6.82  | 4.27 | 0.54 | 0.67 | 5.87 | 7.26E-08 | 9.74E-06 | ALDH1L2       | aldehyde dehydrogenase 1 family, member L2                                  |
| 16974049 | 4.32  | 1.77 | 0.27 | 0.27 | 5.86 | 2.68E-13 | 3.95E-09 | PPP2R2C       | protein phosphatase 2, regulatory subunit B, gamma                          |
| 16962850 | 5.6   | 3.08 | 0.93 | 0.69 | 5.75 | 1.72E-06 | 8.67E-05 | LOC105374284  | uncharacterized LOC105374284                                                |
| 16703563 | 5.65  | 3.19 | 1.02 | 0.84 | 5.49 | 4.73E-05 | 0.001    | BAMBI         | BMP and activin membrane-bound inhibitor                                    |
| 16731490 | 4.07  | 1.62 | 1.15 | 0.59 | 5.46 | 6.97E-05 | 0.0014   | LOC105369502  | uncharacterized LOC105369502                                                |
| 17094893 | 5.78  | 3.34 | 0.83 | 0.89 | 5.44 | 1.15E-05 | 0.0004   | ALDH1A1       | aldehyde dehydrogenase 1 family, member A1                                  |
| 16877097 | 4.27  | 1.83 | 0.62 | 0.59 | 5.44 | 4.46E-07 | 3.34E-05 | ATP6V1C2      | ATPase, H+ transporting, lysosomal 42kDa, V1 subunit C2                     |
| 16756310 | 6.01  | 3.57 | 0.46 | 0.31 | 5.41 | 1.12E-10 | 1.93E-07 | TCP11L2       | t-complex 11, testis-specific-like 2                                        |
| 17044253 | 6.45  | 4.03 | 1.14 | 1.27 | 5.36 | 0.0005   | 0.0068   | GPNMB         | glycoprotein (transmembrane) nmb                                            |
| 17061097 | 5.26  | 2.85 | 0.65 | 0.98 | 5.32 | 2.60E-05 | 0.0007   | RASA4B; RASA4 | RAS p21 protein activator 4B; RAS p21 protein activator 4                   |
| 16737282 | 6.65  | 4.24 | 0.64 | 0.64 | 5.31 | 1.07E-07 | 1.24E-05 | ELF5          | E74-like factor 5 (ets domain transcription factor)                         |
| 16716525 | 5.06  | 2.66 | 0.52 | 0.48 | 5.26 | 1.43E-08 | 3.32E-06 | CPEB3         | cytoplasmic polyadenylation element binding protein 3                       |
| 17059567 | 6.68  | 4.29 | 0.87 | 0.55 | 5.24 | 7.28E-07 | 4.70E-05 | STEAP4        | STEAP family member 4                                                       |
| 16829801 | 4.54  | 2.15 | 0.79 | 0.62 | 5.22 | 1.53E-07 | 1.59E-05 | SPNS2         | spinster homolog 2 (Drosophila)                                             |
| 16955220 | 3.38  | 1    | 1.33 | 0.29 | 5.21 | 0.0001   | 0.0021   | WNT5A         | wingless-type MMTV integration site family, member 5A                       |
| 16888578 | 7.17  | 4.8  | 0.66 | 0.32 | 5.19 | 2.86E-08 | 5.11E-06 | GULP1         | GULP, engulfment adaptor PTB domain containing 1                            |
| 16968274 | 3.21  | 0.84 | 1.12 | 0.25 | 5.17 | 4.84E-06 | 0.0002   | LINC01088     | long intergenic non-protein coding RNA 1088                                 |
| 16764791 | 6.15  | 3.8  | 0.82 | 0.35 | 5.12 | 7.84E-07 | 4.96E-05 | KRT80         | keratin 80, type II                                                         |
| 16846218 | 4.96  | 2.63 | 0.74 | 0.63 | 5    | 1.12E-06 | 6.37E-05 | HOXB2         | homeobox B2                                                                 |
| 17061119 | 4.32  | 2.02 | 1.06 | 1.32 | 4.94 | 0.0026   | 0.0241   | RASA4B; RASA4 | RAS p21 protein activator 4B; RAS p21 protein activator 4                   |
| 17105903 | 3.21  | 0.92 | 1.16 | 0.2  | 4.91 | 3.40E-06 | 0.0001   | MUM1L1        | melanoma associated antigen (mutated) 1-like 1                              |
| 16862548 | 11.53 | 9.24 | 0.28 | 1.01 | 4.9  | 9.02E-07 | 5.52E-05 | CEACAM5       | carcinoembryonic antigen-related cell adhesion molecule 5                   |
| 16816978 | 7.15  | 4.86 | 0.62 | 0.81 | 4.9  | 5.58E-07 | 3.84E-05 | SCNN1B        | sodium channel, non voltage gated 1 beta subunit                            |
| 16861126 | 4.27  | 1.98 | 1.14 | 0.61 | 4.87 | 7.38E-05 | 0.0015   | UPK1A         | uroplakin 1A                                                                |
| 16764894 | 6.12  | 3.84 | 0.6  | 0.89 | 4.86 | 2.99E-06 | 0.0001   | KRT6B         | keratin 6B, type II                                                         |
| 16966621 | 7.04  | 4.76 | 0.3  | 0.81 | 4.86 | 1.62E-07 | 1.66E-05 | CWH43         | cell wall biogenesis 43 C-terminal homolog                                  |
| 16819257 | 3.82  | 1.54 | 1.63 | 0.95 | 4.85 | 0.0009   | 0.0105   | MT1H          | metallothionein 1H                                                          |
| 17102566 | 6.4   | 4.13 | 0.85 | 1.13 | 4.84 | 0.0003   | 0.0039   | SYTL5         | synaptotagmin-like 5                                                        |
| 16968428 | 3.56  | 1.29 | 1.23 | 0.69 | 4.84 | 0.0003   | 0.0048   |               |                                                                             |
| 16762337 | 7.39  | 5.12 | 0.79 | 0.39 | 4.83 | 6.12E-07 | 4.10E-05 | BCAT1         | branched chain amino-acid transaminase 1, cytosolic                         |
| 16874740 | 9.21  | 6.95 | 0.44 | 0.53 | 4.8  | 3.66E-09 | 1.30E-06 | KLK11         | kallikrein related peptidase 11                                             |
| 17028938 | 4.02  | 1.77 | 1.39 | 0.61 | 4.77 | 0.0002   | 0.0028   |               |                                                                             |
| 17076285 | 6.46  | 4.22 | 0.82 | 0.26 | 4.75 | 2.79E-07 | 2.44E-05 | RAB11FIP1     | RAB11 family interacting protein 1 (class I)                                |
| 16687602 | 6.31  | 4.07 | 0.52 | 0.29 | 4.72 | 1.44E-08 | 3.33E-06 | TTC22         | tetratricopeptide repeat domain 22                                          |
| 16965606 | 5.75  | 3.53 | 1.03 | 0.63 | 4.66 | 2.09E-05 | 0.0006   | SLC34A2       | solute carrier family 34 (type II sodium/phosphate cotransporter), member 2 |
| 16693393 | 5.29  | 3.07 | 0.78 | 1.08 | 4.66 | 7.86E-05 | 0.0016   | PGLYRP4       | peptidoglycan recognition protein 4                                         |
| 16975777 | 4.83  | 2.61 | 0.64 | 0.61 | 4.64 | 1.52E-06 | 7.95E-05 | TEC           | tec protein tyrosine kinase                                                 |
| 16839177 | 5.59  | 3.38 | 0.37 | 0.7  | 4.63 | 9.98E-08 | 1.19E-05 | METRNL        | meteorin, glial cell differentiation regulator-like                         |
| 16693409 | 7.21  | 5.01 | 0.77 | 0.7  | 4.61 | 3.71E-06 | 0.0002   | S100A12       | S100 calcium binding protein A12                                            |
| 17093920 | 8.56  | 6.36 | 0.52 | 0.49 | 4.59 | 2.23E-08 | 4.36E-06 | GNE           | glucosamine (UDP-N-acetyl)-2-epimerase/N-acetylmannosamine kinase           |
| 16671104 | 10.88 | 8.69 | 0.23 | 1.18 | 4.56 | 6.31E-06 | 0.0002   | SPRR1A        | small proline-rich protein 1A                                               |
| 16906175 | 4.04  | 1.85 | 0.93 | 0.24 | 4.55 | 5.50E-06 | 0.0002   | FRZB          | frizzled-related protein                                                    |
| 16949264 | 6.21  | 4.03 | 0.94 | 0.46 | 4.54 | 0.0001   | 0.0025   | LOC344887     | NmrA-like family domain containing 1 pseudogene                             |
| 16929368 | 3.59  | 1.42 | 0.52 | 0.24 | 4.52 | 3.35E-09 | 1.27E-06 | SLC5A1        | solute carrier family 5 (sodium/glucose cotransporter), member 1            |
| 17073213 | 5.65  | 3.48 | 0.84 | 1.05 | 4.51 | 9.60E-05 | 0.0018   | PSCA          | prostate stem cell antigen                                                  |
| 17008092 | 8.16  | 5.98 | 0.33 | 0.38 | 4.51 | 4.69E-10 | 3.90E-07 | PIM1          | Pim-1 proto-oncogene, serine/threonine kinase                               |
| 16914925 | 6.23  | 4.06 | 1.14 | 0.39 | 4.49 | 7.05E-05 | 0.0014   | TSHZ2         | teashirt zinc finger homeobox 2                                             |
| 17081957 | 4.21  | 2.04 | 0.74 | 0.46 | 4.49 | 4.04E-07 | 3.13E-05 | LYNX1         | Ly6/neurotoxin 1                                                            |
| 17060287 | 6.92  | 4.76 | 0.6  | 1.01 | 4.47 | 2.55E-06 | 0.0001   | CYP3A5        | cytochrome P450, family 3, subfamily A, polypeptide 5                       |
| 16837915 | 4.14  | 1.98 | 0.57 | 0.35 | 4.47 | 5.70E-08 | 8.31E-06 | SMIM5         | small integral membrane protein 5                                           |



|          |       |      |      |      |      |          |          |                |                                                                                            |
|----------|-------|------|------|------|------|----------|----------|----------------|--------------------------------------------------------------------------------------------|
| 16980026 | 4.28  | 2.12 | 1.09 | 0.74 | 4.45 | 0.0001   | 0.002    | LOC101927490   | uncharacterized LOC101927490                                                               |
| 16874765 | 3.93  | 1.78 | 0.98 | 0.17 | 4.44 | 2.44E-06 | 0.0001   | KLK13          | kallikrein related peptidase 13                                                            |
| 16717005 | 5.56  | 3.41 | 0.56 | 0.47 | 4.43 | 4.21E-09 | 1.43E-06 | PIK3AP1        | phosphoinositide-3-kinase adaptor protein 1                                                |
| 16874702 | 9.52  | 7.38 | 0.54 | 0.5  | 4.43 | 4.97E-08 | 7.64E-06 | KLK7           | kallikrein related peptidase 7                                                             |
| 16703642 | 5.05  | 2.91 | 0.66 | 0.43 | 4.41 | 1.29E-07 | 1.43E-05 | MAP3K8         | mitogen-activated protein kinase kinase 8                                                  |
| 17025046 | 5.95  | 3.82 | 0.58 | 0.45 | 4.39 | 1.73E-07 | 1.73E-05 | CNKS3          | CNKS family member 3                                                                       |
| 17060049 | 4.55  | 2.42 | 0.49 | 0.52 | 4.37 | 8.62E-08 | 1.07E-05 | DLX5           | distal-less homeobox 5                                                                     |
| 16818820 | 3.78  | 1.66 | 0.4  | 0.63 | 4.35 | 3.34E-08 | 5.73E-06 | NOD2           | nucleotide-binding oligomerization domain containing 2                                     |
| 16874693 | 7.64  | 5.52 | 0.91 | 0.69 | 4.35 | 1.37E-05 | 0.0004   | KLK6           | kallikrein related peptidase 6                                                             |
| 17013657 | 6.03  | 3.91 | 0.45 | 0.75 | 4.34 | 2.58E-07 | 2.30E-05 | ULBP1          | UL16 binding protein 1                                                                     |
| 16828471 | 4.77  | 2.65 | 1.22 | 0.9  | 4.34 | 0.0004   | 0.0056   | CHST6          | carbohydrate (N-acetylglucosamine 6-O) sulfotransferase 6                                  |
| 16825647 | 7.55  | 5.44 | 0.45 | 0.73 | 4.33 | 9.38E-07 | 5.62E-05 | GDPD3          | glycerophosphodiester phosphodiesterase domain containing 3                                |
| 16785943 | 6.98  | 4.87 | 0.73 | 0.74 | 4.31 | 1.55E-05 | 0.0005   | LINC01269      | long intergenic non-protein coding RNA 1269                                                |
| 16698766 | 6.05  | 3.95 | 0.46 | 0.44 | 4.28 | 2.14E-08 | 4.30E-06 | YOD1           | YOD1 deubiquitinase                                                                        |
| 16790143 | 4.18  | 2.09 | 0.62 | 0.14 | 4.27 | 1.06E-08 | 2.77E-06 | NDRG2          | NDRG family member 2                                                                       |
| 17017363 | 5.75  | 3.65 | 1.06 | 0.54 | 4.27 | 2.17E-05 | 0.0006   | LY6G6C         | lymphocyte antigen 6 complex, locus G6C                                                    |
| 17029219 | 5.75  | 3.65 | 1.06 | 0.54 | 4.27 | 2.17E-05 | 0.0006   |                |                                                                                            |
| 17032004 | 5.75  | 3.65 | 1.06 | 0.54 | 4.27 | 2.17E-05 | 0.0006   |                |                                                                                            |
| 17034474 | 5.75  | 3.65 | 1.06 | 0.54 | 4.27 | 2.17E-05 | 0.0006   |                |                                                                                            |
| 17036722 | 5.75  | 3.65 | 1.06 | 0.54 | 4.27 | 2.17E-05 | 0.0006   |                |                                                                                            |
| 17042000 | 5.75  | 3.65 | 1.06 | 0.54 | 4.27 | 2.17E-05 | 0.0006   |                |                                                                                            |
| 17092901 | 7.08  | 4.99 | 0.39 | 0.64 | 4.26 | 5.28E-08 | 7.88E-06 | CDKN2B         | cyclin-dependent kinase inhibitor 2B (p15, inhibits CDK4)                                  |
| 16670681 | 4.54  | 2.45 | 1.44 | 0.48 | 4.25 | 0.0011   | 0.0119   | ANXA9          | annexin A9                                                                                 |
| 17078943 | 9.56  | 7.47 | 0.93 | 1.01 | 4.24 | 0.0001   | 0.0022   | CALB1          | calbindin 1                                                                                |
| 16945682 | 6.54  | 4.46 | 0.73 | 0.9  | 4.23 | 5.07E-05 | 0.0011   | ACPP           | acid phosphatase, prostate                                                                 |
| 16873528 | 3.25  | 1.17 | 1.89 | 0.39 | 4.22 | 0.0007   | 0.0084   | LOC645553      | uncharacterized LOC645553                                                                  |
| 16695535 | 3.96  | 1.89 | 0.65 | 0.64 | 4.22 | 7.34E-07 | 4.72E-05 | ARHGAP30       | Rho GTPase activating protein 30                                                           |
| 16666799 | 9.86  | 7.79 | 1.07 | 1.19 | 4.2  | 0.0006   | 0.0082   | CLCA4          | chloride channel accessory 4                                                               |
| 16980727 | 7.06  | 4.99 | 0.81 | 0.36 | 4.19 | 1.20E-06 | 6.70E-05 |                |                                                                                            |
| 17039517 | 5.19  | 3.12 | 1.2  | 0.44 | 4.18 | 4.20E-05 | 0.001    |                |                                                                                            |
| 17123804 | 3.28  | 1.22 | 1.11 | 0.18 | 4.17 | 0.0001   | 0.0021   |                |                                                                                            |
| 16880707 | 3.14  | 1.08 | 1.22 | 0.95 | 4.17 | 0.0009   | 0.0106   |                |                                                                                            |
| 16864427 | 5.19  | 3.14 | 0.58 | 0.67 | 4.15 | 1.13E-06 | 6.40E-05 | MYH14          | myosin, heavy chain 14, non-muscle                                                         |
| 16990718 | 10.25 | 8.2  | 0.42 | 1.08 | 4.15 | 1.26E-05 | 0.0004   | SPINK5         | serine peptidase inhibitor, Kazal type 5                                                   |
| 16670479 | 5.62  | 3.57 | 0.47 | 0.61 | 4.15 | 1.37E-07 | 1.49E-05 | CIART          | circadian associated repressor of transcription                                            |
| 16699545 | 4.91  | 2.86 | 0.73 | 0.48 | 4.14 | 2.93E-07 | 2.51E-05 | LOC101929771   | uncharacterized LOC101929771                                                               |
| 16962316 | 7.21  | 5.16 | 0.54 | 0.56 | 4.14 | 4.26E-07 | 3.24E-05 | LIPH           | lipase, member H                                                                           |
| 17000168 | 8.85  | 6.8  | 1.05 | 1.34 | 4.14 | 0.0038   | 0.0329   | CXCL14         | chemokine (C-X-C motif) ligand 14                                                          |
| 16695558 | 7.85  | 5.81 | 0.42 | 0.7  | 4.13 | 2.68E-07 | 2.36E-05 | PVRL4          | poliovirus receptor-related 4                                                              |
| 16670710 | 6.53  | 4.49 | 0.52 | 0.68 | 4.13 | 5.31E-07 | 3.72E-05 | BNIP1          | BCL2/adenovirus E1B 19kD interacting protein like                                          |
| 16715212 | 3.73  | 1.69 | 0.88 | 0.19 | 4.11 | 5.72E-06 | 0.0002   | UNC5B-AS1      | UNC5B antisense RNA 1                                                                      |
| 16955197 | 5.18  | 3.14 | 0.47 | 0.32 | 4.09 | 3.52E-09 | 1.29E-06 | WNT5A          | wingless-type MMTV integration site family, member 5A                                      |
| 16728617 | 5     | 2.98 | 0.62 | 0.33 | 4.05 | 2.09E-07 | 1.97E-05 | FOLR3          | folate receptor 3 (gamma)                                                                  |
| 16844294 | 7.77  | 5.76 | 0.7  | 0.88 | 4.02 | 7.41E-05 | 0.0015   | NR1D1          | nuclear receptor subfamily 1, group D, member 1                                            |
| 17002846 | 9.71  | 7.7  | 0.42 | 0.4  | 4.01 | 5.01E-09 | 1.63E-06 | DUSP1          | dual specificity phosphatase 1                                                             |
| 16741142 | 7.9   | 5.91 | 0.75 | 1.04 | 3.97 | 7.30E-05 | 0.0015   | ALDH3B2        | aldehyde dehydrogenase 3 family, member B2                                                 |
| 16697095 | 8.22  | 6.24 | 0.56 | 0.47 | 3.94 | 8.63E-08 | 1.07E-05 | NCF2           | neutrophil cytosolic factor 2                                                              |
| 16799662 | 3.39  | 1.41 | 0.8  | 0.15 | 3.93 | 4.93E-07 | 3.56E-05 | C15orf62       | chromosome 15 open reading frame 62                                                        |
| 16919531 | 7.03  | 5.06 | 1.13 | 0.91 | 3.93 | 0.0006   | 0.0082   | WFDC5          | WAP four-disulfide core domain 5                                                           |
| 16872803 | 7.03  | 5.05 | 0.54 | 0.4  | 3.92 | 7.93E-08 | 1.01E-05 | CEACAM1        | carcinoembryonic antigen-related cell adhesion molecule 1 (biliary glycoprotein)           |
| 16666055 | 6.23  | 4.26 | 0.38 | 0.56 | 3.91 | 1.84E-08 | 3.83E-06 | CTH            | cystathionine gamma-lyase                                                                  |
| 16750974 | 6.74  | 4.77 | 1.32 | 1.22 | 3.91 | 0.002    | 0.0197   | AQP5           | aquaporin 5                                                                                |
| 16971737 | 6.83  | 4.87 | 0.8  | 0.76 | 3.9  | 4.86E-05 | 0.0011   | GUCY1B3        | guanylate cyclase 1, soluble, beta 3                                                       |
| 16840817 | 5.91  | 3.95 | 0.42 | 0.5  | 3.89 | 1.43E-08 | 3.32E-06 | ALOXE3         | arachidonate lipoxygenase 3                                                                |
| 16836528 | 4.81  | 2.86 | 0.71 | 0.74 | 3.88 | 4.59E-06 | 0.0002   | YPEL2          | yippee like 2                                                                              |
| 16713779 | 6.66  | 4.71 | 0.53 | 0.48 | 3.87 | 3.11E-07 | 2.60E-05 | FAM25C; FAM25G | family with sequence similarity 25, member C; family with sequence similarity 25, member D |
| 16686201 | 7.08  | 5.13 | 0.3  | 0.67 | 3.86 | 1.22E-07 | 1.38E-05 | SLC6A9         | solute carrier family 6 (neurotransmitter transporter, glycine), member 9                  |
| 17123272 | 3.87  | 1.93 | 1.37 | 0.32 | 3.84 | 0.0004   | 0.006    |                |                                                                                            |
| 17125182 | 3.16  | 1.22 | 0.53 | 0.56 | 3.82 | 4.51E-07 | 3.36E-05 |                |                                                                                            |
| 16997143 | 2.87  | 0.94 | 1.06 | 0.77 | 3.81 | 0.0008   | 0.0091   | LOC105379031   | uncharacterized LOC105379031                                                               |
| 17100671 | 4.91  | 2.98 | 1.03 | 0.46 | 3.81 | 0.0001   | 0.0022   |                |                                                                                            |
| 16693308 | 7.29  | 5.37 | 0.7  | 0.95 | 3.79 | 3.93E-05 | 0.0009   | FLG            | filaggrin                                                                                  |
| 16785938 | 8.65  | 6.72 | 0.37 | 0.31 | 3.79 | 8.55E-10 | 5.89E-07 | TTC9           | tetratricopeptide repeat domain 9                                                          |
| 16704607 | 6.65  | 4.73 | 0.53 | 0.46 | 3.79 | 3.43E-07 | 2.80E-05 | FAM25C; FAM25G | family with sequence similarity 25, member C; family with sequence similarity 25, member D |
| 16910284 | 2.95  | 1.03 | 1.08 | 0.32 | 3.77 | 0.0001   | 0.002    | C2orf54        | chromosome 2 open reading frame 54                                                         |
| 16670185 | 7.33  | 5.42 | 0.63 | 1.31 | 3.77 | 2.48E-05 | 0.0006   | LOC284561      | uncharacterized LOC284561                                                                  |
| 16698185 | 5.11  | 3.2  | 0.74 | 0.79 | 3.76 | 0.0001   | 0.002    | CHI3L1         | chitinase 3-like 1 (cartilage glycoprotein-39)                                             |
| 16693406 | 7.44  | 5.53 | 0.33 | 0.51 | 3.76 | 3.23E-08 | 5.60E-06 |                |                                                                                            |
| 16919538 | 2.9   | 0.99 | 0.66 | 0.34 | 3.75 | 3.13E-07 | 2.62E-05 | WFDC12         | WAP four-disulfide core domain 12                                                          |
| 16975737 | 4.83  | 2.94 | 0.61 | 0.74 | 3.71 | 1.14E-05 | 0.0004   | CNGA1          | cyclic nucleotide gated channel alpha 1                                                    |
| 16900875 | 3.41  | 1.52 | 0.63 | 0.31 | 3.71 | 5.06E-07 | 3.60E-05 | MGAT4A         | mannosyl (alpha-1,3)-glycoprotein beta-1,4-N-acetylglucosaminyltransferase, isozyme        |
| 16866290 | 6.67  | 4.78 | 0.56 | 0.6  | 3.69 | 1.03E-06 | 6.03E-05 | RNF225         | ring finger protein 225                                                                    |
| 16667778 | 3.06  | 1.19 | 0.82 | 0.45 | 3.66 | 4.00E-05 | 0.0009   | LOC105378872   | uncharacterized LOC105378872                                                               |
| 16785709 | 4.2   | 2.34 | 1.03 | 0.96 | 3.65 | 1.55E-05 | 0.0005   | RDH12          | retinol dehydrogenase 12 (all-trans/9-cis/11-cis)                                          |
| 16874731 | 8.64  | 6.77 | 0.47 | 0.39 | 3.64 | 3.34E-08 | 5.73E-06 | KLK10          | kallikrein related peptidase 10                                                            |
| 16977760 | 7.04  | 5.18 | 0.31 | 0.65 | 3.61 | 3.57E-07 | 2.87E-05 | SLC10A6        | solute carrier family 10 (sodium/bile acid cotransporter), member 6                        |
| 16671632 | 7.27  | 5.42 | 0.3  | 0.65 | 3.61 | 5.54E-08 | 8.18E-06 | EFNA3          | ephrin-A3                                                                                  |
| 16683541 | 6.26  | 4.41 | 0.64 | 0.34 | 3.61 | 6.21E-07 | 4.14E-05 | IL22RA1        | interleukin 22 receptor, alpha 1                                                           |
| 17119822 | 5.21  | 3.36 | 0.4  | 1.1  | 3.6  | 7.55E-05 | 0.0015   |                |                                                                                            |
| 16763650 | 3.5   | 1.65 | 1.37 | 0.39 | 3.59 | 0.0013   | 0.0144   | ENDOU          | endonuclease, polyU-specific                                                               |

|          |       |      |      |      |      |          |          |                 |                                                                                                                                        |
|----------|-------|------|------|------|------|----------|----------|-----------------|----------------------------------------------------------------------------------------------------------------------------------------|
| 17124140 | 6.71  | 4.87 | 0.86 | 1.04 | 3.59 | 0.0007   | 0.0088   |                 |                                                                                                                                        |
| 16801604 | 4.63  | 2.79 | 0.8  | 0.29 | 3.58 | 2.41E-06 | 0.0001   | GCNT3           | glucosaminyl (N-acetyl) transferase 3, mucin type                                                                                      |
| 16948572 | 5.57  | 3.73 | 0.34 | 0.21 | 3.57 | 4.10E-11 | 1.39E-07 | KLHL24          | kelch-like family member 24                                                                                                            |
| 16777190 | 8.5   | 6.67 | 0.68 | 0.89 | 3.55 | 5.00E-05 | 0.0011   | GJB6            | gap junction protein beta 6                                                                                                            |
| 16744991 | 8.69  | 6.86 | 0.27 | 0.33 | 3.55 | 1.18E-09 | 7.24E-07 | MPZL3           | myelin protein zero-like 3                                                                                                             |
| 16845937 | 7.05  | 5.24 | 0.69 | 0.54 | 3.52 | 5.23E-06 | 0.0002   | PLEKHM1         | pleckstrin homology domain containing, family M (with RUN domain) member 1                                                             |
| 17019877 | 2.85  | 1.04 | 0.92 | 0.2  | 3.51 | 1.76E-05 | 0.0005   | CRISP3          | cysteine-rich secretory protein 3                                                                                                      |
| 16983765 | 6.39  | 4.58 | 0.67 | 0.97 | 3.51 | 6.46E-05 | 0.0013   | NPR3            | natriuretic peptide receptor 3                                                                                                         |
| 16676764 | 8.79  | 6.99 | 0.56 | 0.33 | 3.5  | 7.50E-08 | 9.95E-06 | CD55            | CD55 molecule, decay accelerating factor for complement (Cromer blood group)                                                           |
| 16840976 | 3.86  | 2.05 | 0.73 | 0.34 | 3.5  | 1.08E-06 | 6.21E-05 | RNF222          | ring finger protein 222                                                                                                                |
| 16923145 | 6.1   | 4.29 | 0.31 | 0.44 | 3.5  | 1.60E-08 | 3.58E-06 | ABCG1           | ATP binding cassette subfamily G member 1                                                                                              |
| 17058152 | 7.18  | 5.38 | 0.51 | 0.38 | 3.49 | 6.19E-08 | 8.80E-06 | ERV3-1; ZNF117  | endogenous retrovirus group 3, member 1; zinc finger protein 117                                                                       |
| 16850344 | 9.79  | 7.99 | 0.37 | 0.25 | 3.48 | 1.04E-09 | 6.79E-07 | MIR4315-1; MIR4 | microRNA 4315-1; microRNA 4315-2; pleckstrin homology domain containing, family M                                                      |
| 16671100 | 4.22  | 2.42 | 0.87 | 0.39 | 3.47 | 2.70E-05 | 0.0007   | SPRR4           | small proline-rich protein 4                                                                                                           |
| 17058142 | 5.63  | 3.84 | 0.7  | 0.7  | 3.46 | 3.72E-05 | 0.0009   | ZNF117          | zinc finger protein 117                                                                                                                |
| 16802497 | 6.22  | 4.43 | 0.85 | 1.15 | 3.46 | 0.0062   | 0.048    | PAQR5           | progesterone and adiponectin receptor family member V                                                                                  |
| 17047795 | 3.42  | 1.63 | 0.93 | 0.49 | 3.46 | 6.32E-05 | 0.0013   | CD36            | CD36 molecule (thrombospondin receptor)                                                                                                |
| 16693331 | 2.48  | 0.69 | 1.45 | 0.28 | 3.45 | 0.0007   | 0.0086   | LCE3E           | late cornified envelope 3E                                                                                                             |
| 17039213 | 2.78  | 1    | 1.27 | 0.35 | 3.45 | 6.11E-05 | 0.0013   |                 |                                                                                                                                        |
| 16938271 | 7.18  | 5.39 | 0.49 | 0.28 | 3.44 | 4.77E-08 | 7.49E-06 | KAT2B           | K(lysine) acetyltransferase 2B                                                                                                         |
| 16929562 | 4.35  | 2.57 | 0.89 | 0.34 | 3.44 | 1.69E-05 | 0.0005   | HMOX1           | heme oxygenase 1                                                                                                                       |
| 16667783 | 2.4   | 0.62 | 1.06 | 0.21 | 3.43 | 2.37E-05 | 0.0006   | DNAJA1P5        | DnaJ (Hsp40) homolog, subfamily A, member 1 pseudogene 5                                                                               |
| 16874005 | 7.53  | 5.76 | 0.37 | 0.91 | 3.42 | 2.53E-05 | 0.0006   | DBP             | D site of albumin promoter (albumin D-box) binding protein                                                                             |
| 16833060 | 4.39  | 2.62 | 0.61 | 0.36 | 3.41 | 9.26E-07 | 5.59E-05 | LRRC37B         | leucine rich repeat containing 37B                                                                                                     |
| 16751552 | 3.48  | 1.72 | 0.72 | 0.31 | 3.39 | 1.51E-06 | 7.87E-05 |                 |                                                                                                                                        |
| 16884607 | 3.86  | 2.1  | 0.8  | 0.42 | 3.39 | 5.57E-06 | 0.0002   | IL36RN          | interleukin 36 receptor antagonist                                                                                                     |
| 16875559 | 4.79  | 3.03 | 0.75 | 0.33 | 3.39 | 7.76E-06 | 0.0003   | RDH13           | retinol dehydrogenase 13 (all-trans/9-cis)                                                                                             |
| 16915712 | 3.47  | 1.71 | 0.44 | 0.41 | 3.38 | 2.97E-07 | 2.54E-05 | SLCO4A1         | solute carrier organic anion transporter family, member 4A1                                                                            |
| 16729323 | 3.35  | 1.61 | 0.86 | 0.34 | 3.36 | 3.48E-06 | 0.0001   | B3GNT6          | UDP-GlcNAc:betaGal beta-1,3-N-acetylglucosaminyltransferase 6                                                                          |
| 16713955 | 7.64  | 5.89 | 0.56 | 0.47 | 3.35 | 1.46E-06 | 7.70E-05 | FAM25C; FAM25C  | family with sequence similarity 25, member C; family with sequence similarity 25, member C                                             |
| 17013520 | 7.07  | 5.33 | 0.57 | 0.59 | 3.35 | 1.32E-05 | 0.0004   | SASH1           | SAM and SH3 domain containing 1                                                                                                        |
| 16925328 | 3.42  | 1.67 | 0.91 | 0.59 | 3.35 | 0.0005   | 0.007    | KCNE1           | potassium channel, voltage gated subfamily E regulatory beta subunit 1                                                                 |
| 16828108 | 8.36  | 6.63 | 0.98 | 0.56 | 3.33 | 0.0002   | 0.0032   | SNORD71         | small nucleolar RNA, C/D box 71                                                                                                        |
| 16867572 | 6.18  | 4.45 | 0.64 | 0.6  | 3.33 | 4.18E-06 | 0.0002   | FUT3            | fucosyltransferase 3 (galactoside 3(4)-L-fucosyltransferase, Lewis blood group)                                                        |
| 16709610 | 9.15  | 7.42 | 0.5  | 0.85 | 3.32 | 2.32E-05 | 0.0006   | PNLIPRP3        | pancreatic lipase-related protein 3                                                                                                    |
| 16996387 | 8.01  | 6.28 | 0.69 | 0.18 | 3.31 | 4.86E-06 | 0.0002   | MIER3           | mesoderm induction early response 1, family member 3                                                                                   |
| 16664608 | 3.72  | 2    | 0.51 | 0.27 | 3.31 | 1.22E-07 | 1.38E-05 |                 |                                                                                                                                        |
| 17009426 | 3.17  | 1.44 | 0.65 | 0.4  | 3.3  | 1.21E-06 | 6.74E-05 | ADGRF2; ADGRF4  | adhesion G protein-coupled receptor F2; adhesion G protein-coupled receptor F4                                                         |
| 17099466 | 4.89  | 3.17 | 0.74 | 0.73 | 3.29 | 2.43E-05 | 0.0006   | ABO             | ABO blood group (transferase A, alpha 1-3-N-acetylgalactosaminyltransferase; transferase B, alpha 1-3-N-acetylglucosaminyltransferase) |
| 17005223 | 4.49  | 2.78 | 0.69 | 0.71 | 3.28 | 0.0003   | 0.0048   | ID4             | inhibitor of DNA binding 4, dominant negative helix-loop-helix protein                                                                 |
| 16923239 | 4.62  | 2.91 | 0.68 | 0.31 | 3.27 | 3.08E-06 | 0.0001   | PDE9A           | phosphodiesterase 9A                                                                                                                   |
| 16881138 | 9.2   | 7.5  | 0.34 | 0.31 | 3.26 | 3.68E-09 | 1.30E-06 | MXD1            | MAX dimerization protein 1                                                                                                             |
| 16671139 | 10.19 | 8.49 | 0.39 | 0.51 | 3.26 | 2.90E-07 | 2.50E-05 | S100A9          | S100 calcium binding protein A9                                                                                                        |
| 16705220 | 2.76  | 1.06 | 0.79 | 0.17 | 3.25 | 1.24E-06 | 6.91E-05 | ZNF365          | zinc finger protein 365                                                                                                                |
| 16738803 | 7.68  | 5.98 | 0.38 | 1.61 | 3.24 | 0.0006   | 0.0073   | TCN1            | transcobalamin I (vitamin B12 binding protein, R binder family)                                                                        |
| 16976599 | 5.01  | 3.31 | 0.85 | 0.71 | 3.24 | 0.0001   | 0.0023   | SULT1B1         | sulfotransferase family 1B member 1                                                                                                    |
| 16748015 | 9.82  | 8.13 | 0.28 | 0.71 | 3.23 | 1.46E-06 | 7.69E-05 | A2ML1           | alpha-2-macroglobulin-like 1                                                                                                           |
| 16862563 | 10.46 | 8.78 | 0.48 | 0.53 | 3.21 | 4.07E-06 | 0.0002   | CEACAM6         | carcinoembryonic antigen-related cell adhesion molecule 6 (non-specific cross reacting antigen)                                        |
| 16767020 | 3.18  | 1.5  | 0.85 | 0.49 | 3.21 | 6.03E-05 | 0.0013   | C12orf56        | chromosome 12 open reading frame 56                                                                                                    |
| 16961056 | 6.77  | 5.1  | 0.85 | 0.93 | 3.2  | 0.0016   | 0.0165   | SPTSSB          | serine palmitoyltransferase, small subunit B                                                                                           |
| 16729485 | 4.67  | 3    | 0.71 | 0.22 | 3.19 | 2.55E-06 | 0.0001   | USP35           | ubiquitin specific peptidase 35                                                                                                        |
| 16792601 | 4.76  | 3.09 | 0.48 | 0.31 | 3.18 | 3.73E-08 | 6.29E-06 | LOC105378179    | uncharacterized LOC105378179                                                                                                           |
| 17124354 | 5.77  | 4.1  | 0.84 | 1.17 | 3.17 | 0.0004   | 0.0054   |                 |                                                                                                                                        |
| 16720307 | 6.3   | 4.64 | 0.59 | 0.29 | 3.17 | 2.67E-06 | 0.0001   | TMEM80          | transmembrane protein 80                                                                                                               |
| 16746546 | 5.75  | 4.09 | 0.33 | 0.62 | 3.15 | 4.94E-07 | 3.56E-05 | B4GALNT3        | beta-1,4-N-acetyl-galactosaminyl transferase 3                                                                                         |
| 16809913 | 4.72  | 3.07 | 0.47 | 0.74 | 3.14 | 1.70E-05 | 0.0005   |                 |                                                                                                                                        |
| 17001005 | 6.63  | 4.99 | 0.38 | 0.32 | 3.13 | 2.94E-08 | 5.24E-06 | PCDH1           | protocadherin 1                                                                                                                        |
| 17061545 | 4.56  | 2.92 | 0.52 | 0.48 | 3.12 | 1.61E-06 | 8.27E-05 | NAMPT           | nicotinamide phosphoribosyltransferase                                                                                                 |
| 16855244 | 2.37  | 0.73 | 0.7  | 0.28 | 3.11 | 7.34E-06 | 0.0003   | MIR4320         | microRNA 4320                                                                                                                          |
| 16861997 | 8.69  | 7.05 | 0.42 | 0.4  | 3.11 | 5.60E-07 | 3.84E-05 | ZFP36           | ZFP36 ring finger protein                                                                                                              |
| 16997275 | 6.57  | 4.94 | 0.4  | 0.3  | 3.09 | 1.58E-08 | 3.57E-06 | GCNT4           | glucosaminyl (N-acetyl) transferase 4, core 2                                                                                          |
| 16732397 | 4.48  | 2.85 | 0.61 | 0.55 | 3.09 | 9.33E-06 | 0.0003   | POU2F3          | POU class 2 homeobox 3                                                                                                                 |
| 17123814 | 2.53  | 0.91 | 1.06 | 0.15 | 3.07 | 0.0002   | 0.0031   |                 |                                                                                                                                        |
| 16698590 | 4.28  | 2.67 | 0.73 | 0.5  | 3.06 | 2.79E-05 | 0.0007   | SLC26A9         | solute carrier family 26 (anion exchanger), member 9                                                                                   |
| 16682144 | 6.27  | 4.66 | 0.61 | 0.47 | 3.05 | 1.39E-05 | 0.0004   | ANO7P1          | anoctamin 7 pseudogene 1                                                                                                               |
| 17054439 | 5.86  | 4.25 | 0.4  | 0.49 | 3.04 | 1.59E-07 | 1.63E-05 | TMEM184A        | transmembrane protein 184A                                                                                                             |
| 16874722 | 4.05  | 2.45 | 0.45 | 0.59 | 3.04 | 8.33E-06 | 0.0003   | KLK9; KLK8      | kallikrein related peptidase 9; kallikrein related peptidase 8                                                                         |
| 16992557 | 6.56  | 4.96 | 0.27 | 0.28 | 3.03 | 7.17E-10 | 5.32E-07 | CPEB4           | cytoplasmic polyadenylation element binding protein 4                                                                                  |
| 16876978 | 8.54  | 6.94 | 0.42 | 0.62 | 3.03 | 6.34E-07 | 4.22E-05 | GRHL1           | grainyhead-like transcription factor 1                                                                                                 |
| 16974493 | 3     | 1.41 | 0.52 | 0.37 | 3.02 | 4.03E-07 | 3.12E-05 | LOC105374500    | uncharacterized LOC105374500                                                                                                           |
| 16977309 | 3.55  | 1.95 | 0.54 | 0.24 | 3.02 | 3.32E-07 | 2.73E-05 | RASGEF1B        | RasGEF domain family member 1B                                                                                                         |
| 16947613 | 3.12  | 1.53 | 0.3  | 0.47 | 3.02 | 7.02E-08 | 9.52E-06 | PPM1L           | protein phosphatase, Mg2+/Mn2+ dependent, 1L                                                                                           |
| 17100201 | 6.75  | 5.16 | 0.45 | 0.58 | 3.02 | 1.72E-06 | 8.67E-05 | CLIC3           | chloride intracellular channel 3                                                                                                       |
| 16910609 | 5.99  | 4.4  | 0.51 | 0.67 | 3.02 | 3.18E-05 | 0.0008   | TRIB3           | tribbles pseudokinase 3                                                                                                                |
| 16789149 | 3.83  | 2.24 | 0.45 | 0.45 | 3.01 | 8.42E-06 | 0.0003   | TNFAIP2         | tumor necrosis factor, alpha-induced protein 2                                                                                         |
| 16992467 | 4.54  | 2.95 | 0.43 | 0.15 | 3    | 6.78E-09 | 2.07E-06 | CREBRF          | CREB3 regulatory factor                                                                                                                |
| 16975971 | 4.56  | 2.98 | 0.78 | 0.51 | 3    | 6.26E-05 | 0.0013   | LNX1            | ligand of numb-protein X 1, E3 ubiquitin protein ligase                                                                                |
| 16709136 | 2.97  | 1.4  | 0.74 | 0.26 | 2.99 | 1.15E-05 | 0.0004   |                 |                                                                                                                                        |
| 17061125 | 5.12  | 3.54 | 1.02 | 1.09 | 2.98 | 0.0028   | 0.0259   | RASA4B; RASA4   | RAS p21 protein activator 4B; RAS p21 protein activator 4                                                                              |
| 16825638 | 6.06  | 4.49 | 0.33 | 0.23 | 2.98 | 1.95E-09 | 9.20E-07 | YPFL3           | yippepe like 3                                                                                                                         |

|          |       |      |      |      |      |          |          |                            |                                                                                                            |
|----------|-------|------|------|------|------|----------|----------|----------------------------|------------------------------------------------------------------------------------------------------------|
| 16919547 | 11.47 | 9.9  | 0.22 | 0.58 | 2.97 | 1.47E-07 | 1.56E-05 | SLPI                       | secretory leukocyte peptidase inhibitor                                                                    |
| 16742647 | 2.45  | 0.88 | 0.28 | 0.22 | 2.96 | 2.58E-10 | 2.97E-07 | GAB2                       | GRB2-associated binding protein 2                                                                          |
| 17121344 | 4.43  | 2.87 | 0.68 | 0.31 | 2.95 | 6.53E-05 | 0.0013   |                            |                                                                                                            |
| 16761631 | 6.4   | 4.84 | 0.61 | 0.46 | 2.95 | 3.43E-06 | 0.0001   | DUSP16                     | dual specificity phosphatase 16                                                                            |
| 16687479 | 5.52  | 3.97 | 0.89 | 0.7  | 2.94 | 0.0002   | 0.0038   | LDLRAD1                    | low density lipoprotein receptor class A domain containing 1                                               |
| 17101341 | 4.17  | 2.62 | 0.3  | 0.44 | 2.93 | 7.72E-07 | 4.90E-05 | TBL1X                      | transducin (beta)-like 1X-linked                                                                           |
| 17098698 | 7.75  | 6.2  | 0.19 | 0.56 | 2.93 | 3.98E-08 | 6.57E-06 | FAM102A                    | family with sequence similarity 102, member A                                                              |
| 16874713 | 6.77  | 5.22 | 0.56 | 0.73 | 2.93 | 6.47E-06 | 0.0002   | KLK8                       | kallikrein related peptidase 8                                                                             |
| 16794318 | 3.51  | 1.96 | 0.34 | 0.39 | 2.93 | 7.54E-08 | 9.95E-06 | ADAM20P1                   | ADAM metallopeptidase domain 20 pseudogene 1                                                               |
| 16953321 | 2.29  | 0.75 | 1.01 | 0.16 | 2.92 | 0.0002   | 0.0037   | SPINK8                     | serine peptidase inhibitor, Kazal type 8 (putative)                                                        |
| 16976430 | 3.46  | 1.92 | 1.07 | 0.36 | 2.91 | 0.0008   | 0.0095   | GNRHR                      | gonadotropin releasing hormone receptor                                                                    |
| 16875034 | 6.72  | 5.19 | 0.47 | 0.38 | 2.9  | 1.34E-06 | 7.25E-05 | ZNF836                     | zinc finger protein 836                                                                                    |
| 16976468 | 7.06  | 5.52 | 0.6  | 0.67 | 2.9  | 8.88E-05 | 0.0017   | TMPRSS11F                  | transmembrane protease, serine 11F                                                                         |
| 16891555 | 7.13  | 5.59 | 0.64 | 0.69 | 2.9  | 9.26E-05 | 0.0018   | SGPP2                      | sphingosine-1-phosphate phosphatase 2                                                                      |
| 16733288 | 3.67  | 2.13 | 0.76 | 0.3  | 2.89 | 0.0002   | 0.0031   | ST3GAL4                    | ST3 beta-galactoside alpha-2,3-sialyltransferase 4                                                         |
| 17021596 | 4.86  | 3.34 | 0.27 | 0.7  | 2.87 | 5.95E-07 | 4.01E-05 | RRAGD                      | Ras-related GTP binding D                                                                                  |
| 16990862 | 7.22  | 5.7  | 0.65 | 1.27 | 2.87 | 0.003    | 0.0275   | ABLIM3                     | actin binding LIM protein family, member 3                                                                 |
| 16929529 | 5.93  | 4.41 | 0.37 | 0.24 | 2.87 | 1.43E-08 | 3.32E-06 | TOM1                       | target of myb1 membrane trafficking protein                                                                |
| 17118792 | 6.14  | 4.62 | 0.29 | 0.44 | 2.86 | 2.60E-08 | 4.75E-06 |                            |                                                                                                            |
| 16687875 | 7.46  | 5.94 | 0.56 | 0.4  | 2.86 | 2.24E-06 | 0.0001   | JUN                        | jun proto-oncogene                                                                                         |
| 16844026 | 3.27  | 1.76 | 0.66 | 0.37 | 2.86 | 0.0001   | 0.0022   | C17orf98                   | chromosome 17 open reading frame 98                                                                        |
| 16898578 | 9.58  | 8.07 | 0.29 | 0.18 | 2.85 | 2.16E-09 | 1.00E-06 | GFPT1                      | glutamine--fructose-6-phosphate transaminase 1                                                             |
| 16947111 | 6.87  | 5.37 | 0.65 | 0.53 | 2.84 | 1.73E-05 | 0.0005   | P2RY1                      | purinergic receptor P2Y, G-protein coupled, 1                                                              |
| 16965162 | 7.82  | 6.31 | 0.32 | 0.36 | 2.84 | 2.27E-08 | 4.36E-06 | CPEB2                      | cytoplasmic polyadenylation element binding protein 2                                                      |
| 16927082 | 3.5   | 1.99 | 0.45 | 0.45 | 2.84 | 3.27E-05 | 0.0008   | GP1BB; SEPT5               | glycoprotein Ib (platelet), beta polypeptide; septin 5                                                     |
| 17124276 | 2.05  | 0.55 | 0.79 | 0.3  | 2.83 | 4.55E-05 | 0.001    |                            |                                                                                                            |
| 17122830 | 3.24  | 1.74 | 0.65 | 0.31 | 2.83 | 3.00E-05 | 0.0007   |                            |                                                                                                            |
| 16836511 | 5.28  | 3.78 | 0.39 | 0.44 | 2.82 | 2.09E-07 | 1.97E-05 | GDPD1                      | glycerophosphodiester phosphodiesterase domain containing 1                                                |
| 17062457 | 4.05  | 2.55 | 0.4  | 0.44 | 2.82 | 5.70E-07 | 3.87E-05 |                            |                                                                                                            |
| 16934671 | 8.03  | 6.54 | 0.46 | 0.29 | 2.82 | 1.33E-06 | 7.23E-05 | TST                        | thiosulfate sulfurtransferase (rhodanese)                                                                  |
| 16698764 | 4.52  | 3.03 | 0.87 | 0.81 | 2.82 | 0.002    | 0.0199   |                            |                                                                                                            |
| 16863287 | 3.52  | 2.04 | 0.5  | 0.41 | 2.81 | 8.26E-07 | 5.18E-05 | FOSB                       | FBJ murine osteosarcoma viral oncogene homolog B                                                           |
| 17013694 | 7.14  | 5.65 | 0.37 | 0.77 | 2.8  | 6.74E-06 | 0.0002   | PLEKHG1                    | pleckstrin homology domain containing, family G (with RhoGef domain) member 1                              |
| 17123246 | 3.43  | 1.94 | 0.36 | 0.39 | 2.8  | 4.31E-07 | 3.26E-05 |                            |                                                                                                            |
| 16840417 | 4.29  | 2.8  | 0.98 | 0.53 | 2.8  | 0.0007   | 0.0086   | SLC13A5                    | solute carrier family 13 (sodium-dependent citrate transporter), member 5                                  |
| 16715529 | 6.97  | 5.49 | 0.48 | 0.36 | 2.79 | 5.11E-07 | 3.62E-05 | USP54                      | ubiquitin specific peptidase 54                                                                            |
| 17124376 | 2.77  | 1.29 | 0.93 | 0.26 | 2.79 | 0.0001   | 0.0024   |                            |                                                                                                            |
| 16709108 | 4.74  | 3.26 | 0.37 | 0.28 | 2.78 | 5.04E-08 | 7.65E-06 | MXI1                       | MAX interactor 1, dimerization protein                                                                     |
| 16922047 | 2.75  | 1.28 | 0.87 | 0.28 | 2.77 | 0.0009   | 0.0109   |                            |                                                                                                            |
| 17025005 | 5.62  | 4.15 | 0.58 | 0.34 | 2.77 | 3.24E-06 | 0.0001   | RGS17                      | regulator of G-protein signaling 17                                                                        |
| 16749939 | 2.99  | 1.52 | 0.73 | 0.47 | 2.77 | 0.0003   | 0.0049   | LRRK2                      | leucine-rich repeat kinase 2                                                                               |
| 16981606 | 5.2   | 3.73 | 0.67 | 0.7  | 2.77 | 4.61E-05 | 0.001    | HPGD                       | hydroxyprostaglandin dehydrogenase 15-(NAD)                                                                |
| 16939590 | 2.83  | 1.36 | 0.68 | 0.37 | 2.76 | 3.15E-05 | 0.0008   |                            |                                                                                                            |
| 16911261 | 5.65  | 4.19 | 0.43 | 0.6  | 2.76 | 1.46E-05 | 0.0004   | BMP2                       | bone morphogenetic protein 2                                                                               |
| 16671108 | 7.99  | 6.53 | 0.77 | 1.06 | 2.76 | 0.0001   | 0.0019   | SPRR3                      | small proline-rich protein 3                                                                               |
| 16775546 | 10.31 | 8.84 | 0.3  | 0.24 | 2.76 | 5.08E-09 | 1.64E-06 | SCEL                       | sciellin                                                                                                   |
| 16824706 | 6.35  | 4.88 | 0.32 | 0.23 | 2.76 | 2.97E-09 | 1.18E-06 | DCUN1D3; ERI2              | DCN1, defective in cullin neddylation 1, domain containing 3; ERI1 exoribonuclease family class 2 member 2 |
| 16993235 | 2.43  | 0.97 | 0.8  | 0.4  | 2.75 | 0.0003   | 0.0041   | N4BP3                      | NEDD4 binding protein 3                                                                                    |
| 16863877 | 6.49  | 5.03 | 0.41 | 0.28 | 2.75 | 7.05E-08 | 9.52E-06 | PPP1R15A                   | protein phosphatase 1, regulatory subunit 15A                                                              |
| 17023799 | 4.22  | 2.77 | 0.62 | 0.51 | 2.74 | 2.09E-05 | 0.0006   | SLC2A12                    | solute carrier family 2 (facilitated glucose transporter), member 12                                       |
| 17119076 | 4.78  | 3.33 | 0.49 | 0.87 | 2.73 | 0.0003   | 0.0049   |                            |                                                                                                            |
| 16709128 | 5.53  | 4.09 | 0.38 | 0.69 | 2.73 | 1.70E-05 | 0.0005   | DUSP5                      | dual specificity phosphatase 5                                                                             |
| 16840915 | 2.7   | 1.25 | 0.61 | 0.29 | 2.73 | 2.73E-06 | 0.0001   | LINC00324                  | long intergenic non-protein coding RNA 324                                                                 |
| 16823215 | 6.56  | 5.11 | 0.66 | 0.57 | 2.72 | 0.0001   | 0.0019   | PRSS22                     | protease, serine, 22                                                                                       |
| 16996564 | 4.83  | 3.39 | 0.54 | 0.29 | 2.72 | 5.30E-06 | 0.0002   | ELOVL7                     | ELOVL fatty acid elongase 7                                                                                |
| 16964735 | 2.9   | 1.46 | 0.65 | 0.35 | 2.72 | 3.44E-05 | 0.0008   | S100P                      | S100 calcium binding protein P                                                                             |
| 16979917 | 10.13 | 8.69 | 0.51 | 0.6  | 2.72 | 3.63E-05 | 0.0009   | SLC7A11                    | solute carrier family 7 (anionic amino acid transporter light chain, xc- system), member 1                 |
| 16975751 | 2.34  | 0.9  | 0.71 | 0.19 | 2.72 | 0.0007   | 0.0084   | TKK                        | TKK tyrosine kinase                                                                                        |
| 16998551 | 2.86  | 1.41 | 1.03 | 0.38 | 2.72 | 0.0017   | 0.0175   | SLCO4C1                    | solute carrier organic anion transporter family, member 4C1                                                |
| 16693357 | 2.2   | 0.77 | 1.1  | 0.32 | 2.71 | 0.0011   | 0.012    | SPRR2A                     | small proline-rich protein 2A                                                                              |
| 16863864 | 6.31  | 4.87 | 0.62 | 0.83 | 2.71 | 0.0007   | 0.0086   | FUT2                       | fucosyltransferase 2 (secretor status included)                                                            |
| 16902002 | 2.06  | 0.63 | 1.23 | 0.13 | 2.7  | 0.0006   | 0.0076   | IL36B                      | interleukin 36, beta                                                                                       |
| 16791219 | 10.16 | 8.72 | 0.65 | 0.76 | 2.7  | 0.0013   | 0.014    | TGM1                       | transglutaminase 1                                                                                         |
| 16762759 | 4.51  | 3.09 | 0.64 | 0.37 | 2.69 | 0.0001   | 0.0021   | TMTC1                      | transmembrane and tetrapeptide repeat containing 1                                                         |
| 16867915 | 4.48  | 3.05 | 0.73 | 0.36 | 2.69 | 1.82E-05 | 0.0005   | INSR                       | insulin receptor                                                                                           |
| 16922078 | 2.91  | 1.49 | 0.62 | 0.83 | 2.69 | 0.0011   | 0.0123   | KRTAP20-1                  | keratin associated protein 20-1                                                                            |
| 16986583 | 6.78  | 5.35 | 0.31 | 0.32 | 2.69 | 8.26E-09 | 2.33E-06 | JMY                        | junction mediating and regulatory protein, p53 cofactor                                                    |
| 16948967 | 4.16  | 2.74 | 0.64 | 0.7  | 2.68 | 0.0002   | 0.0038   | SNORD66                    | small nucleolar RNA, C/D box 66                                                                            |
| 16926111 | 3.52  | 2.1  | 0.48 | 0.2  | 2.68 | 9.70E-08 | 1.17E-05 | CBS; CBSL                  | cystathionine-beta-synthase; cystathionine-beta-synthase like                                              |
| 17064325 | 2.31  | 0.89 | 0.57 | 0.32 | 2.67 | 4.99E-06 | 0.0002   | ATG9B                      | autophagy related 9B                                                                                       |
| 16875952 | 3.35  | 1.93 | 0.74 | 0.33 | 2.67 | 3.78E-05 | 0.0009   | VN1R1                      | vomeronal 1 receptor 1                                                                                     |
| 16855111 | 3.8   | 2.38 | 0.44 | 0.55 | 2.66 | 4.16E-06 | 0.0002   | ZBTB7C                     | zinc finger and BTB domain containing 7C                                                                   |
| 17083197 | 8.56  | 7.15 | 0.16 | 0.3  | 2.66 | 1.38E-09 | 8.14E-07 | VLDLR                      | very low density lipoprotein receptor                                                                      |
| 17117424 | 5.37  | 3.97 | 0.59 | 0.44 | 2.65 | 1.52E-05 | 0.0004   | LOC100287497; LOC101926980 | uncharacterized LOC100287497; uncharacterized LOC101926980                                                 |
| 16949792 | 3.46  | 2.06 | 0.54 | 0.16 | 2.65 | 6.66E-07 | 4.39E-05 | FAM43A                     | family with sequence similarity 43, member A                                                               |
| 17120106 | 7.25  | 5.85 | 0.57 | 0.35 | 2.65 | 5.06E-06 | 0.0002   |                            |                                                                                                            |
| 16947107 | 8.12  | 6.72 | 0.53 | 0.66 | 2.64 | 4.35E-05 | 0.001    | P2RY1                      | purinergic receptor P2Y, G-protein coupled, 1                                                              |
| 16845537 | 4.63  | 3.24 | 0.49 | 0.31 | 2.63 | 6.93E-07 | 4.52E-05 | HDAC5                      | histone deacetylase 5                                                                                      |
| 16857021 | 3.67  | 2.28 | 0.74 | 0.63 | 2.63 | 0.0002   | 0.003    | TJP3                       | tight junction protein 3                                                                                   |
| 16850294 | 8.89  | 7.5  | 0.35 | 1.09 | 2.62 | 0.0002   | 0.0026   | ZNF750                     | zinc finger protein 750                                                                                    |

|          |      |      |      |      |      |          |          |                  |                                                                              |
|----------|------|------|------|------|------|----------|----------|------------------|------------------------------------------------------------------------------|
| 16801400 | 3.11 | 1.72 | 0.76 | 0.43 | 2.62 | 1.64E-05 | 0.0005   | CGNL1            | cingulin-like 1                                                              |
| 16658536 | 7.24 | 5.85 | 0.39 | 0.37 | 2.62 | 1.07E-06 | 6.15E-05 | PER3             | period circadian clock 3                                                     |
| 17061110 | 4.55 | 3.16 | 0.7  | 0.83 | 2.62 | 0.0008   | 0.0094   | RASA4B; RASA4    | RAS p21 protein activator 4B; RAS p21 protein activator 4                    |
| 16785696 | 7.11 | 5.72 | 0.45 | 0.57 | 2.61 | 1.65E-05 | 0.0005   | ARG2             | arginase 2                                                                   |
| 17118269 | 4.88 | 3.49 | 0.87 | 0.59 | 2.61 | 0.0019   | 0.0192   |                  |                                                                              |
| 17072601 | 6.67 | 5.29 | 0.14 | 0.33 | 2.61 | 3.11E-09 | 1.21E-06 | TRIB1            | tribbles pseudokinase 1                                                      |
| 16857676 | 4.93 | 3.55 | 0.4  | 0.17 | 2.6  | 3.19E-08 | 5.55E-06 | CAMSAP3          | calmodulin regulated spectrin-associated protein family, member 3            |
| 16880291 | 4.83 | 3.45 | 0.84 | 0.78 | 2.6  | 0.0002   | 0.0029   |                  |                                                                              |
| 16800630 | 2.56 | 1.18 | 0.97 | 0.3  | 2.6  | 0.0003   | 0.0048   | C15orf48; MIR147 | chromosome 15 open reading frame 48; microRNA 147b                           |
| 17124314 | 2.12 | 0.75 | 1    | 0.23 | 2.59 | 0.0008   | 0.0098   |                  |                                                                              |
| 16938378 | 7.18 | 5.8  | 0.25 | 0.48 | 2.59 | 5.03E-07 | 3.59E-05 | NR1D2            | nuclear receptor subfamily 1, group D, member 2                              |
| 16781648 | 3.44 | 2.06 | 0.58 | 0.47 | 2.59 | 4.36E-05 | 0.001    | SLC39A2          | solute carrier family 39 (zinc transporter), member 2                        |
| 16775498 | 2.17 | 0.8  | 0.65 | 0.66 | 2.58 | 0.0015   | 0.0157   | LMO7DN-IT1       | LMO7DN intronic transcript 1                                                 |
| 16847343 | 2.43 | 1.07 | 0.74 | 0.23 | 2.58 | 2.35E-05 | 0.0006   | WFDC21P          | WAP four-disulfide core domain 21, pseudogene                                |
| 16819909 | 4.31 | 2.95 | 0.51 | 0.72 | 2.57 | 0.0001   | 0.0023   | CES3             | carboxylesterase 3                                                           |
| 17079317 | 7.31 | 5.96 | 0.22 | 0.39 | 2.56 | 2.14E-08 | 4.30E-06 | TP53INP1         | tumor protein p53 inducible nuclear protein 1                                |
| 16700515 | 5.18 | 3.83 | 0.38 | 0.7  | 2.56 | 4.37E-05 | 0.001    | SIPA1L2          | signal-induced proliferation-associated 1 like 2                             |
| 16752397 | 6.01 | 4.66 | 0.54 | 0.32 | 2.56 | 2.52E-06 | 0.0001   | ERBB3            | erb-b2 receptor tyrosine kinase 3                                            |
| 16704865 | 2.79 | 1.43 | 0.99 | 0.39 | 2.56 | 0.0012   | 0.0128   | MSMB             | microseminoprotein, beta-                                                    |
| 17100651 | 9.73 | 8.38 | 0.79 | 0.49 | 2.56 | 0.0007   | 0.009    |                  |                                                                              |
| 16876842 | 4.04 | 2.69 | 0.72 | 0.7  | 2.56 | 0.0002   | 0.0036   | LOC105373416     | uncharacterized LOC105373416                                                 |
| 16907904 | 4.01 | 2.65 | 0.55 | 0.39 | 2.55 | 4.66E-05 | 0.001    | LOC105373862     | uncharacterized LOC105373862                                                 |
| 16912965 | 5.11 | 3.76 | 0.55 | 0.33 | 2.55 | 6.22E-06 | 0.0002   | TP53INP2         | tumor protein p53 inducible nuclear protein 2                                |
| 16729336 | 5.61 | 4.26 | 0.65 | 0.47 | 2.55 | 6.80E-05 | 0.0014   | CAPN5            | calpain 5                                                                    |
| 17072439 | 5.1  | 3.76 | 0.57 | 1.02 | 2.54 | 0.0018   | 0.0185   | FER1L6           | fer-1-like family member 6                                                   |
| 16987528 | 6.98 | 5.63 | 0.35 | 0.61 | 2.54 | 5.08E-06 | 0.0002   | LOC102724748     | uncharacterized LOC102724748                                                 |
| 16680034 | 3.31 | 1.96 | 0.72 | 0.5  | 2.54 | 5.32E-05 | 0.0011   | RNF223           | ring finger protein 223                                                      |
| 16960807 | 8.2  | 6.86 | 0.41 | 0.11 | 2.54 | 4.61E-07 | 3.40E-05 | CCNL1            | cyclin L1                                                                    |
| 16807519 | 5.49 | 4.14 | 0.46 | 1.05 | 2.54 | 0.0004   | 0.0054   | RHOV             | ras homolog family member V                                                  |
| 16666545 | 8.26 | 6.92 | 0.39 | 0.4  | 2.54 | 2.44E-06 | 0.0001   | ADGRL2           | adhesion G protein-coupled receptor L2                                       |
| 16938973 | 4.91 | 3.57 | 0.67 | 0.45 | 2.53 | 6.36E-05 | 0.0013   | C3orf35          | chromosome 3 open reading frame 35                                           |
| 16842147 | 3.07 | 1.73 | 0.91 | 0.45 | 2.53 | 0.0004   | 0.0058   | CCDC144B         | coiled-coil domain containing 144B (pseudogene)                              |
| 16676498 | 2.54 | 1.2  | 1.39 | 0.26 | 2.53 | 0.0053   | 0.0425   | MFSD4            | major facilitator superfamily domain containing 4                            |
| 17016787 | 4.81 | 3.48 | 0.73 | 0.36 | 2.53 | 0.0002   | 0.0027   | RNF39            | ring finger protein 39                                                       |
| 17026593 | 4.81 | 3.48 | 0.73 | 0.36 | 2.53 | 0.0002   | 0.0027   |                  |                                                                              |
| 17031459 | 4.81 | 3.48 | 0.73 | 0.36 | 2.53 | 0.0002   | 0.0027   |                  |                                                                              |
| 17036198 | 4.81 | 3.48 | 0.73 | 0.36 | 2.53 | 0.0002   | 0.0027   |                  |                                                                              |
| 17041542 | 4.81 | 3.48 | 0.73 | 0.36 | 2.53 | 0.0002   | 0.0027   |                  |                                                                              |
| 16969711 | 3.35 | 2.01 | 0.85 | 0.74 | 2.53 | 0.0016   | 0.0164   | RRH              | retinal pigment epithelium-derived rhodopsin homolog                         |
| 17017049 | 3.7  | 2.36 | 0.93 | 0.6  | 2.52 | 0.0002   | 0.0028   | C6orf15          | chromosome 6 open reading frame 15                                           |
| 17031716 | 3.7  | 2.36 | 0.93 | 0.6  | 2.52 | 0.0002   | 0.0028   |                  |                                                                              |
| 17034168 | 3.7  | 2.36 | 0.93 | 0.6  | 2.52 | 0.0002   | 0.0028   |                  |                                                                              |
| 17036418 | 3.7  | 2.36 | 0.93 | 0.6  | 2.52 | 0.0002   | 0.0028   |                  |                                                                              |
| 16762107 | 2.28 | 0.95 | 0.96 | 0.17 | 2.52 | 0.0005   | 0.0066   | GYS2             | glycogen synthase 2 (liver)                                                  |
| 16872223 | 4.18 | 2.85 | 0.59 | 0.43 | 2.51 | 0.0001   | 0.0021   |                  |                                                                              |
| 17121266 | 4.12 | 2.79 | 0.99 | 0.51 | 2.51 | 0.0022   | 0.0217   |                  |                                                                              |
| 16821479 | 6.03 | 4.7  | 0.54 | 0.26 | 2.51 | 2.37E-05 | 0.0006   | ATP2C2           | ATPase, Ca++ transporting, type 2C, member 2                                 |
| 17061108 | 3.47 | 2.15 | 0.67 | 0.43 | 2.5  | 0.0003   | 0.0046   | RASA4B; RASA4    | RAS p21 protein activator 4B; RAS p21 protein activator 4                    |
| 17118039 | 3.57 | 2.25 | 0.84 | 0.41 | 2.5  | 0.001    | 0.0112   | LOC100507209     | uncharacterized LOC100507209                                                 |
| 17100420 | 3.89 | 2.57 | 0.42 | 0.51 | 2.49 | 1.30E-05 | 0.0004   | NRARP            | NOTCH-regulated ankyrin repeat protein                                       |
| 17010789 | 6.25 | 4.94 | 0.5  | 0.12 | 2.49 | 2.80E-06 | 0.0001   | ZNF292           | zinc finger protein 292                                                      |
| 17050171 | 4.08 | 2.77 | 0.45 | 0.19 | 2.49 | 6.43E-07 | 4.27E-05 | HBP1             | HMG-box transcription factor 1                                               |
| 16697599 | 6.51 | 5.21 | 0.38 | 0.35 | 2.48 | 3.44E-07 | 2.80E-05 | DENN1D1B         | DENN/MADD domain containing 1B                                               |
| 17113053 | 2.89 | 1.59 | 0.63 | 0.32 | 2.47 | 1.96E-05 | 0.0005   | LOC286437        | uncharacterized LOC286437                                                    |
| 16958786 | 3.99 | 2.69 | 0.58 | 0.28 | 2.47 | 8.20E-06 | 0.0003   | MGLL             | monoglyceride lipase                                                         |
| 17009573 | 2.94 | 1.63 | 0.71 | 0.23 | 2.47 | 0.0003   | 0.0048   | PAQR8            | progesterin and adipoQ receptor family member VIII                           |
| 16776045 | 5.06 | 3.76 | 0.52 | 0.4  | 2.46 | 5.10E-05 | 0.0011   |                  |                                                                              |
| 16981848 | 2.65 | 1.35 | 0.77 | 0.49 | 2.46 | 0.0002   | 0.0026   |                  |                                                                              |
| 17096379 | 3.72 | 2.42 | 0.71 | 0.36 | 2.46 | 6.35E-05 | 0.0013   | LOC105376171     | uncharacterized LOC105376171                                                 |
| 16875014 | 8.07 | 6.78 | 0.24 | 0.28 | 2.45 | 4.43E-09 | 1.48E-06 | ZNF841; ZNF432   | zinc finger protein 841; zinc finger protein 432                             |
| 16660757 | 8.16 | 6.86 | 0.45 | 0.69 | 2.45 | 5.96E-05 | 0.0013   | GRHL3            | grainyhead-like transcription factor 3                                       |
| 17085635 | 3.09 | 1.8  | 0.3  | 0.31 | 2.45 | 1.13E-07 | 1.30E-05 | PIPSK1B          | phosphatidylinositol-4-phosphate 5-kinase, type I, beta                      |
| 16871346 | 2.63 | 1.34 | 0.5  | 0.14 | 2.45 | 4.98E-07 | 3.57E-05 | LOC101927522     | uncharacterized LOC101927522                                                 |
| 17122212 | 3.7  | 2.41 | 0.76 | 0.28 | 2.45 | 3.00E-05 | 0.0007   |                  |                                                                              |
| 17004657 | 2.11 | 0.82 | 1.06 | 0.24 | 2.45 | 0.002    | 0.0201   | BMP6             | bone morphogenetic protein 6                                                 |
| 17069550 | 4.19 | 2.9  | 0.88 | 0.32 | 2.45 | 0.0002   | 0.0034   | ADHFE1; C8orf46  | alcohol dehydrogenase, iron containing 1; chromosome 8 open reading frame 46 |
| 17019484 | 6.12 | 4.83 | 0.21 | 0.13 | 2.45 | 4.32E-11 | 1.39E-07 | GTPBP2           | GTP binding protein 2                                                        |
| 16841657 | 2.77 | 1.48 | 0.41 | 0.49 | 2.45 | 7.21E-05 | 0.0015   |                  |                                                                              |
| 16990379 | 3.72 | 2.43 | 0.86 | 0.31 | 2.45 | 0.0009   | 0.0107   | PCDHGB8P         | protocadherin gamma subfamily B, 8 pseudogene                                |
| 17124318 | 2.09 | 0.8  | 0.96 | 0.21 | 2.45 | 0.0006   | 0.0082   |                  |                                                                              |
| 16839519 | 5.18 | 3.89 | 0.57 | 0.66 | 2.45 | 0.0001   | 0.002    | TLCD2            | TLC domain containing 2                                                      |
| 17092512 | 7.92 | 6.63 | 0.49 | 0.33 | 2.44 | 6.44E-06 | 0.0002   | ZDHHC21          | zinc finger, DHHC-type containing 21                                         |
| 17000520 | 6.23 | 4.94 | 0.51 | 0.41 | 2.44 | 3.06E-06 | 0.0001   | SNORD63          | small nucleolar RNA, C/D box 63                                              |
| 16900084 | 4.4  | 3.12 | 0.35 | 0.84 | 2.43 | 0.0001   | 0.0023   | IGKV1-5          | immunoglobulin kappa variable 1-5                                            |
| 17123810 | 2.48 | 1.2  | 0.66 | 0.17 | 2.43 | 0.0002   | 0.003    |                  |                                                                              |
| 16920857 | 6.59 | 5.31 | 0.15 | 0.27 | 2.43 | 2.35E-09 | 1.05E-06 | PPP1R3D          | protein phosphatase 1, regulatory subunit 3D                                 |
| 16971966 | 6.17 | 4.89 | 0.54 | 0.38 | 2.43 | 3.40E-05 | 0.0008   | FNIP2            | folliculin interacting protein 2                                             |
| 17061117 | 2.46 | 1.18 | 1.03 | 0.49 | 2.43 | 0.0025   | 0.0234   | RASA4B; RASA4    | RAS p21 protein activator 4B; RAS p21 protein activator 4                    |
| 16872990 | 4.34 | 3.06 | 0.31 | 0.29 | 2.42 | 4.94E-08 | 7.64E-06 | PHLDB3           | pleckstrin homology-like domain, family B, member 3                          |
| 16977159 | 6.15 | 4.87 | 0.31 | 0.47 | 2.42 | 1.91E-06 | 9.38E-05 | SOWAHB           | sonosdown ankryin repeat domain family member B                              |

|          |       |       |      |      |      |          |          |                |                                                                                             |
|----------|-------|-------|------|------|------|----------|----------|----------------|---------------------------------------------------------------------------------------------|
| 16767666 | 1.96  | 0.69  | 0.79 | 0.2  | 2.42 | 8.19E-05 | 0.0016   | KCNC2          | potassium channel, voltage gated Shaw related subfamily C, member 2                         |
| 17065650 | 2.74  | 1.46  | 0.42 | 0.3  | 2.42 | 9.88E-07 | 5.87E-05 |                |                                                                                             |
| 17045592 | 2.61  | 1.33  | 0.35 | 0.27 | 2.42 | 4.95E-08 | 7.64E-06 | LINC00957      | long intergenic non-protein coding RNA 957                                                  |
| 17118260 | 2.68  | 1.4   | 0.61 | 0.55 | 2.42 | 0.0001   | 0.0022   | LOC84214       | uncharacterized LOC84214                                                                    |
| 16660103 | 4.19  | 2.92  | 0.54 | 0.44 | 2.42 | 5.80E-05 | 0.0012   | ARHGEF10L      | Rho guanine nucleotide exchange factor 10 like                                              |
| 17092003 | 2.31  | 1.04  | 0.63 | 0.21 | 2.42 | 9.82E-05 | 0.0019   | VLDLR-AS1      | VLDLR antisense RNA 1                                                                       |
| 16925442 | 4.35  | 3.08  | 0.4  | 0.39 | 2.41 | 2.36E-05 | 0.0006   | CBR3-AS1       | CBR3 antisense RNA 1                                                                        |
| 16874778 | 2.17  | 0.9   | 1.24 | 0.31 | 2.41 | 0.0026   | 0.024    | KLK14          | kallikrein related peptidase 14                                                             |
| 16670574 | 7.65  | 6.38  | 0.36 | 0.26 | 2.41 | 1.01E-07 | 1.20E-05 | ECM1           | extracellular matrix protein 1                                                              |
| 17019190 | 6.98  | 5.72  | 0.47 | 0.26 | 2.41 | 4.87E-06 | 0.0002   | C6orf132       | chromosome 6 open reading frame 132                                                         |
| 16915457 | 6.43  | 5.17  | 0.84 | 0.37 | 2.4  | 0.0021   | 0.0206   | CDH26          | cadherin 26                                                                                 |
| 17121932 | 3.14  | 1.87  | 0.99 | 0.3  | 2.4  | 0.0004   | 0.0058   |                |                                                                                             |
| 16731068 | 2.53  | 1.27  | 0.57 | 0.42 | 2.4  | 5.68E-05 | 0.0012   | LAYN           | layilin                                                                                     |
| 16903552 | 4.45  | 3.19  | 0.7  | 0.36 | 2.4  | 0.0001   | 0.0021   | NEB            | nebulin                                                                                     |
| 16860691 | 6.76  | 5.5   | 0.27 | 0.16 | 2.39 | 2.77E-09 | 1.15E-06 | KIAA0355       | KIAA0355                                                                                    |
| 16881838 | 7.96  | 6.71  | 0.34 | 0.1  | 2.38 | 1.54E-08 | 3.49E-06 | HK2            | hexokinase 2                                                                                |
| 17123530 | 2.21  | 0.96  | 0.66 | 0.15 | 2.38 | 5.04E-05 | 0.0011   |                |                                                                                             |
| 16985704 | 7.33  | 6.08  | 0.33 | 0.52 | 2.38 | 5.19E-06 | 0.0002   | OCLN           | occludin                                                                                    |
| 16863820 | 7.88  | 6.63  | 0.32 | 0.74 | 2.38 | 4.11E-05 | 0.0009   | SULT2B1        | sulfotransferase family 2B member 1                                                         |
| 16942202 | 7.15  | 5.9   | 0.42 | 0.32 | 2.38 | 3.09E-07 | 2.60E-05 | PXK            | PX domain containing serine/threonine kinase                                                |
| 16920169 | 8.52  | 7.28  | 0.51 | 0.35 | 2.38 | 1.28E-05 | 0.0004   | B4GALT5        | UDP-Gal:betaGlcNAc beta 1,4- galactosyltransferase, polypeptide 5                           |
| 17096285 | 8.33  | 7.08  | 0.57 | 0.34 | 2.38 | 2.95E-05 | 0.0007   | CTSV           | cathepsin V                                                                                 |
| 16803197 | 4.93  | 3.69  | 0.38 | 0.42 | 2.37 | 1.14E-06 | 6.49E-05 | NEIL1          | nei-like DNA glycosylase 1                                                                  |
| 17063221 | 2.01  | 0.77  | 0.79 | 0.15 | 2.37 | 0.0002   | 0.0029   | FAM180A        | family with sequence similarity 180, member A                                               |
| 16854594 | 6.96  | 5.72  | 0.51 | 0.51 | 2.37 | 3.19E-05 | 0.0008   | GAREM1         | GRB2 associated regulator of MAPK1 1                                                        |
| 16849047 | 6.25  | 5.01  | 0.43 | 0.5  | 2.37 | 3.63E-06 | 0.0002   | EVPL           | envoplakin                                                                                  |
| 17013279 | 2.83  | 1.59  | 0.4  | 0.31 | 2.37 | 2.81E-06 | 0.0001   | STX11          | syntaxin 11                                                                                 |
| 16949062 | 5.03  | 3.79  | 0.29 | 0.8  | 2.36 | 7.02E-05 | 0.0014   | EPHB3          | EPH receptor B3                                                                             |
| 17124312 | 1.86  | 0.62  | 0.69 | 0.07 | 2.36 | 3.89E-05 | 0.0009   |                |                                                                                             |
| 17106051 | 7.89  | 6.66  | 0.3  | 0.15 | 2.36 | 1.04E-08 | 2.73E-06 | MID2           | midline 2                                                                                   |
| 17038957 | 3.59  | 2.35  | 0.84 | 0.76 | 2.36 | 0.0035   | 0.0309   |                |                                                                                             |
| 16972750 | 6.26  | 5.02  | 0.51 | 0.27 | 2.36 | 1.42E-05 | 0.0004   | CDKN2AIP       | CDKN2A interacting protein                                                                  |
| 16757766 | 3.07  | 1.83  | 0.55 | 0.4  | 2.36 | 7.65E-06 | 0.0003   | HSPB8          | heat shock 22kDa protein 8                                                                  |
| 16729168 | 3.13  | 1.89  | 0.47 | 0.24 | 2.36 | 1.25E-06 | 6.94E-05 | DGAT2          | diacylglycerol O-acyltransferase 2                                                          |
| 16971660 | 3.28  | 2.05  | 0.45 | 0.48 | 2.35 | 1.37E-05 | 0.0004   | LRAT           | lecithin retinol acyltransferase (phosphatidylcholine--retinol O-acyltransferase)           |
| 16907912 | 5.85  | 4.62  | 0.52 | 0.4  | 2.35 | 6.59E-05 | 0.0014   | IKZF2          | IKAROS family zinc finger 2                                                                 |
| 16810133 | 3.17  | 1.95  | 0.4  | 0.17 | 2.34 | 7.36E-08 | 9.84E-06 | RORA           | RAR-related orphan receptor A                                                               |
| 16963094 | 3.85  | 2.62  | 0.41 | 0.25 | 2.34 | 4.06E-07 | 3.13E-05 |                |                                                                                             |
| 16801624 | 2.83  | 1.61  | 0.37 | 0.39 | 2.34 | 1.30E-06 | 7.15E-05 |                |                                                                                             |
| 16675034 | 2.14  | 0.92  | 0.8  | 0.68 | 2.34 | 0.0039   | 0.0334   |                |                                                                                             |
| 16926253 | 11.34 | 10.12 | 0.23 | 0.42 | 2.33 | 1.00E-06 | 5.90E-05 | CSTB           | cystatin B (stefin B)                                                                       |
| 17000518 | 3.66  | 2.43  | 0.52 | 0.51 | 2.33 | 0.0001   | 0.0021   | HSPA9          | heat shock 70kDa protein 9 (mortalin)                                                       |
| 16847878 | 3.71  | 2.49  | 0.49 | 0.5  | 2.33 | 1.65E-05 | 0.0005   | PLEKHM1P       | pleckstrin homology domain containing, family M (with RUN domain) member 1 pseudogene       |
| 17028680 | 4.37  | 3.16  | 0.75 | 0.3  | 2.33 | 0.0002   | 0.0037   |                |                                                                                             |
| 16786587 | 6.28  | 5.06  | 0.8  | 0.61 | 2.33 | 0.0048   | 0.0391   | FOS            | FBJ murine osteosarcoma viral oncogene homolog                                              |
| 17061127 | 6.89  | 5.68  | 0.71 | 1.15 | 2.32 | 0.0025   | 0.0235   | RASA4B; RASA4  | RAS p21 protein activator 4B; RAS p21 protein activator 4                                   |
| 17003180 | 4.96  | 3.74  | 0.46 | 0.42 | 2.32 | 2.56E-05 | 0.0007   | RAB24; MXD3    | RAB24, member RAS oncogene family; MAX dimerization protein 3                               |
| 17097209 | 3.09  | 1.88  | 0.67 | 0.51 | 2.32 | 0.0019   | 0.0187   |                |                                                                                             |
| 17112607 | 8.5   | 7.28  | 0.58 | 0.19 | 2.32 | 7.48E-06 | 0.0003   | TSPAN6         | tetraspanin 6                                                                               |
| 16691214 | 7.85  | 6.64  | 0.2  | 0.42 | 2.32 | 5.49E-07 | 3.79E-05 | DENND2C        | DENN/MADD domain containing 2C                                                              |
| 16707744 | 1.99  | 0.78  | 0.76 | 0.28 | 2.32 | 0.0003   | 0.0047   | CYP2C19        | cytochrome P450, family 2, subfamily C, polypeptide 19                                      |
| 16809549 | 2.31  | 1.09  | 1.13 | 0.3  | 2.32 | 0.0029   | 0.0264   | WDR72          | WD repeat domain 72                                                                         |
| 16690566 | 8.69  | 7.47  | 0.39 | 0.45 | 2.32 | 1.10E-05 | 0.0003   | SORT1          | sortilin 1                                                                                  |
| 16972507 | 2.74  | 1.53  | 1.03 | 0.34 | 2.32 | 0.0002   | 0.0034   | LOC102723627   | uncharacterized LOC102723627                                                                |
| 16916407 | 6.4   | 5.19  | 0.54 | 0.34 | 2.31 | 2.50E-05 | 0.0006   | FKBP1A; SDCBP2 | FK506 binding protein 1A; syndecan binding protein (syntenin) 2; FKBP1A-SDCBP2 read-through |
| 17010604 | 3.33  | 2.12  | 0.91 | 0.57 | 2.31 | 0.002    | 0.0199   |                |                                                                                             |
| 16669278 | 3.15  | 1.94  | 1.06 | 0.38 | 2.31 | 0.0043   | 0.0358   | FAM46C         | family with sequence similarity 46, member C                                                |
| 16997636 | 2.86  | 1.65  | 0.47 | 0.67 | 2.31 | 0.0002   | 0.0037   |                |                                                                                             |
| 16885976 | 4.43  | 3.22  | 0.62 | 0.63 | 2.31 | 0.0008   | 0.0096   |                |                                                                                             |
| 16834176 | 3.48  | 2.28  | 0.84 | 0.39 | 2.31 | 0.0008   | 0.01     |                |                                                                                             |
| 16862959 | 3.17  | 1.96  | 0.43 | 0.3  | 2.31 | 3.61E-06 | 0.0002   | LOC105372415   | uncharacterized LOC105372415                                                                |
| 16823169 | 3.81  | 2.6   | 0.76 | 0.54 | 2.31 | 0.0007   | 0.0089   | PRSS27         | protease, serine 27                                                                         |
| 16883647 | 4.6   | 3.4   | 0.52 | 0.47 | 2.31 | 0.0003   | 0.0045   | IL1R1          | interleukin 1 receptor, type I                                                              |
| 16823263 | 3.42  | 2.22  | 0.32 | 0.37 | 2.31 | 1.31E-06 | 7.17E-05 | CCDC64B        | coiled-coil domain containing 64B                                                           |
| 16844817 | 9.77  | 8.57  | 0.32 | 0.94 | 2.3  | 0.0002   | 0.0035   | KRT16          | keratin 16, type I                                                                          |
| 17083557 | 1.96  | 0.76  | 0.81 | 0.41 | 2.29 | 0.0021   | 0.0202   | LOC105375969   | uncharacterized LOC105375969                                                                |
| 16884629 | 8.7   | 7.5   | 0.29 | 0.28 | 2.29 | 3.50E-08 | 5.92E-06 | IL1RN          | interleukin 1 receptor antagonist                                                           |
| 16803642 | 2.65  | 1.46  | 0.53 | 0.36 | 2.29 | 5.45E-05 | 0.0012   | KIAA1024       | KIAA1024                                                                                    |
| 16659904 | 3.59  | 2.39  | 0.72 | 0.46 | 2.29 | 0.0032   | 0.0286   |                |                                                                                             |
| 16840054 | 5.26  | 4.07  | 0.68 | 0.92 | 2.29 | 0.0033   | 0.0293   | GGT6           | gamma-glutamyltransferase 6                                                                 |
| 16939419 | 6.29  | 5.1   | 0.58 | 0.84 | 2.28 | 0.0004   | 0.0054   |                |                                                                                             |
| 17125022 | 3.23  | 2.04  | 0.45 | 0.23 | 2.28 | 7.05E-06 | 0.0003   |                |                                                                                             |
| 17125794 | 4.69  | 3.51  | 0.31 | 0.43 | 2.28 | 2.51E-06 | 0.0001   |                |                                                                                             |
| 16809872 | 2.34  | 1.15  | 0.6  | 0.72 | 2.27 | 0.0043   | 0.0363   | LOC101928635   | uncharacterized LOC101928635                                                                |
| 16979133 | 7.18  | 6     | 0.29 | 0.35 | 2.27 | 1.22E-07 | 1.38E-05 | CAMK2D         | calcium/calmodulin-dependent protein kinase II delta                                        |
| 16877847 | 5.79  | 4.61  | 0.25 | 0.26 | 2.27 | 1.72E-08 | 3.70E-06 |                |                                                                                             |
| 16777794 | 8.08  | 6.89  | 0.36 | 0.15 | 2.27 | 8.22E-08 | 1.04E-05 | UBL3           | ubiquitin-like 3                                                                            |
| 17047738 | 4.53  | 3.34  | 0.65 | 0.52 | 2.27 | 0.0015   | 0.0155   | LOC105375368   | uncharacterized LOC105375368                                                                |
| 16912127 | 7.24  | 6.06  | 0.53 | 0.79 | 2.27 | 0.0022   | 0.0213   | LOC105372578   | uncharacterized LOC105372578                                                                |
| 17125034 | 7.93  | 6.75  | 0.47 | 0.25 | 2.27 | 2.01E-06 | 9.78E-05 |                |                                                                                             |

|          |       |      |      |      |      |          |          |                |                                                                                     |
|----------|-------|------|------|------|------|----------|----------|----------------|-------------------------------------------------------------------------------------|
| 16678114 | 6.06  | 4.88 | 0.48 | 0.41 | 2.27 | 1.72E-05 | 0.0005   | EPHX1          | epoxide hydrolase 1, microsomal (xenobiotic)                                        |
| 17104201 | 3.48  | 2.3  | 0.65 | 0.33 | 2.26 | 0.002    | 0.0197   | FAAH2          | fatty acid amide hydrolase 2                                                        |
| 16959575 | 4.64  | 3.46 | 0.54 | 0.37 | 2.26 | 5.53E-05 | 0.0012   |                |                                                                                     |
| 16676619 | 5.58  | 4.41 | 0.19 | 0.22 | 2.26 | 2.58E-09 | 1.10E-06 | RASSF5         | Ras association (RalGDS/AF-6) domain family member 5                                |
| 16708796 | 4.52  | 3.35 | 0.44 | 0.49 | 2.26 | 5.20E-05 | 0.0011   | INA            | interneuron neuronal intermediate filament protein, alpha                           |
| 16713318 | 10.02 | 8.84 | 0.41 | 0.29 | 2.26 | 1.17E-06 | 6.61E-05 |                |                                                                                     |
| 16718232 | 4.46  | 3.29 | 0.34 | 0.24 | 2.26 | 2.86E-07 | 2.48E-05 | ITPRIP         | inositol 1,4,5-trisphosphate receptor interacting protein                           |
| 16854486 | 10.95 | 9.77 | 0.25 | 0.44 | 2.26 | 1.50E-06 | 7.84E-05 | DSC2           | desmocollin 2                                                                       |
| 17024700 | 2.67  | 1.5  | 0.84 | 0.49 | 2.25 | 0.0021   | 0.0202   | RAET1L         | retinoic acid early transcript 1L                                                   |
| 17033915 | 4.73  | 3.56 | 0.79 | 0.27 | 2.25 | 0.0004   | 0.0059   |                |                                                                                     |
| 17022588 | 6.52  | 5.35 | 0.18 | 0.37 | 2.25 | 1.57E-07 | 1.62E-05 | CDK19          | cyclin-dependent kinase 19                                                          |
| 16963097 | 2.6   | 1.43 | 0.5  | 0.67 | 2.25 | 0.0004   | 0.0057   |                |                                                                                     |
| 17100679 | 8.37  | 7.2  | 0.59 | 0.22 | 2.25 | 1.30E-05 | 0.0004   |                |                                                                                     |
| 16666959 | 3.22  | 2.05 | 0.65 | 0.4  | 2.25 | 0.0002   | 0.0031   | GBP1P1         | guanylate binding protein 1, interferon-inducible pseudogene 1                      |
| 16877007 | 5.97  | 4.8  | 0.43 | 0.23 | 2.24 | 1.07E-06 | 6.15E-05 | KLF11          | Kruppel-like factor 11                                                              |
| 16790360 | 5.03  | 3.87 | 0.36 | 0.63 | 2.24 | 0.0004   | 0.0054   | SNORD9         | small nucleolar RNA, C/D box 9                                                      |
| 16956285 | 2.87  | 1.7  | 0.41 | 0.3  | 2.24 | 5.85E-07 | 3.95E-05 | PDZRN3         | PDZ domain containing ring finger 3                                                 |
| 16866065 | 5.46  | 4.3  | 0.31 | 0.58 | 2.23 | 7.42E-05 | 0.0015   | ZNF773         | zinc finger protein 773                                                             |
| 16836624 | 7.56  | 6.4  | 0.39 | 0.44 | 2.23 | 1.32E-05 | 0.0004   | MIR21; VMP1    | microRNA 21; vacuole membrane protein 1                                             |
| 16792483 | 2.15  | 0.99 | 0.67 | 0.29 | 2.23 | 0.0002   | 0.003    |                |                                                                                     |
| 16908897 | 6.56  | 5.4  | 0.41 | 1.21 | 2.23 | 0.0017   | 0.0178   | EPHA4          | EPH receptor A4                                                                     |
| 16980470 | 2.88  | 1.73 | 0.64 | 0.33 | 2.23 | 0.0001   | 0.0019   | NR3C2          | nuclear receptor subfamily 3, group C, member 2                                     |
| 16824166 | 6.11  | 4.95 | 0.27 | 0.73 | 2.23 | 0.0004   | 0.0057   | PKD1P6; NPPIP1 | polycystic kidney disease 1 (autosomal dominant) pseudogene 6; nuclear pore comple  |
| 16819689 | 2.73  | 1.57 | 0.72 | 0.38 | 2.23 | 0.0018   | 0.0185   | NDRG4          | NDRG family member 4                                                                |
| 16765226 | 5.32  | 4.17 | 0.39 | 0.46 | 2.23 | 6.34E-06 | 0.0002   | ITGB7          | integrin beta 7                                                                     |
| 16929920 | 8.73  | 7.57 | 0.3  | 0.3  | 2.23 | 4.99E-07 | 3.58E-05 | H1F0           | H1 histone family, member 0                                                         |
| 16774851 | 5.18  | 4.02 | 0.35 | 0.33 | 2.23 | 6.41E-07 | 4.26E-05 | KCNRG; TRIM13  | potassium channel regulator; tripartite motif containing 13                         |
| 16747211 | 4.38  | 3.23 | 0.21 | 0.44 | 2.22 | 4.67E-07 | 3.42E-05 | PLEKHG6        | pleckstrin homology domain containing, family G (with RhoGef domain) member 6       |
| 16700806 | 7.43  | 6.28 | 0.29 | 0.34 | 2.22 | 9.58E-07 | 5.72E-05 | LYST           | lysosomal trafficking regulator                                                     |
| 16711731 | 7.59  | 6.44 | 0.45 | 0.13 | 2.22 | 8.92E-07 | 5.47E-05 | USP6NL         | USP6 N-terminal like                                                                |
| 16990312 | 1.58  | 0.43 | 0.59 | 0.27 | 2.22 | 5.39E-05 | 0.0012   | PCDHB13        | protocadherin beta 13                                                               |
| 17096827 | 5.83  | 4.68 | 0.46 | 0.49 | 2.22 | 3.46E-05 | 0.0008   | KLF4           | Kruppel-like factor 4 (gut)                                                         |
| 17104159 | 7.06  | 5.91 | 0.45 | 0.53 | 2.22 | 3.60E-05 | 0.0008   | KLF8           | Kruppel-like factor 8                                                               |
| 16909162 | 3.46  | 2.31 | 0.56 | 0.55 | 2.22 | 0.0014   | 0.0153   | LOC105373913   | uncharacterized LOC105373913                                                        |
| 16869506 | 4.3   | 3.15 | 0.49 | 0.4  | 2.21 | 8.02E-06 | 0.0003   | PODNL1         | podocan-like 1                                                                      |
| 16935455 | 3.53  | 2.38 | 0.4  | 0.17 | 2.21 | 2.98E-06 | 0.0001   | PMM1           | phosphomannomutase 1                                                                |
| 16974482 | 2.33  | 1.19 | 0.49 | 0.26 | 2.21 | 1.50E-06 | 7.83E-05 | LOC101929095   | uncharacterized LOC101929095                                                        |
| 16711750 | 2.92  | 1.78 | 0.75 | 0.45 | 2.21 | 0.001    | 0.0113   | USP6NL         | USP6 N-terminal like                                                                |
| 16706499 | 7.49  | 6.35 | 0.53 | 0.4  | 2.21 | 0.0002   | 0.0026   | PPIF           | peptidylprolyl isomerase F                                                          |
| 17052737 | 3.24  | 2.1  | 0.85 | 0.84 | 2.2  | 0.0048   | 0.0394   | PIP            | prolactin-induced protein                                                           |
| 17021116 | 3.12  | 1.98 | 0.77 | 0.39 | 2.2  | 0.0028   | 0.0262   | LOC102724168   | uncharacterized LOC102724168                                                        |
| 16782548 | 5.28  | 4.14 | 0.43 | 0.65 | 2.2  | 2.43E-05 | 0.0006   | PCK2           | phosphoenolpyruvate carboxykinase 2 (mitochondrial)                                 |
| 16910618 | 6.87  | 5.73 | 0.32 | 0.33 | 2.2  | 3.86E-06 | 0.0002   | RBCK1          | RanBP-type and C3HC4-type zinc finger containing 1                                  |
| 16828577 | 6.03  | 4.9  | 0.53 | 0.73 | 2.2  | 0.0037   | 0.0322   | MAF            | v-maf avian musculoaponeurotic fibrosarcoma oncogene homolog                        |
| 16961598 | 2.35  | 1.21 | 0.71 | 0.27 | 2.2  | 7.80E-05 | 0.0016   | PLD1           | phospholipase D1, phosphatidylcholine-specific                                      |
| 17021217 | 9.6   | 8.47 | 0.49 | 0.24 | 2.19 | 1.97E-05 | 0.0005   | ME1            | malic enzyme 1, NADP(+)-dependent, cytosolic                                        |
| 17102639 | 2.51  | 1.37 | 0.61 | 0.36 | 2.19 | 0.0003   | 0.0047   |                |                                                                                     |
| 16873049 | 6.14  | 5.01 | 0.59 | 0.42 | 2.19 | 0.0002   | 0.0036   | CADM4          | cell adhesion molecule 4                                                            |
| 16678143 | 4.17  | 3.04 | 0.86 | 0.48 | 2.19 | 0.0056   | 0.0441   |                |                                                                                     |
| 17013014 | 4.55  | 3.42 | 0.6  | 0.65 | 2.19 | 0.0005   | 0.0064   | FLJ46906       | uncharacterized LOC441172                                                           |
| 16851078 | 5.33  | 4.2  | 0.78 | 0.57 | 2.19 | 0.0054   | 0.0434   | LOC105371997   | uncharacterized LOC105371997                                                        |
| 17078626 | 5.43  | 4.3  | 0.54 | 0.61 | 2.19 | 0.0011   | 0.0119   | SLC10A5        | solute carrier family 10, member 5                                                  |
| 16713652 | 1.9   | 0.77 | 0.38 | 0.27 | 2.19 | 1.70E-06 | 8.62E-05 |                |                                                                                     |
| 16714237 | 1.9   | 0.77 | 0.38 | 0.27 | 2.19 | 1.70E-06 | 8.62E-05 |                |                                                                                     |
| 16998293 | 4.62  | 3.5  | 0.33 | 0.37 | 2.18 | 2.31E-06 | 0.0001   | GLRX           | glutaredoxin                                                                        |
| 16838746 | 2.27  | 1.14 | 0.53 | 0.18 | 2.18 | 0.0001   | 0.0025   | PP13           | vegetative cell wall protein gp1                                                    |
| 16911804 | 2.1   | 0.97 | 0.66 | 0.19 | 2.18 | 7.75E-05 | 0.0015   | SLC24A3        | solute carrier family 24 (sodium/potassium/calcium exchanger), member 3             |
| 17123310 | 5.11  | 3.98 | 0.81 | 0.39 | 2.18 | 0.0025   | 0.0235   |                |                                                                                     |
| 16917004 | 9.23  | 8.1  | 0.16 | 0.21 | 2.18 | 1.82E-09 | 8.76E-07 | GPCPD1         | glycerophosphocholine phosphodiesterase 1                                           |
| 17077135 | 7.96  | 6.83 | 0.29 | 0.1  | 2.18 | 8.17E-09 | 2.33E-06 | RB1CC1         | RB1-inducible coiled-coil 1                                                         |
| 16703036 | 5.53  | 4.41 | 0.97 | 0.51 | 2.18 | 0.0047   | 0.0387   | PLXDC2         | plexin domain containing 2                                                          |
| 16874978 | 4.19  | 3.07 | 0.23 | 0.35 | 2.18 | 8.82E-08 | 1.09E-05 | ZNF350         | zinc finger protein 350                                                             |
| 17012281 | 6.26  | 5.14 | 0.22 | 0.28 | 2.18 | 1.36E-08 | 3.27E-06 | TPD52L1        | tumor protein D52-like 1                                                            |
| 16991663 | 4.23  | 3.11 | 0.62 | 0.57 | 2.17 | 0.0003   | 0.0043   | LOC105377682   | uncharacterized LOC105377682                                                        |
| 16962853 | 3.29  | 2.17 | 0.69 | 0.51 | 2.17 | 0.0008   | 0.0099   | LOC105374285   | uncharacterized LOC105374285                                                        |
| 16727074 | 5.75  | 4.63 | 0.39 | 0.82 | 2.17 | 0.0022   | 0.0217   | OVOL1          | ovo-like zinc finger 1                                                              |
| 16997279 | 3.48  | 2.36 | 0.46 | 0.38 | 2.17 | 1.40E-05 | 0.0004   | LINC01336      | long intergenic non-protein coding RNA 1336                                         |
| 17020823 | 6.5   | 5.38 | 0.28 | 0.2  | 2.17 | 1.29E-07 | 1.43E-05 | SLC17A5        | solute carrier family 17 (acidic sugar transporter), member 5                       |
| 17087107 | 5.84  | 4.72 | 0.38 | 0.54 | 2.17 | 2.25E-06 | 0.0001   | MIR23B; C9orf3 | microRNA 23b; chromosome 9 open reading frame 3                                     |
| 16890207 | 5.7   | 4.59 | 0.47 | 0.65 | 2.17 | 0.0016   | 0.0163   | MAP2           | microtubule associated protein 2                                                    |
| 17050120 | 2.09  | 0.98 | 0.64 | 0.53 | 2.17 | 0.0015   | 0.0159   | LOC105375440   | uncharacterized LOC105375440                                                        |
| 16929615 | 6.19  | 5.07 | 0.33 | 0.41 | 2.16 | 1.83E-06 | 9.07E-05 | APOL6          | apolipoprotein L, 6                                                                 |
| 16718622 | 7.61  | 6.49 | 0.23 | 0.6  | 2.16 | 1.25E-05 | 0.0004   | ABLIM1         | actin binding LIM protein 1                                                         |
| 17099463 | 4.69  | 3.57 | 0.82 | 0.28 | 2.16 | 0.0004   | 0.0051   | ABO            | ABO blood group (transferase A, alpha 1-3-N-acetylgalactosaminyltransferase; transf |
| 16832880 | 4.41  | 3.29 | 0.49 | 0.36 | 2.16 | 2.12E-05 | 0.0006   | ADAP2          | ArfGAP with dual PH domains 2                                                       |
| 16844137 | 6.73  | 5.62 | 0.19 | 0.32 | 2.16 | 1.42E-07 | 1.53E-05 | FBXL20         | F-box and leucine-rich repeat protein 20                                            |
| 16841660 | 6.47  | 5.36 | 0.28 | 0.77 | 2.16 | 0.0011   | 0.0121   |                |                                                                                     |
| 16674292 | 7.43  | 6.32 | 0.61 | 0.21 | 2.16 | 0.0005   | 0.0068   | RALGPS2        | Ral GEF with PH domain and SH3 binding motif 2                                      |
| 16860183 | 3.02  | 1.91 | 0.65 | 0.55 | 2.15 | 0.0007   | 0.0083   | ZNF493         | zinc finger protein 493                                                             |
| 16712421 | 1.54  | 0.43 | 0.68 | 0.19 | 2.15 | 0.0002   | 0.0031   | C10orf113      | chromosome 10 open reading frame 113                                                |

|          |      |      |      |      |      |          |          |                 |                                                                                    |
|----------|------|------|------|------|------|----------|----------|-----------------|------------------------------------------------------------------------------------|
| 17011450 | 3.19 | 2.09 | 0.71 | 0.47 | 2.15 | 0.0005   | 0.0072   | FOXO3           | forkhead box O3                                                                    |
| 17024356 | 3.75 | 2.64 | 0.52 | 0.42 | 2.15 | 5.57E-05 | 0.0012   |                 |                                                                                    |
| 17086193 | 9.89 | 8.78 | 0.39 | 0.36 | 2.15 | 3.12E-06 | 0.0001   | PSAT1           | phosphoserine aminotransferase 1                                                   |
| 16722684 | 7.34 | 6.24 | 0.31 | 0.2  | 2.15 | 2.76E-07 | 2.42E-05 | ZDHHC13         | zinc finger, DHHC-type containing 13                                               |
| 16904024 | 5.74 | 4.64 | 0.19 | 0.33 | 2.14 | 1.03E-06 | 6.03E-05 | WDSUB1          | WD repeat, sterile alpha motif and U-box domain containing 1                       |
| 17123414 | 3.39 | 2.29 | 0.78 | 0.47 | 2.14 | 0.0008   | 0.0098   |                 |                                                                                    |
| 16689400 | 1.65 | 0.55 | 0.89 | 0.22 | 2.14 | 0.0018   | 0.0185   | GBP5            | guanylate binding protein 5                                                        |
| 16742422 | 2.22 | 1.12 | 0.96 | 0.31 | 2.14 | 0.0033   | 0.0291   |                 |                                                                                    |
| 17074815 | 4.96 | 3.87 | 0.56 | 0.18 | 2.14 | 7.84E-06 | 0.0003   | LONRF1          | LON peptidase N-terminal domain and ring finger 1                                  |
| 16976502 | 6.15 | 5.05 | 0.42 | 0.36 | 2.14 | 9.01E-06 | 0.0003   | YTHDC1          | YTH domain containing 1                                                            |
| 16873117 | 3.32 | 2.23 | 0.54 | 0.21 | 2.14 | 3.63E-05 | 0.0009   | ZNF404          | zinc finger protein 404                                                            |
| 16997537 | 1.63 | 0.53 | 0.93 | 0.17 | 2.14 | 0.0005   | 0.0061   | DMGDH           | dimethylglycine dehydrogenase                                                      |
| 16819892 | 9.58 | 8.48 | 0.21 | 0.53 | 2.14 | 2.81E-06 | 0.0001   | CES2            | carboxylesterase 2                                                                 |
| 16775434 | 7.72 | 6.63 | 0.33 | 0.32 | 2.13 | 1.24E-06 | 6.89E-05 | LMO7            | LIM domain 7                                                                       |
| 16959441 | 5.36 | 4.27 | 0.39 | 0.22 | 2.13 | 5.69E-07 | 3.87E-05 | AMOTL2          | angiominin like 2                                                                  |
| 17059771 | 8.55 | 7.46 | 0.56 | 0.36 | 2.13 | 0.0001   | 0.0025   | SAMD9           | sterile alpha motif domain containing 9                                            |
| 17061106 | 4.94 | 3.85 | 0.68 | 0.42 | 2.13 | 0.0004   | 0.0058   | RASA4B; RASA4   | RAS p21 protein activator 4B; RAS p21 protein activator 4                          |
| 16823666 | 9.25 | 8.16 | 0.34 | 0.39 | 2.13 | 8.78E-07 | 5.40E-05 | PPL             | periplakin                                                                         |
| 16949911 | 4.02 | 2.93 | 0.44 | 0.3  | 2.13 | 4.29E-05 | 0.001    | LINC00969       | long intergenic non-protein coding RNA 969                                         |
| 17055006 | 4.19 | 3.1  | 0.39 | 0.46 | 2.13 | 9.94E-05 | 0.0019   | FAM220A         | family with sequence similarity 220, member A                                      |
| 16976615 | 4.46 | 3.37 | 0.54 | 0.82 | 2.13 | 0.0003   | 0.0039   | SULT1E1; SULT1D | sulfotransferase family 1E member 1; sulfotransferase family 1D member 1, pseudoge |
| 16819099 | 7.88 | 6.8  | 0.41 | 0.51 | 2.13 | 0.0001   | 0.0021   | CAPNS2          | calpain, small subunit 2                                                           |
| 17095587 | 2.56 | 1.47 | 0.37 | 0.13 | 2.13 | 2.24E-07 | 2.08E-05 | SEMA4D          | sema domain, immunoglobulin domain (Ig), transmembrane domain (TM) and short cy    |
| 17064600 | 4.05 | 2.96 | 0.51 | 0.27 | 2.13 | 1.88E-05 | 0.0005   |                 |                                                                                    |
| 16779006 | 3.82 | 2.73 | 0.48 | 0.59 | 2.12 | 0.0003   | 0.0045   | LPAR6           | lysophosphatidic acid receptor 6                                                   |
| 17014714 | 8.94 | 7.86 | 0.34 | 0.14 | 2.12 | 1.49E-07 | 1.57E-05 | MLLT4           | myeloid/lymphoid or mixed-lineage leukemia; translocated to, 4                     |
| 17000854 | 7.55 | 6.47 | 0.38 | 0.19 | 2.12 | 4.48E-06 | 0.0002   | TA7F            | TA7F RNA polymerase II, TATA box binding protein (TBP)-associated factor, 55kDa    |
| 16852858 | 8.83 | 7.74 | 0.5  | 0.33 | 2.12 | 0.0001   | 0.0025   | SERPINB7        | serpin peptidase inhibitor, clade B (ovalbumin), member 7                          |
| 16990327 | 1.98 | 0.9  | 0.41 | 0.3  | 2.11 | 3.82E-05 | 0.0009   | PCDHB18P        | protocadherin beta 18 pseudogene                                                   |
| 16829894 | 7.08 | 6    | 0.32 | 0.2  | 2.11 | 1.44E-07 | 1.54E-05 | PLD2            | phospholipase D2                                                                   |
| 16797985 | 1.88 | 0.81 | 1    | 0.31 | 2.11 | 0.0031   | 0.0281   | PWRN1           | Prader-Willi region non-protein coding RNA 1                                       |
| 17074004 | 3.43 | 2.36 | 0.22 | 0.34 | 2.11 | 9.21E-07 | 5.59E-05 | LOC101927506    | uncharacterized LOC101927506                                                       |
| 16672052 | 2.41 | 1.33 | 0.84 | 0.24 | 2.11 | 0.0015   | 0.0154   | RHBG            | Rh family, B glycoprotein (gene/pseudogene)                                        |
| 17061153 | 3.1  | 2.03 | 0.48 | 0.22 | 2.1  | 2.92E-06 | 0.0001   |                 |                                                                                    |
| 16698466 | 6.86 | 5.78 | 0.42 | 0.2  | 2.1  | 2.49E-06 | 0.0001   | NUAK2           | NUAK family, SNF1-like kinase, 2                                                   |
| 16978624 | 1.86 | 0.78 | 0.44 | 0.41 | 2.1  | 0.0002   | 0.0034   |                 |                                                                                    |
| 16934045 | 3.18 | 2.11 | 0.43 | 0.28 | 2.1  | 6.15E-06 | 0.0002   | PIK3IP1         | phosphoinositide-3-kinase interacting protein 1                                    |
| 16702524 | 6.93 | 5.86 | 0.65 | 0.74 | 2.1  | 0.0023   | 0.0022   | CAMK1D          | calcium/calmodulin-dependent protein kinase 1D                                     |
| 16886818 | 8.6  | 7.53 | 0.31 | 0.51 | 2.1  | 1.57E-05 | 0.0005   | TANC1           | tetratricopeptide repeat, ankyrin repeat and coiled-coil containing 1              |
| 16675924 | 5.29 | 4.22 | 0.53 | 0.7  | 2.1  | 0.0003   | 0.0044   | ELF3            | E74-like factor 3 (ets domain transcription factor, epithelial-specific)           |
| 16849635 | 5.9  | 4.83 | 0.43 | 0.47 | 2.09 | 3.70E-05 | 0.0009   | CBX4            | chromobox homolog 4                                                                |
| 16850009 | 5.39 | 4.32 | 0.22 | 0.47 | 2.09 | 5.03E-06 | 0.0002   | SIRT7           | sirtuin 7                                                                          |
| 16679567 | 2.31 | 1.25 | 0.51 | 0.5  | 2.09 | 0.0002   | 0.0036   |                 |                                                                                    |
| 16898326 | 9.02 | 7.96 | 0.15 | 0.42 | 2.09 | 2.32E-07 | 2.13E-05 | PELI1           | pellino E3 ubiquitin protein ligase 1                                              |
| 17075922 | 6.4  | 5.34 | 0.49 | 0.35 | 2.09 | 2.88E-05 | 0.0007   | KIF13B          | kinesin family member 13B                                                          |
| 17004879 | 5.86 | 4.8  | 0.14 | 0.13 | 2.09 | 8.74E-11 | 1.83E-07 | HIVEP1          | human immunodeficiency virus type I enhancer binding protein 1                     |
| 16847863 | 5.22 | 4.16 | 0.55 | 0.6  | 2.08 | 0.0007   | 0.0087   | PLEKHM1P        | pleckstrin homology domain containing, family M (with RUN domain) member 1 pseud   |
| 16816010 | 3.27 | 2.21 | 0.52 | 0.27 | 2.08 | 0.0004   | 0.0061   | MIR193BHG       | MIR193B host gene                                                                  |
| 16820822 | 1.77 | 0.72 | 0.86 | 0.21 | 2.08 | 0.0005   | 0.0065   | IL34            | interleukin 34                                                                     |
| 16875949 | 2.71 | 1.65 | 0.52 | 0.51 | 2.08 | 0.0004   | 0.0056   |                 |                                                                                    |
| 17095461 | 8.42 | 7.36 | 0.29 | 0.14 | 2.08 | 2.74E-07 | 2.41E-05 | ZCCHC6          | zinc finger, CCHC domain containing 6                                              |
| 16775491 | 2.31 | 1.26 | 0.63 | 0.32 | 2.08 | 0.0002   | 0.003    | LMO7DN          | LMO7 downstream neighbor                                                           |
| 17015166 | 6.67 | 5.61 | 0.39 | 0.39 | 2.08 | 1.03E-05 | 0.0003   | SLC22A23        | solute carrier family 22, member 23                                                |
| 16809219 | 2.26 | 1.21 | 0.52 | 0.3  | 2.08 | 0.0002   | 0.0027   | TNFAIP8L3       | tumor necrosis factor, alpha-induced protein 8-like 3                              |
| 16802064 | 2.95 | 1.9  | 0.54 | 0.2  | 2.08 | 4.03E-06 | 0.0002   | ANKDD1A         | ankyrin repeat and death domain containing 1A                                      |
| 17031422 | 6.38 | 5.33 | 0.76 | 0.38 | 2.07 | 0.0007   | 0.0089   |                 |                                                                                    |
| 17033878 | 6.38 | 5.33 | 0.76 | 0.38 | 2.07 | 0.0007   | 0.0089   |                 |                                                                                    |
| 17038920 | 6.38 | 5.33 | 0.76 | 0.38 | 2.07 | 0.0007   | 0.0089   |                 |                                                                                    |
| 16819539 | 9.19 | 8.14 | 0.44 | 0.24 | 2.07 | 6.07E-06 | 0.0002   | ADGRG1          | adhesion G protein-coupled receptor G1                                             |
| 17088116 | 2.01 | 0.96 | 0.68 | 0.48 | 2.07 | 0.0001   | 0.0021   | MIR4668         | microRNA 4668                                                                      |
| 16784787 | 7.62 | 6.58 | 0.32 | 0.15 | 2.07 | 2.58E-07 | 2.30E-05 | DAAM1           | dishevelled associated activator of morphogenesis 1                                |
| 17124530 | 5.43 | 4.38 | 0.2  | 0.25 | 2.07 | 2.25E-08 | 4.36E-06 |                 |                                                                                    |
| 17121944 | 4.97 | 3.93 | 0.54 | 0.55 | 2.07 | 0.002    | 0.0195   |                 |                                                                                    |
| 17119722 | 4.24 | 3.19 | 0.44 | 0.66 | 2.07 | 0.0001   | 0.0021   |                 |                                                                                    |
| 16795612 | 1.93 | 0.88 | 0.71 | 0.2  | 2.06 | 0.0008   | 0.0096   | EML5            | echinoderm microtubule associated protein like 5                                   |
| 17078061 | 6.81 | 5.76 | 0.37 | 0.34 | 2.06 | 8.70E-06 | 0.0003   | NCOA2           | nuclear receptor coactivator 2                                                     |
| 17060061 | 6.71 | 5.67 | 0.48 | 0.44 | 2.06 | 5.53E-05 | 0.0012   | ASNS            | asparagine synthetase (glutamine-hydrolyzing)                                      |
| 16789305 | 3.81 | 2.77 | 0.48 | 0.32 | 2.06 | 0.0002   | 0.0028   | KLC1            | kinesin light chain 1                                                              |
| 16840961 | 3.05 | 2.01 | 0.85 | 0.47 | 2.06 | 0.0017   | 0.0178   | LOC100128288    | uncharacterized LOC100128288                                                       |
| 16765404 | 5.46 | 4.42 | 0.32 | 0.27 | 2.06 | 5.62E-07 | 3.84E-05 | CALCOCO1        | calcium binding and coiled-coil domain 1                                           |
| 17102352 | 2.6  | 1.56 | 0.6  | 0.79 | 2.06 | 0.0049   | 0.0396   | GK              | glycerol kinase                                                                    |
| 16961551 | 6.97 | 5.93 | 0.2  | 0.76 | 2.06 | 6.44E-05 | 0.0013   | PLD1            | phospholipase D1, phosphatidylcholine-specific                                     |
| 17101896 | 6    | 4.96 | 0.28 | 0.18 | 2.06 | 1.20E-07 | 1.35E-05 | CDKL5           | cyclin-dependent kinase-like 5                                                     |
| 16845899 | 4.66 | 3.62 | 0.3  | 0.28 | 2.06 | 1.19E-06 | 6.69E-05 | ARHGAP27        | Rho GTPase activating protein 27                                                   |
| 17121428 | 2.13 | 1.09 | 0.9  | 0.19 | 2.05 | 0.0005   | 0.0062   |                 |                                                                                    |
| 17057134 | 4.84 | 3.8  | 0.56 | 0.31 | 2.05 | 1.53E-05 | 0.0004   | RASA4CP         | RAS p21 protein activator 4C, pseudogene                                           |
| 17061121 | 3.62 | 2.58 | 0.8  | 0.69 | 2.05 | 0.0021   | 0.0206   | RASA4B; RASA4   | RAS p21 protein activator 4B; RAS p21 protein activator 4                          |
| 16969414 | 6.93 | 5.89 | 0.28 | 0.25 | 2.05 | 7.84E-07 | 4.96E-05 | TET2            | tet methylcytosine dioxygenase 2                                                   |
| 16977537 | 6.5  | 5.47 | 0.46 | 0.16 | 2.05 | 6.18E-06 | 0.0002   | HPSE            | heparanase                                                                         |
| 17063681 | 6.19 | 5.16 | 0.26 | 0.3  | 2.05 | 7.33E-07 | 4.72E-05 | KIAA1147        | KIAA1147                                                                           |

|          |      |       |      |      |       |          |          |                 |                                                                                        |
|----------|------|-------|------|------|-------|----------|----------|-----------------|----------------------------------------------------------------------------------------|
| 17070492 | 2.75 | 1.71  | 0.94 | 0.44 | 2.05  | 0.0034   | 0.0299   | ATP6V0D2        | ATPase, H+ transporting, lysosomal 38kDa, V0 subunit d2                                |
| 16829784 | 2.51 | 1.48  | 0.48 | 0.55 | 2.05  | 0.0023   | 0.0222   |                 |                                                                                        |
| 16964749 | 6.74 | 5.71  | 0.25 | 0.26 | 2.05  | 1.34E-07 | 1.46E-05 | KIAA0232        | KIAA0232                                                                               |
| 17123522 | 3.24 | 2.2   | 0.77 | 0.37 | 2.05  | 0.0006   | 0.0076   |                 |                                                                                        |
| 16766940 | 5    | 3.97  | 0.83 | 0.39 | 2.05  | 0.0055   | 0.0434   |                 |                                                                                        |
| 16873104 | 3.71 | 2.68  | 0.66 | 0.44 | 2.05  | 0.0007   | 0.0089   | LYPD5           | LY6/PLAUR domain containing 5                                                          |
| 16775187 | 0.96 | -0.08 | 0.92 | 0.24 | 2.05  | 0.0042   | 0.0356   |                 |                                                                                        |
| 16672489 | 7.69 | 6.66  | 0.56 | 0.35 | 2.04  | 8.29E-05 | 0.0016   | LINC01133       | long intergenic non-protein coding RNA 1133                                            |
| 17116946 | 3.14 | 2.11  | 0.78 | 0.41 | 2.04  | 0.0039   | 0.0336   | MAFIP           | MAFF interacting protein (pseudogene)                                                  |
| 16833965 | 3.72 | 2.7   | 0.33 | 0.51 | 2.04  | 0.0002   | 0.0029   | THRA; NR1D1     | thyroid hormone receptor, alpha; nuclear receptor subfamily 1, group D, member 1       |
| 17061138 | 8.78 | 7.75  | 0.52 | 0.58 | 2.04  | 0.0002   | 0.0034   | UPK3BL; POLR2J2 | uroplakin 3B-like; polymerase (RNA) II (DNA directed) polypeptide J2; polymerase (RN   |
| 16990897 | 4.71 | 3.68  | 0.29 | 0.52 | 2.04  | 0.0001   | 0.0019   | AFAP1L1         | actin filament associated protein 1-like 1                                             |
| 17121346 | 5.6  | 4.57  | 0.37 | 0.48 | 2.04  | 0.0001   | 0.0019   |                 |                                                                                        |
| 17123970 | 2.16 | 1.14  | 0.79 | 0.26 | 2.03  | 0.0022   | 0.0214   |                 |                                                                                        |
| 16696824 | 6.56 | 5.54  | 0.58 | 0.39 | 2.03  | 0.0006   | 0.0072   | ABL2            | ABL proto-oncogene 2, non-receptor tyrosine kinase                                     |
| 17024285 | 6.39 | 5.37  | 0.41 | 0.35 | 2.03  | 5.42E-05 | 0.0012   | CITED2          | Cbp/p300-interacting transactivator, with Glu/Asp rich carboxy-terminal domain, 2      |
| 16657572 | 5    | 3.98  | 0.46 | 0.25 | 2.03  | 2.28E-05 | 0.0006   | PLEKHN1         | pleckstrin homology domain containing, family N member 1                               |
| 16721593 | 5.46 | 4.44  | 0.3  | 0.45 | 2.03  | 9.93E-06 | 0.0003   | PPFIBP2         | PTPRF interacting protein, binding protein 2 (liprin beta 2)                           |
| 17076859 | 2.31 | 1.29  | 0.52 | 0.27 | 2.02  | 4.81E-05 | 0.0011   |                 |                                                                                        |
| 16893697 | 6.34 | 5.32  | 0.37 | 0.39 | 2.02  | 1.46E-05 | 0.0004   | LOC728323       | uncharacterized LOC728323                                                              |
| 16949505 | 2.51 | 1.5   | 0.41 | 0.32 | 2.02  | 0.0003   | 0.0045   | TPRG1           | tumor protein p63 regulated 1                                                          |
| 16936640 | 4.87 | 3.86  | 0.46 | 0.59 | 2.02  | 0.0004   | 0.0061   | LOC105373098    | uncharacterized LOC105373098                                                           |
| 16780917 | 6.01 | 5     | 0.27 | 0.47 | 2.02  | 1.59E-05 | 0.0005   | IRS2            | insulin receptor substrate 2                                                           |
| 16840846 | 7.2  | 6.19  | 0.36 | 0.49 | 2.02  | 0.0005   | 0.0071   | PER1            | period circadian clock 1                                                               |
| 16795908 | 4.93 | 3.92  | 0.32 | 0.47 | 2.02  | 2.64E-05 | 0.0007   | CATSPERB        | catsper channel auxiliary subunit beta                                                 |
| 16990294 | 2.6  | 1.59  | 0.58 | 0.32 | 2.02  | 0.0001   | 0.0025   | PCDHB10         | protocadherin beta 10                                                                  |
| 16966008 | 8.39 | 7.38  | 0.27 | 0.33 | 2.02  | 1.89E-07 | 1.85E-05 | KLF3            | Kruppel-like factor 3 (basic)                                                          |
| 16710020 | 6.19 | 5.18  | 0.27 | 0.3  | 2.01  | 5.05E-07 | 3.60E-05 | TACC2           | transforming, acidic coiled-coil containing protein 2                                  |
| 16911108 | 4.2  | 3.19  | 0.38 | 0.4  | 2.01  | 0.0009   | 0.0107   | SMOX            | spermine oxidase                                                                       |
| 17124532 | 3.8  | 2.79  | 0.46 | 0.27 | 2.01  | 2.89E-06 | 0.0001   |                 |                                                                                        |
| 17045380 | 5.63 | 4.62  | 0.64 | 0.3  | 2.01  | 0.0002   | 0.0026   | LINC00265       | long intergenic non-protein coding RNA 265                                             |
| 17052935 | 5.57 | 4.56  | 0.78 | 0.61 | 2.01  | 0.0064   | 0.0492   | OR2A9P; OR2A20  | olfactory receptor, family 2, subfamily A, member 9 pseudogene; olfactory receptor, fo |
| 17126024 | 7.91 | 6.9   | 0.29 | 0.22 | 2.01  | 6.69E-07 | 4.41E-05 |                 |                                                                                        |
| 16819325 | 7.84 | 6.83  | 0.29 | 0.37 | 2.01  | 1.81E-06 | 9.02E-05 | HERPUD1         | homocysteine-inducible, endoplasmic reticulum stress-inducible, ubiquitin-like domain  |
| 16872796 | 10.4 | 9.4   | 0.27 | 0.56 | 2     | 3.32E-05 | 0.0008   | CXCL17          | chemokine (C-X-C motif) ligand 17                                                      |
| 16710360 | 9.03 | 8.03  | 0.2  | 0.11 | 2     | 1.73E-09 | 8.59E-07 | ZRANB1          | zinc finger, RAN-binding domain containing 1                                           |
| 16880669 | 9.1  | 8.1   | 0.43 | 0.38 | 2     | 9.17E-05 | 0.0018   | LGALS1          | lectin, galactoside-binding-like                                                       |
| 16829664 | 2.41 | 3.41  | 0.24 | 0.38 | -2    | 4.32E-06 | 0.0002   | LOC105371489    | uncharacterized LOC105371489                                                           |
| 17067314 | 4.7  | 5.71  | 0.59 | 0.34 | -2.01 | 0.0007   | 0.0089   | SCARA3          | scavenger receptor class A, member 3                                                   |
| 16686557 | 2.73 | 3.74  | 0.27 | 0.39 | -2.01 | 1.30E-05 | 0.0004   | PIK3R3          | phosphoinositide-3-kinase, regulatory subunit 3 (gamma)                                |
| 17120506 | 7.56 | 8.57  | 0.2  | 0.3  | -2.01 | 1.29E-07 | 1.43E-05 |                 |                                                                                        |
| 17121840 | 3.76 | 4.77  | 0.37 | 0.45 | -2.01 | 0.0002   | 0.0029   |                 |                                                                                        |
| 17061662 | 5.33 | 6.34  | 0.48 | 0.87 | -2.01 | 0.0013   | 0.014    | LAMB1           | laminin, beta 1                                                                        |
| 16829420 | 1.55 | 2.56  | 0.26 | 0.89 | -2.01 | 0.0005   | 0.0062   |                 |                                                                                        |
| 16757347 | 4.55 | 5.56  | 0.37 | 0.36 | -2.01 | 0.0009   | 0.0104   | OAS3; OAS2      | 2'-5'-oligoadenylate synthetase 3; 2'-5'-oligoadenylate synthetase 2                   |
| 16866951 | 5.16 | 6.17  | 0.12 | 0.26 | -2.01 | 2.19E-08 | 4.30E-06 | LMNB2           | lamin B2                                                                               |
| 17059974 | 6.1  | 7.11  | 0.38 | 0.17 | -2.01 | 1.77E-06 | 8.83E-05 | SLC25A13        | solute carrier family 25 (aspartate/glutamate carrier), member 13                      |
| 16987125 | 6.26 | 7.27  | 0.41 | 0.32 | -2.01 | 8.97E-06 | 0.0003   | POLR3G          | polymerase (RNA) III (DNA directed) polypeptide G (32kD)                               |
| 16851486 | 7.34 | 8.35  | 0.63 | 0.3  | -2.02 | 0.0006   | 0.0079   | LAMA3           | laminin, alpha 3                                                                       |
| 16852206 | 3.54 | 4.56  | 0.28 | 0.29 | -2.02 | 1.66E-06 | 8.46E-05 | HAUS1           | HAUS augmin like complex subunit 1                                                     |
| 16849982 | 4.13 | 5.14  | 0.17 | 0.12 | -2.02 | 5.74E-10 | 4.54E-07 | ALYREF          | Aly/REF export factor                                                                  |
| 17120866 | 7.15 | 8.17  | 0.49 | 0.22 | -2.02 | 5.11E-05 | 0.0011   |                 |                                                                                        |
| 17073078 | 1.64 | 2.66  | 0.3  | 0.35 | -2.02 | 1.28E-05 | 0.0004   | DENND3          | DENN/MADD domain containing 3                                                          |
| 17080747 | 1.86 | 2.88  | 0.48 | 0.65 | -2.02 | 0.0027   | 0.025    |                 |                                                                                        |
| 16981506 | 4.99 | 6.01  | 0.33 | 0.43 | -2.02 | 4.50E-05 | 0.001    | HMGB2           | high mobility group box 2                                                              |
| 16694617 | 3.7  | 4.72  | 0.7  | 0.5  | -2.02 | 0.0008   | 0.0097   | IQGAP3          | IQ motif containing GTPase activating protein 3                                        |
| 16858970 | 4.83 | 5.85  | 0.74 | 0.52 | -2.02 | 0.001    | 0.0116   | ADGRE5          | adhesion G protein-coupled receptor E5                                                 |
| 16845158 | 6.36 | 7.38  | 0.33 | 0.21 | -2.02 | 3.19E-07 | 2.65E-05 | PTRF            | polymerase I and transcript release factor                                             |
| 17070221 | 2.21 | 3.23  | 0.48 | 0.7  | -2.02 | 0.0002   | 0.0034   | PKIA            | protein kinase (cAMP-dependent, catalytic) inhibitor alpha                             |
| 17021845 | 4.83 | 5.85  | 0.18 | 0.29 | -2.02 | 1.04E-07 | 1.22E-05 | MMS22L          | MMS22-like, DNA repair protein                                                         |
| 17089898 | 6.7  | 7.72  | 0.24 | 0.15 | -2.02 | 1.54E-08 | 3.49E-06 | NUP188          | nucleoporin 188kDa                                                                     |
| 16705934 | 4.49 | 5.51  | 0.46 | 0.33 | -2.02 | 7.52E-06 | 0.0003   | CHST3           | carbohydrate (chondroitin 6) sulfotransferase 3                                        |
| 1675928  | 3.99 | 5.01  | 0.39 | 0.25 | -2.02 | 1.03E-06 | 6.04E-05 | PARPBP          | PARP1 binding protein                                                                  |
| 17048083 | 2.21 | 3.23  | 0.37 | 0.42 | -2.03 | 3.41E-05 | 0.0008   | STEAP2          | STEAP family member 2, metalloproteinase                                               |
| 16935517 | 3.18 | 4.2   | 0.26 | 0.31 | -2.03 | 1.24E-06 | 6.89E-05 | CENPM           | centromere protein M                                                                   |
| 16976211 | 7.31 | 8.33  | 0.34 | 0.24 | -2.03 | 2.74E-06 | 0.0001   | IGFBP7          | insulin like growth factor binding protein 7                                           |
| 16938933 | 1.94 | 2.96  | 0.53 | 0.81 | -2.03 | 0.0058   | 0.0457   |                 |                                                                                        |
| 16717106 | 4.72 | 5.74  | 0.42 | 0.32 | -2.03 | 0.0001   | 0.0024   | RRP12           | ribosomal RNA processing 12 homolog                                                    |
| 17076063 | 7.39 | 8.41  | 0.39 | 0.24 | -2.03 | 1.41E-05 | 0.0004   | GSR             | glutathione reductase                                                                  |
| 16835483 | 2.53 | 3.55  | 0.29 | 0.25 | -2.03 | 1.65E-06 | 8.40E-05 | ATP5G1          | ATP synthase, H+ transporting, mitochondrial Fo complex subunit C1 (subunit 9)         |
| 16719802 | 3.16 | 4.18  | 0.38 | 0.63 | -2.03 | 0.0005   | 0.0063   | ADAM8           | ADAM metalloproteinase domain 8                                                        |
| 16733530 | 1.17 | 2.19  | 0.37 | 0.75 | -2.03 | 0.0035   | 0.0311   | LOC105369575    | uncharacterized LOC105369575                                                           |
| 17016043 | 5.37 | 6.39  | 0.34 | 0.28 | -2.03 | 5.16E-06 | 0.0002   | MBOAT1          | membrane bound O-acyltransferase domain containing 1                                   |
| 17024079 | 5.78 | 6.8   | 0.33 | 0.27 | -2.04 | 1.46E-05 | 0.0004   | MAP3K5          | mitogen-activated protein kinase kinase 5                                              |
| 17092615 | 5.17 | 6.19  | 0.28 | 0.18 | -2.04 | 6.34E-08 | 8.90E-06 | PSIP1           | PC4 and SFRS1 interacting protein 1                                                    |
| 16657821 | 4.52 | 5.55  | 0.34 | 0.3  | -2.04 | 2.28E-06 | 0.0001   | ATAD3A; ATAD3B  | ATPase family, AAA domain containing 3A; ATPase family, AAA domain containing 3B       |
| 17015240 | 2.28 | 3.31  | 0.43 | 0.36 | -2.04 | 9.59E-06 | 0.0003   | ECI2            | enoyl-CoA delta isomerase 2                                                            |
| 16733104 | 5.63 | 6.66  | 0.22 | 0.25 | -2.04 | 2.47E-08 | 4.66E-06 | CHEK1           | checkpoint kinase 1                                                                    |
| 16678496 | 3.99 | 5.02  | 0.69 | 0.31 | -2.04 | 0.0002   | 0.0031   | HIST3H2BB       | histone cluster 3, H2bb                                                                |
| 16885432 | 7.01 | 8.04  | 0.46 | 0.11 | -2.04 | 1.64E-05 | 0.0005   | UGGT1           | UDP-glucose glycoprotein glucosyltransferase 1                                         |



|          |      |      |      |      |       |          |          |                  |                                                                                      |
|----------|------|------|------|------|-------|----------|----------|------------------|--------------------------------------------------------------------------------------|
| 16691972 | 1.78 | 2.81 | 0.34 | 0.3  | -2.04 | 3.82E-05 | 0.0009   | PDE4DIP          | phosphodiesterase 4D interacting protein                                             |
| 16927198 | 1.32 | 2.35 | 0.19 | 0.12 | -2.04 | 1.63E-09 | 8.59E-07 | RANBP1           | RAN binding protein 1                                                                |
| 17009862 | 4.07 | 5.1  | 0.16 | 0.15 | -2.04 | 3.21E-10 | 3.46E-07 | PRIM2            | primase, DNA, polypeptide 2 (58kDa)                                                  |
| 16674767 | 7.74 | 8.77 | 0.09 | 0.06 | -2.05 | 1.27E-12 | 1.13E-08 | DHX9             | DEAH (Asp-Glu-Ala-His) box helicase 9                                                |
| 16765884 | 3.55 | 4.58 | 0.49 | 0.42 | -2.05 | 0.0021   | 0.0206   |                  |                                                                                      |
| 17062321 | 2.14 | 3.18 | 0.58 | 0.44 | -2.05 | 0.0004   | 0.0054   | CADPS2           | Ca <sup>++</sup> -dependent secretion activator 2                                    |
| 17068782 | 7.3  | 8.33 | 0.19 | 0.19 | -2.05 | 2.69E-09 | 1.13E-06 | MCM4             | minichromosome maintenance complex component 4                                       |
| 16985162 | 5.5  | 6.53 | 0.19 | 0.12 | -2.05 | 9.33E-10 | 6.24E-07 | IPO11; KIF2A     | importin 11; kinesin heavy chain member 2A                                           |
| 16909413 | 3.65 | 4.69 | 0.51 | 0.47 | -2.05 | 3.47E-05 | 0.0008   | SP110            | SP110 nuclear body protein                                                           |
| 16753800 | 5.71 | 6.75 | 0.11 | 0.1  | -2.05 | 1.96E-11 | 7.26E-08 | NUP107           | nucleoporin 107kDa                                                                   |
| 16885978 | 6.12 | 7.16 | 0.25 | 0.2  | -2.05 | 1.15E-07 | 1.32E-05 | R3HDM1           | R3H domain containing 1                                                              |
| 16699795 | 4.24 | 5.28 | 0.18 | 0.17 | -2.06 | 1.49E-09 | 8.57E-07 | NVL              | nuclear VCP-like                                                                     |
| 17121916 | 2.79 | 3.83 | 0.43 | 0.45 | -2.06 | 0.0002   | 0.0028   |                  |                                                                                      |
| 16691969 | 4.37 | 5.41 | 0.5  | 0.37 | -2.06 | 0.0003   | 0.0045   | LOC105371220     | uncharacterized LOC105371220                                                         |
| 16757687 | 5.66 | 6.7  | 0.24 | 0.15 | -2.06 | 2.91E-09 | 1.17E-06 | RFC5             | replication factor C subunit 5                                                       |
| 17125762 | 1.49 | 2.53 | 0.37 | 0.36 | -2.06 | 7.51E-06 | 0.0003   |                  |                                                                                      |
| 17038792 | 4.16 | 5.2  | 0.5  | 0.35 | -2.06 | 7.16E-06 | 0.0003   |                  |                                                                                      |
| 16839131 | 5.61 | 6.65 | 0.35 | 0.17 | -2.06 | 3.56E-07 | 2.87E-05 | TBCD             | tubulin folding cofactor D                                                           |
| 16907960 | 4.97 | 6.02 | 0.41 | 0.14 | -2.06 | 1.46E-06 | 7.70E-05 | BARD1            | BRCA1 associated RING domain 1                                                       |
| 17106183 | 4.66 | 5.7  | 0.4  | 0.27 | -2.06 | 5.44E-07 | 3.77E-05 | TMEM164          | transmembrane protein 164                                                            |
| 16772144 | 4.43 | 5.48 | 0.32 | 0.1  | -2.06 | 1.33E-07 | 1.46E-05 | SCARB1           | scavenger receptor class B, member 1                                                 |
| 17121912 | 2.54 | 3.59 | 0.5  | 0.63 | -2.07 | 0.0058   | 0.0453   |                  |                                                                                      |
| 16702254 | 4.69 | 5.73 | 0.38 | 0.36 | -2.07 | 4.64E-06 | 0.0002   | LOC102723721     | uncharacterized LOC102723721                                                         |
| 17034090 | 4.23 | 5.28 | 0.24 | 0.1  | -2.07 | 1.66E-09 | 8.59E-07 |                  |                                                                                      |
| 16999379 | 5.32 | 6.37 | 0.47 | 0.38 | -2.07 | 0.0001   | 0.0024   | ALDH7A1          | aldehyde dehydrogenase 7 family, member A1                                           |
| 16867432 | 4.57 | 5.63 | 0.61 | 0.32 | -2.07 | 0.0002   | 0.0027   | PTPRS            | protein tyrosine phosphatase, receptor type, S                                       |
| 16904193 | 6.92 | 7.98 | 0.61 | 0.5  | -2.07 | 0.0002   | 0.0035   | ITGB6            | integrin beta 6                                                                      |
| 16678579 | 6.36 | 7.41 | 0.37 | 0.18 | -2.08 | 4.12E-07 | 3.16E-05 | GALNT2           | polypeptide N-acetylgalactosaminyltransferase 2                                      |
| 16933062 | 0.97 | 2.03 | 0.25 | 0.55 | -2.08 | 9.16E-05 | 0.0018   | DERL3            | derlin 3                                                                             |
| 16725806 | 5.43 | 6.49 | 0.31 | 0.32 | -2.08 | 3.80E-06 | 0.0002   | INCENP           | inner centromere protein                                                             |
| 17083742 | 2.79 | 3.85 | 0.32 | 0.25 | -2.08 | 1.92E-07 | 1.86E-05 | CNTLN            | centlein, centrosomal protein                                                        |
| 16690843 | 5.85 | 6.9  | 0.31 | 0.11 | -2.08 | 1.01E-07 | 1.20E-05 | WDR77            | WD repeat domain 77                                                                  |
| 16902945 | 3.29 | 4.35 | 0.55 | 0.17 | -2.08 | 9.91E-06 | 0.0003   | NCKAP5           | NCK-associated protein 5                                                             |
| 16970563 | 5.4  | 6.46 | 0.42 | 0.23 | -2.08 | 3.33E-06 | 0.0001   | PLK4             | polo-like kinase 4                                                                   |
| 16677425 | 6.19 | 7.25 | 0.53 | 0.8  | -2.09 | 0.0031   | 0.0284   | CENPF            | centromere protein F                                                                 |
| 16901830 | 5.77 | 6.83 | 0.37 | 0.28 | -2.09 | 5.18E-06 | 0.0002   | ANAPC1           | anaphase promoting complex subunit 1                                                 |
| 16819678 | 4.55 | 5.61 | 0.36 | 0.23 | -2.09 | 1.36E-06 | 7.29E-05 | GIN53            | GIN5 complex subunit 3 (Psf3 homolog)                                                |
| 16776160 | 1.27 | 2.33 | 0.29 | 0.71 | -2.09 | 0.0001   | 0.0021   | ITGBL1           | integrin beta like 1                                                                 |
| 16830235 | 3.1  | 4.16 | 0.57 | 0.6  | -2.09 | 0.0011   | 0.0123   | ALOX12P2         | arachidonate 12-lipoxygenase pseudogene 2                                            |
| 17005871 | 1.53 | 2.6  | 0.3  | 0.57 | -2.09 | 0.0007   | 0.0083   | HIST1H2BN        | histone cluster 1, H2bn                                                              |
| 16799426 | 5.26 | 6.33 | 0.19 | 0.41 | -2.09 | 1.93E-06 | 9.46E-05 | PAK6; BUB1B      | p21 protein (Cdc42/Rac)-activated kinase 6; BUB1 mitotic checkpoint serine/threonine |
| 17113525 | 0.91 | 1.97 | 0.19 | 0.23 | -2.09 | 1.87E-08 | 3.88E-06 | KLHL13           | kelch-like family member 13                                                          |
| 16791086 | 4.46 | 5.52 | 0.29 | 0.24 | -2.09 | 1.43E-07 | 1.53E-05 | IPO4             | importin 4                                                                           |
| 16823229 | 1.52 | 2.58 | 0.35 | 0.39 | -2.09 | 1.62E-05 | 0.0005   | PKMYT1           | protein kinase, membrane associated tyrosine/threonine 1                             |
| 16777896 | 7.47 | 8.53 | 0.18 | 0.24 | -2.09 | 7.25E-09 | 2.13E-06 | HSPH1            | heat shock 105kDa/110kDa protein 1                                                   |
| 16735873 | 4.38 | 5.45 | 0.25 | 0.27 | -2.1  | 1.54E-06 | 8.00E-05 | GALNT18          | polypeptide N-acetylgalactosaminyltransferase 18                                     |
| 16908948 | 8.11 | 9.18 | 0.28 | 0.14 | -2.1  | 5.18E-09 | 1.66E-06 | FARSB            | phenylalanyl-tRNA synthetase beta subunit                                            |
| 17085190 | 2.36 | 3.44 | 0.6  | 0.58 | -2.1  | 0.0052   | 0.042    |                  |                                                                                      |
| 17085457 | 2.36 | 3.44 | 0.6  | 0.58 | -2.1  | 0.0052   | 0.042    |                  |                                                                                      |
| 17094376 | 2.36 | 3.44 | 0.6  | 0.58 | -2.1  | 0.0052   | 0.042    |                  |                                                                                      |
| 16977052 | 0.71 | 1.78 | 0.32 | 0.72 | -2.1  | 0.0023   | 0.0224   | CXCL10           | chemokine (C-X-C motif) ligand 10                                                    |
| 16811073 | 4.26 | 5.33 | 0.33 | 0.32 | -2.1  | 3.30E-07 | 2.72E-05 | CLN6             | ceroid-lipofuscinosis, neuronal 6, late infantile, variant                           |
| 17016386 | 2.16 | 3.23 | 0.25 | 0.44 | -2.1  | 1.33E-05 | 0.0004   | HIST1H3D; HIST1H | histone cluster 1, H3D; histone cluster 1, H2ad                                      |
| 16687188 | 4.28 | 5.36 | 0.25 | 0.23 | -2.1  | 1.05E-08 | 2.74E-06 | ORC1             | origin recognition complex subunit 1                                                 |
| 16805422 | 3.41 | 4.48 | 0.31 | 0.31 | -2.11 | 2.84E-06 | 0.0001   | NR2F2            | nuclear receptor subfamily 2, group F, member 2                                      |
| 17111998 | 1.59 | 2.66 | 0.26 | 0.28 | -2.11 | 4.30E-07 | 3.26E-05 | ERCC6L           | excision repair cross-complementation group 6-like                                   |
| 16730467 | 2.14 | 3.22 | 0.12 | 0.57 | -2.11 | 0.0001   | 0.0024   | TMEM133          | transmembrane protein 133                                                            |
| 16771067 | 4.38 | 5.46 | 0.46 | 0.43 | -2.11 | 0.0001   | 0.002    | CIT; MIR1178     | citron rho-interacting serine/threonine kinase; microRNA 1178                        |
| 17067696 | 4.77 | 5.85 | 0.23 | 0.69 | -2.11 | 0.0005   | 0.0071   | NRG1             | neuregulin 1                                                                         |
| 16753670 | 2.17 | 3.25 | 0.63 | 0.52 | -2.11 | 0.0025   | 0.0237   | IRAK3            | interleukin 1 receptor associated kinase 3                                           |
| 16899799 | 4.1  | 5.18 | 0.36 | 0.67 | -2.11 | 0.0019   | 0.0194   | POLR1A           | polymerase (RNA) I polypeptide A                                                     |
| 16792381 | 4.69 | 5.77 | 0.11 | 0.33 | -2.11 | 1.51E-07 | 1.59E-05 | MIS18BP1         | MIS18 binding protein 1                                                              |
| 16845349 | 4.34 | 5.42 | 0.19 | 0.16 | -2.12 | 9.27E-10 | 6.24E-07 | BRCA1            | breast cancer 1, early onset                                                         |
| 17123164 | 2.99 | 4.07 | 0.87 | 0.37 | -2.12 | 0.0023   | 0.0221   |                  |                                                                                      |
| 16664218 | 6.19 | 7.27 | 0.53 | 0.45 | -2.12 | 2.16E-05 | 0.0006   | TSPAN1           | tetraspanin 1                                                                        |
| 17093031 | 5.19 | 6.28 | 0.36 | 0.34 | -2.12 | 2.29E-06 | 0.0001   | MOB3B            | MOB kinase activator 3B                                                              |
| 17075553 | 1.01 | 2.1  | 0.54 | 1.33 | -2.12 | 0.0015   | 0.0159   | STC1             | stanniocalcin 1                                                                      |
| 16707221 | 6.67 | 7.76 | 0.32 | 0.37 | -2.12 | 3.16E-07 | 2.63E-05 | KIF20B           | kinesin family member 20B                                                            |
| 16910501 | 3.76 | 4.84 | 0.44 | 0.35 | -2.12 | 8.38E-06 | 0.0003   | DTYMK            | deoxythymidylate kinase                                                              |
| 16862439 | 5.51 | 6.59 | 0.37 | 0.62 | -2.13 | 0.0001   | 0.0022   | AXL              | AXL receptor tyrosine kinase                                                         |
| 16967831 | 4.58 | 5.67 | 0.45 | 0.65 | -2.13 | 0.0034   | 0.0302   | EPGN             | epithelial mitogen                                                                   |
| 16803754 | 5.39 | 6.48 | 0.33 | 0.42 | -2.13 | 1.03E-05 | 0.0003   | CEMP1            | cell migration inducing protein, hyaluronan binding                                  |
| 16832429 | 4.53 | 5.62 | 0.39 | 0.35 | -2.13 | 2.65E-06 | 0.0001   | TMEM97           | transmembrane protein 97                                                             |
| 16929573 | 5.33 | 6.42 | 0.25 | 0.3  | -2.13 | 1.58E-07 | 1.63E-05 | MCM5             | minichromosome maintenance complex component 5                                       |
| 16677071 | 2.95 | 4.04 | 0.46 | 0.56 | -2.13 | 0.0002   | 0.0028   | SERTAD4          | SERTA domain containing 4                                                            |
| 16849576 | 6.34 | 7.43 | 0.53 | 0.35 | -2.13 | 0.0002   | 0.0032   | LGALS3BP         | lectin, galactoside-binding, soluble, 3 binding protein                              |
| 16873239 | 1.71 | 2.8  | 0.47 | 0.62 | -2.13 | 0.0011   | 0.0124   | TRAPPC6A         | trafficking protein particle complex 6A                                              |
| 17125218 | 4.37 | 5.46 | 0.41 | 0.31 | -2.13 | 4.22E-06 | 0.0002   |                  |                                                                                      |
| 17090713 | 2.6  | 3.69 | 0.51 | 0.7  | -2.13 | 0.0026   | 0.0245   | CEL              | carboxyl ester lipase                                                                |
| 16890602 | 4.29 | 5.39 | 0.67 | 0.4  | -2.14 | 0.0002   | 0.003    | PKI55            | DKFZp434H1419                                                                        |

|          |      |       |      |      |       |          |          |                  |                                                                                |
|----------|------|-------|------|------|-------|----------|----------|------------------|--------------------------------------------------------------------------------|
| 17109503 | 4.81 | 5.91  | 0.46 | 0.23 | -2.14 | 2.34E-05 | 0.0006   | PHKA2            | phosphorylase kinase, alpha 2 (liver)                                          |
| 16856910 | 6.23 | 7.33  | 0.27 | 0.16 | -2.14 | 1.23E-08 | 3.10E-06 | NCLN             | nicalin                                                                        |
| 16756212 | 2.98 | 4.07  | 0.48 | 0.64 | -2.14 | 0.0008   | 0.0098   | CHST11           | carbohydrate (chondroitin 4) sulfotransferase 11                               |
| 16768936 | 2.88 | 3.98  | 0.16 | 0.39 | -2.14 | 6.99E-07 | 4.55E-05 | TMPO-AS1         | TMPO antisense RNA 1                                                           |
| 16783836 | 3.46 | 4.55  | 0.3  | 0.27 | -2.14 | 6.58E-07 | 4.36E-05 | FANCM            | Fanconi anemia complementation group M                                         |
| 17087716 | 6.65 | 7.75  | 0.41 | 0.22 | -2.14 | 3.42E-07 | 2.80E-05 | SMC2             | structural maintenance of chromosomes 2                                        |
| 17020044 | 6.36 | 7.46  | 0.41 | 0.4  | -2.14 | 7.33E-06 | 0.0003   | TRAM2            | translocation associated membrane protein 2                                    |
| 16798820 | 0.79 | 1.89  | 0.34 | 0.99 | -2.14 | 0.0008   | 0.0098   |                  |                                                                                |
| 16840766 | 2.33 | 3.43  | 0.45 | 0.27 | -2.14 | 0.0001   | 0.0024   | LOC100128281     | uncharacterized LOC100128281                                                   |
| 17016494 | 9.88 | 10.98 | 0.44 | 0.23 | -2.15 | 8.45E-07 | 5.24E-05 | HIST1H4K; HIST1H | histone cluster 1, H4k; histone cluster 1, H4j                                 |
| 17039133 | 4.25 | 5.35  | 0.26 | 0.13 | -2.15 | 1.84E-09 | 8.76E-07 |                  |                                                                                |
| 16671457 | 5.89 | 6.99  | 0.42 | 0.25 | -2.15 | 6.87E-06 | 0.0002   | IL6R             | interleukin 6 receptor                                                         |
| 16873848 | 5.04 | 6.14  | 0.43 | 0.19 | -2.15 | 1.56E-06 | 8.07E-05 | LIG1             | ligase I, DNA, ATP-dependent                                                   |
| 17041700 | 4.18 | 5.28  | 0.24 | 0.09 | -2.15 | 7.79E-10 | 5.60E-07 |                  |                                                                                |
| 16861318 | 2.46 | 3.57  | 0.16 | 0.35 | -2.15 | 2.33E-07 | 2.13E-05 | WDR62            | WD repeat domain 62                                                            |
| 16897797 | 6.82 | 7.92  | 0.32 | 0.22 | -2.15 | 2.08E-07 | 1.97E-05 | PNPT1            | polyribonucleotide nucleotidyltransferase 1                                    |
| 16889054 | 2.57 | 3.68  | 0.26 | 0.52 | -2.16 | 6.17E-05 | 0.0013   | CCDC150          | coiled-coil domain containing 150                                              |
| 16676526 | 0.96 | 2.07  | 0.3  | 0.69 | -2.16 | 0.0001   | 0.0024   | FAM72A           | family with sequence similarity 72, member A                                   |
| 17107045 | 5.68 | 6.79  | 0.3  | 0.16 | -2.16 | 4.98E-08 | 7.64E-06 | HPRT1            | hypoxanthine phosphoribosyltransferase 1                                       |
| 16804629 | 1.38 | 2.49  | 0.37 | 0.56 | -2.16 | 0.0001   | 0.0025   |                  |                                                                                |
| 17033890 | 2    | 3.11  | 0.66 | 0.41 | -2.16 | 0.0004   | 0.0059   |                  |                                                                                |
| 17038932 | 2    | 3.11  | 0.66 | 0.41 | -2.16 | 0.0004   | 0.0059   |                  |                                                                                |
| 17069545 | 4.18 | 5.29  | 0.6  | 0.45 | -2.16 | 0.0001   | 0.0024   | RRS1             | ribosome biogenesis regulator homolog                                          |
| 16683377 | 2.33 | 3.45  | 0.48 | 0.61 | -2.16 | 0.0007   | 0.0085   | ID3              | inhibitor of DNA binding 3, dominant negative helix-loop-helix protein         |
| 16777401 | 4.94 | 6.05  | 0.41 | 0.26 | -2.16 | 2.85E-06 | 0.0001   | MIPEP            | mitochondrial intermediate peptidase                                           |
| 16843417 | 2.57 | 3.68  | 0.27 | 0.6  | -2.16 | 3.58E-05 | 0.0008   | SLFN12           | schlafen family member 12                                                      |
| 17117588 | 6.45 | 7.57  | 0.22 | 0.14 | -2.16 | 2.28E-09 | 1.03E-06 |                  |                                                                                |
| 16836457 | 4.39 | 5.5   | 0.37 | 0.18 | -2.17 | 3.49E-07 | 2.83E-05 | RAD51C           | RAD51 paralog C                                                                |
| 17083357 | 3.9  | 5.02  | 0.68 | 0.44 | -2.17 | 0.0003   | 0.0041   | CD274            | CD274 molecule                                                                 |
| 16835781 | 3.48 | 4.6   | 0.45 | 0.22 | -2.17 | 2.13E-05 | 0.0006   | XYLT2            | xylosyltransferase II                                                          |
| 16970409 | 5.27 | 6.38  | 0.42 | 0.11 | -2.17 | 4.43E-07 | 3.33E-05 | SPATA5           | spermatogenesis associated 5                                                   |
| 16878890 | 5.82 | 6.93  | 0.18 | 0.22 | -2.17 | 2.99E-09 | 1.18E-06 | TTC27            | tetratricopeptide repeat domain 27                                             |
| 16834196 | 5.1  | 6.22  | 0.41 | 0.25 | -2.17 | 3.55E-05 | 0.0008   | FKBP10           | FK506 binding protein 10                                                       |
| 17097914 | 3.7  | 4.82  | 0.34 | 0.48 | -2.17 | 1.85E-05 | 0.0005   | PHF19            | PHD finger protein 19                                                          |
| 16777502 | 4.41 | 5.53  | 0.17 | 0.31 | -2.17 | 7.06E-08 | 9.52E-06 | CENPJ            | centromere protein J                                                           |
| 16995409 | 7.32 | 8.44  | 0.17 | 0.15 | -2.18 | 3.73E-10 | 3.52E-07 | NUP155           | nucleoporin 155kDa                                                             |
| 17103413 | 3.88 | 5.01  | 0.4  | 0.15 | -2.18 | 2.38E-07 | 2.17E-05 | SUV39H1          | suppressor of variegation 3-9 homolog 1 (Drosophila)                           |
| 16997662 | 1.3  | 2.42  | 0.3  | 0.43 | -2.18 | 1.67E-06 | 8.46E-05 | DHFR             | dihydrofolate reductase                                                        |
| 17084184 | 6.81 | 7.94  | 0.36 | 0.16 | -2.18 | 2.14E-07 | 2.01E-05 | ACO1             | aconitase 1, soluble                                                           |
| 16920548 | 3.1  | 4.23  | 0.2  | 0.51 | -2.19 | 8.62E-06 | 0.0003   | AURKA            | aurora kinase A                                                                |
| 17001800 | 1.57 | 2.7   | 0.34 | 1.1  | -2.19 | 0.0016   | 0.0165   | ANXA6            | annexin A6                                                                     |
| 16959985 | 5.11 | 6.24  | 0.4  | 0.16 | -2.19 | 4.67E-06 | 0.0002   | ATR              | ATR serine/threonine kinase                                                    |
| 17083915 | 5.84 | 6.97  | 0.34 | 0.12 | -2.19 | 2.11E-07 | 1.99E-05 | FOCAD            | focadhesin                                                                     |
| 16884523 | 6.6  | 7.73  | 0.4  | 0.53 | -2.19 | 2.42E-05 | 0.0006   | SLC20A1          | solute carrier family 20 (phosphate transporter), member 1                     |
| 16819213 | 3.52 | 4.65  | 0.81 | 0.68 | -2.19 | 0.0008   | 0.0097   | MT1L; MT1M       | metallothionein 1L (gene/pseudogene); metallothionein 1M                       |
| 16948021 | 6.73 | 7.86  | 0.22 | 0.26 | -2.2  | 2.52E-08 | 4.67E-06 | ECT2             | epithelial cell transforming 2                                                 |
| 16820537 | 7.7  | 8.83  | 0.28 | 0.19 | -2.2  | 4.99E-08 | 7.64E-06 | UTP4             | UTP4 small subunit (SSU) processome component                                  |
| 16925239 | 4.68 | 5.82  | 0.31 | 0.23 | -2.2  | 2.80E-07 | 2.44E-05 | DONSON           | downstream neighbor of SON                                                     |
| 16725735 | 4.43 | 5.57  | 0.2  | 0.32 | -2.2  | 2.49E-08 | 4.66E-06 | FEN1; FADS2      | flap structure-specific endonuclease 1; fatty acid desaturase 2                |
| 16842812 | 4.94 | 6.08  | 0.19 | 0.25 | -2.21 | 1.41E-08 | 3.32E-06 | TLCD1            | TLC domain containing 1                                                        |
| 17019805 | 7.31 | 8.45  | 0.52 | 0.29 | -2.21 | 4.96E-05 | 0.0011   | TNFRSF21         | tumor necrosis factor receptor superfamily, member 21                          |
| 16748449 | 4.94 | 6.08  | 0.33 | 0.27 | -2.21 | 1.87E-07 | 1.83E-05 | MIR1244-1; MIR1  | microRNA 1244-1; microRNA 1244-2; microRNA 1244-3; microRNA 1244-4             |
| 16761116 | 4.94 | 6.08  | 0.33 | 0.27 | -2.21 | 1.87E-07 | 1.83E-05 | MIR1244-1; MIR1  | microRNA 1244-1; microRNA 1244-2; microRNA 1244-3; microRNA 1244-4             |
| 16988297 | 4.94 | 6.08  | 0.33 | 0.27 | -2.21 | 1.87E-07 | 1.83E-05 | MIR1244-1; MIR1  | microRNA 1244-1; microRNA 1244-2; microRNA 1244-3; microRNA 1244-4             |
| 16687418 | 7.34 | 8.49  | 0.23 | 0.09 | -2.21 | 4.55E-10 | 3.88E-07 | NDC1             | NDC1 transmembrane nucleoporin                                                 |
| 17026706 | 4.02 | 5.17  | 0.22 | 0.1  | -2.21 | 2.27E-10 | 2.82E-07 |                  |                                                                                |
| 17031635 | 4.02 | 5.17  | 0.22 | 0.1  | -2.21 | 2.27E-10 | 2.82E-07 |                  |                                                                                |
| 16949562 | 1.91 | 3.06  | 0.47 | 0.62 | -2.22 | 0.0017   | 0.017    | MIR944           | microRNA 944                                                                   |
| 17120002 | 2.04 | 3.19  | 0.33 | 0.26 | -2.22 | 1.39E-07 | 1.51E-05 |                  |                                                                                |
| 16870925 | 2.96 | 4.11  | 0.39 | 0.57 | -2.22 | 0.0002   | 0.0031   | ZNF724P          | zinc finger protein 724, pseudogene                                            |
| 16691046 | 2.98 | 4.14  | 0.46 | 0.3  | -2.22 | 6.83E-06 | 0.0002   | PHTF1            | putative homeodomain transcription factor 1                                    |
| 16938899 | 4.91 | 6.06  | 0.21 | 0.08 | -2.22 | 2.10E-10 | 2.81E-07 | MLH1             | mutL homolog 1                                                                 |
| 17126286 | 4.52 | 5.68  | 0.95 | 0.53 | -2.23 | 0.003    | 0.0275   |                  |                                                                                |
| 16890935 | 1.56 | 2.72  | 0.33 | 0.62 | -2.23 | 0.0002   | 0.0038   | PLCD4            | phospholipase C, delta 4                                                       |
| 16918074 | 4.67 | 5.83  | 0.54 | 0.43 | -2.23 | 0.0003   | 0.0046   | LOC105372580     | uncharacterized LOC105372580                                                   |
| 17031434 | 2.02 | 3.18  | 0.77 | 0.49 | -2.23 | 0.0008   | 0.0096   |                  |                                                                                |
| 16702257 | 5.43 | 6.59  | 0.74 | 0.47 | -2.24 | 0.0002   | 0.0034   | LINC00707        | long intergenic non-protein coding RNA 707                                     |
| 16785316 | 7.31 | 8.47  | 0.34 | 0.18 | -2.24 | 1.03E-07 | 1.21E-05 | MTHFD1           | methylenetetrahydrofolate dehydrogenase (NADP+ dependent) 1, methylenetetrahyd |
| 17028857 | 4.16 | 5.32  | 0.24 | 0.09 | -2.24 | 4.14E-10 | 3.76E-07 |                  |                                                                                |
| 17036357 | 4.16 | 5.32  | 0.24 | 0.09 | -2.24 | 4.14E-10 | 3.76E-07 |                  |                                                                                |
| 16798136 | 2.62 | 3.78  | 0.47 | 0.39 | -2.24 | 3.63E-06 | 0.0002   | SNRPN            | small nuclear ribonucleoprotein polypeptide N                                  |
| 16888143 | 2.94 | 4.1   | 0.58 | 0.33 | -2.25 | 0.0001   | 0.0022   | LOC101927027     | uncharacterized LOC101927027                                                   |
| 17104947 | 4.34 | 5.51  | 0.46 | 0.27 | -2.25 | 8.98E-06 | 0.0003   | SLC16A2          | solute carrier family 16, member 2 (thyroid hormone transporter)               |
| 16728785 | 2.93 | 4.1   | 0.92 | 0.7  | -2.25 | 0.0048   | 0.0393   | LOC105369382     | uncharacterized LOC105369382                                                   |
| 16942648 | 2.01 | 3.18  | 0.52 | 0.49 | -2.25 | 7.57E-05 | 0.0015   | GXYLT2           | glucoside xylosyltransferase 2                                                 |
| 17027743 | 1.39 | 2.56  | 0.31 | 0.72 | -2.25 | 0.0002   | 0.0034   |                  |                                                                                |
| 16799793 | 6.83 | 8.01  | 0.62 | 0.39 | -2.26 | 4.57E-06 | 0.0002   | NUSAP1           | nucleolar and spindle associated protein 1                                     |
| 16670383 | 9.85 | 11.03 | 0.27 | 0.23 | -2.26 | 7.66E-08 | 9.96E-06 | HIST2H2AA4; HIST | histone cluster 2, H2aa4; histone cluster 2, H2aa3                             |
| 16856812 | 4.03 | 5.21  | 0.17 | 0.17 | -2.27 | 6.33E-10 | 4.77E-07 | THOP1            | thimet oligopeptidase 1                                                        |
| 17123142 | 4.98 | 6.16  | 0.36 | 0.24 | -2.27 | 3.26E-07 | 2.70E-05 |                  |                                                                                |

|          |      |       |      |      |       |          |          |                         |                                                                                                |
|----------|------|-------|------|------|-------|----------|----------|-------------------------|------------------------------------------------------------------------------------------------|
| 16852445 | 5.17 | 6.35  | 0.34 | 0.34 | -2.27 | 4.55E-07 | 3.39E-05 | C18orf54                | chromosome 18 open reading frame 54                                                            |
| 16850477 | 6.7  | 7.88  | 0.37 | 0.29 | -2.27 | 1.02E-06 | 6.00E-05 | TYMS                    | thymidylate synthetase                                                                         |
| 16834091 | 3.42 | 4.6   | 0.6  | 0.64 | -2.27 | 0.0026   | 0.0244   | IGFBP4                  | insulin like growth factor binding protein 4                                                   |
| 16729557 | 2.36 | 3.55  | 0.25 | 0.52 | -2.27 | 1.82E-05 | 0.0005   | DDIAS                   | DNA damage-induced apoptosis suppressor                                                        |
| 16913486 | 2.1  | 3.28  | 0.55 | 0.35 | -2.27 | 9.06E-05 | 0.0017   | VSTM2L                  | V-set and transmembrane domain containing 2 like                                               |
| 16995938 | 3.7  | 4.88  | 0.38 | 0.49 | -2.27 | 1.94E-05 | 0.0005   | C5orf34                 | chromosome 5 open reading frame 34                                                             |
| 16681611 | 7.91 | 9.1   | 0.44 | 0.23 | -2.27 | 8.70E-07 | 5.36E-05 | SRM                     | spermidine synthase                                                                            |
| 16955939 | 4.23 | 5.41  | 0.26 | 0.54 | -2.27 | 6.09E-06 | 0.0002   | LRIG1                   | leucine-rich repeats and immunoglobulin-like domains 1                                         |
| 17016360 | 1.17 | 2.36  | 0.29 | 0.46 | -2.28 | 2.54E-06 | 0.0001   | HIST1H4B                | histone cluster 1, H4b                                                                         |
| 16657598 | 4.69 | 5.88  | 0.31 | 0.27 | -2.28 | 2.29E-07 | 2.11E-05 | AGR1                    | agrin                                                                                          |
| 16760048 | 5.2  | 6.39  | 0.27 | 0.33 | -2.28 | 8.99E-08 | 1.10E-05 | FOXM1                   | forkhead box M1                                                                                |
| 16774303 | 3.75 | 4.94  | 1.04 | 0.43 | -2.28 | 0.0028   | 0.0259   | RGCC                    | regulator of cell cycle                                                                        |
| 17085082 | 4.66 | 5.85  | 0.53 | 0.36 | -2.28 | 6.91E-06 | 0.0002   | ALDH1B1                 | aldehyde dehydrogenase 1 family, member B1                                                     |
| 16745139 | 1.64 | 2.83  | 0.27 | 0.5  | -2.29 | 5.91E-06 | 0.0002   |                         |                                                                                                |
| 17005586 | 3.12 | 4.31  | 0.25 | 0.32 | -2.29 | 8.58E-08 | 1.07E-05 | HIST1H4E                | histone cluster 1, H4e                                                                         |
| 16989265 | 3.17 | 4.36  | 0.21 | 0.54 | -2.29 | 1.13E-05 | 0.0004   | JADE2                   | jade family PHD finger 2                                                                       |
| 16780322 | 2.04 | 3.24  | 0.3  | 0.65 | -2.29 | 9.55E-05 | 0.0018   | DZIP1                   | DAZ interacting zinc finger protein 1                                                          |
| 17010552 | 5.44 | 6.63  | 0.51 | 0.49 | -2.29 | 8.71E-06 | 0.0003   | TTK                     | TTK protein kinase                                                                             |
| 16833345 | 8.75 | 9.95  | 0.27 | 0.2  | -2.3  | 3.78E-08 | 6.33E-06 | AP2B1                   | adaptor-related protein complex 2, beta 1 subunit                                              |
| 16689734 | 4.89 | 6.09  | 0.72 | 0.96 | -2.3  | 0.0001   | 0.0025   | MIG7                    | mig-7                                                                                          |
| 16697544 | 5.92 | 7.12  | 0.53 | 0.63 | -2.3  | 9.64E-05 | 0.0018   | ASPM                    | abnormal spindle microtubule assembly                                                          |
| 17101587 | 0.75 | 1.95  | 0.37 | 0.42 | -2.3  | 1.35E-05 | 0.0004   | EGFL6                   | EGF-like-domain, multiple 6                                                                    |
| 16980974 | 1.72 | 2.92  | 0.49 | 0.49 | -2.3  | 7.36E-05 | 0.0015   | FAM198B                 | family with sequence similarity 198, member B                                                  |
| 16666509 | 1.89 | 3.09  | 0.39 | 0.79 | -2.3  | 0.0002   | 0.0034   | IFI44                   | interferon-induced protein 44                                                                  |
| 16798919 | 6.38 | 7.58  | 0.4  | 0.37 | -2.3  | 2.71E-06 | 0.0001   | ARHGAP11A               | Rho GTPase activating protein 11A                                                              |
| 16951756 | 6.68 | 7.89  | 0.34 | 0.39 | -2.3  | 6.13E-06 | 0.0002   | SLC4A7                  | solute carrier family 4, sodium bicarbonate cotransporter, member 7                            |
| 16730429 | 4.87 | 6.08  | 0.5  | 0.44 | -2.31 | 2.86E-05 | 0.0007   | ARHGAP42                | Rho GTPase activating protein 42                                                               |
| 16959505 | 0.82 | 2.02  | 0.27 | 0.73 | -2.31 | 0.0002   | 0.0034   |                         |                                                                                                |
| 17011005 | 2.56 | 3.77  | 0.29 | 0.44 | -2.31 | 2.10E-06 | 0.0001   |                         |                                                                                                |
| 16863104 | 6.19 | 7.4   | 0.43 | 0.25 | -2.31 | 7.91E-07 | 4.99E-05 | TOMM40                  | translocase of outer mitochondrial membrane 40 homolog (yeast)                                 |
| 16714998 | 4.18 | 5.4   | 0.34 | 0.12 | -2.32 | 4.36E-08 | 7.05E-06 | DNA2                    | DNA replication helicase/nuclease 2                                                            |
| 16820483 | 2.98 | 4.2   | 0.45 | 0.4  | -2.32 | 4.15E-06 | 0.0002   | CDH3                    | cadherin 3, type 1, P-cadherin (placental)                                                     |
| 17010354 | 8.33 | 9.54  | 0.83 | 0.47 | -2.32 | 0.0052   | 0.0415   | CD109                   | CD109 molecule                                                                                 |
| 17048879 | 5.57 | 6.78  | 0.38 | 0.28 | -2.32 | 3.09E-06 | 0.0001   | ARPC1B; ARPC1A          | actin related protein 2/3 complex subunit 1B; actin related protein 2/3 complex subunit 1A     |
| 17084904 | 6.53 | 7.74  | 0.31 | 0.19 | -2.32 | 1.69E-08 | 3.69E-06 | MELK                    | maternal embryonic leucine zipper kinase                                                       |
| 16679936 | 4.83 | 6.05  | 0.73 | 0.83 | -2.32 | 0.0013   | 0.0143   |                         |                                                                                                |
| 16748835 | 1.78 | 3     | 0.2  | 0.65 | -2.33 | 9.54E-06 | 0.0003   | PIK3C2G                 | phosphatidylinositol-4-phosphate 3-kinase, catalytic subunit type 2 gamma                      |
| 17065047 | 4.24 | 5.46  | 0.5  | 0.57 | -2.33 | 6.27E-05 | 0.0013   | LOC389831; LOC105379498 | uncharacterized LOC389831; uncharacterized LOC105379498; uncharacterized LOC105379498          |
| 16720077 | 4.86 | 6.08  | 1.03 | 0.87 | -2.33 | 0.0023   | 0.0222   | IFITM2                  | interferon induced transmembrane protein 2                                                     |
| 17080935 | 1.36 | 2.59  | 0.58 | 0.68 | -2.34 | 0.0004   | 0.0051   | LOC105375743            | uncharacterized LOC105375743                                                                   |
| 16897834 | 8.12 | 9.34  | 0.69 | 0.24 | -2.34 | 7.22E-05 | 0.0015   | EFEMP1                  | EGF containing fibulin-like extracellular matrix protein 1                                     |
| 16775324 | 4.64 | 5.87  | 0.45 | 0.61 | -2.34 | 8.21E-05 | 0.0016   | BORA                    | bora, aurora kinase A activator                                                                |
| 17005593 | 5.59 | 6.82  | 0.42 | 0.43 | -2.34 | 2.26E-06 | 0.0001   | HIST1H3E                | histone cluster 1, H3e                                                                         |
| 16937498 | 2.71 | 3.93  | 0.41 | 0.35 | -2.34 | 2.03E-06 | 9.87E-05 | PRRT3-AS1               | PRRT3 antisense RNA 1                                                                          |
| 17066921 | 1.92 | 3.15  | 0.49 | 0.59 | -2.34 | 2.88E-05 | 0.0007   | ADAM28                  | ADAM metallopeptidase domain 28                                                                |
| 16780640 | 3.83 | 5.06  | 0.71 | 0.15 | -2.34 | 7.37E-05 | 0.0015   | LOC105370333            | uncharacterized LOC105370333                                                                   |
| 16926942 | 4.27 | 5.5   | 0.87 | 0.43 | -2.35 | 0.0006   | 0.0075   | USP18                   | ubiquitin specific peptidase 18                                                                |
| 16893846 | 2.35 | 3.58  | 0.52 | 0.81 | -2.35 | 0.0009   | 0.0101   | PXDN                    | peroxidase                                                                                     |
| 17080749 | 5.88 | 7.11  | 0.24 | 0.22 | -2.35 | 1.57E-09 | 8.59E-07 | ATAD2                   | ATPase family, AAA domain containing 2                                                         |
| 16712576 | 2.37 | 3.61  | 0.3  | 0.42 | -2.35 | 5.53E-07 | 3.81E-05 | PRTFDC1                 | phosphoribosyl transferase domain containing 1                                                 |
| 16857258 | 3.87 | 5.11  | 0.43 | 0.41 | -2.36 | 9.19E-07 | 5.59E-05 | UHRF1                   | ubiquitin-like with PHD and ring finger domains 1                                              |
| 16837270 | 9.11 | 10.34 | 0.29 | 0.43 | -2.36 | 5.03E-07 | 3.59E-05 | KPNA2                   | karyopherin alpha 2 (RAG cohort 1, importin alpha 1)                                           |
| 16735861 | 1.93 | 3.17  | 0.35 | 0.25 | -2.36 | 8.52E-08 | 1.07E-05 |                         |                                                                                                |
| 16692583 | 3.28 | 4.52  | 0.33 | 0.72 | -2.36 | 0.0001   | 0.002    |                         |                                                                                                |
| 16819269 | 6.05 | 7.29  | 0.22 | 0.11 | -2.36 | 6.15E-10 | 4.77E-07 | NUP93                   | nucleoporin 93kDa                                                                              |
| 16688386 | 4.91 | 6.15  | 0.34 | 0.61 | -2.36 | 1.12E-05 | 0.0004   | DEPDC1                  | DEP domain containing 1                                                                        |
| 16664118 | 5.65 | 6.89  | 0.22 | 0.12 | -2.36 | 1.34E-10 | 2.22E-07 | NASP                    | nuclear autoantigenic sperm protein (histone-binding)                                          |
| 16832852 | 5.1  | 6.34  | 0.27 | 0.11 | -2.37 | 3.54E-10 | 3.52E-07 | ATAD5                   | ATPase family, AAA domain containing 5                                                         |
| 16896196 | 4.36 | 5.6   | 0.88 | 0.83 | -2.37 | 0.0045   | 0.0375   | XDH                     | xanthine dehydrogenase                                                                         |
| 17012379 | 5.3  | 6.54  | 0.44 | 0.32 | -2.37 | 1.33E-06 | 7.23E-05 | CENPW                   | centromere protein W                                                                           |
| 16774235 | 2.66 | 3.91  | 0.4  | 0.26 | -2.37 | 2.13E-06 | 0.0001   | SLC25A15; MIR62         | solute carrier family 25 (mitochondrial carrier; ornithine transporter) member 15; microRNA 62 |
| 16969495 | 2.98 | 4.22  | 0.36 | 0.59 | -2.37 | 0.0007   | 0.0089   | NPNT                    | nephronectin                                                                                   |
| 17059828 | 7.98 | 9.23  | 0.6  | 0.73 | -2.37 | 8.77E-05 | 0.0017   | TFPI2                   | tissue factor pathway inhibitor 2                                                              |
| 17093260 | 4.42 | 5.67  | 0.44 | 0.37 | -2.37 | 2.68E-06 | 0.0001   | NOL6                    | nucleolar protein 6 (RNA-associated)                                                           |
| 16821239 | 5.32 | 6.56  | 0.26 | 0.18 | -2.37 | 3.62E-09 | 1.30E-06 | CENPN                   | centromere protein N                                                                           |
| 16661192 | 2.25 | 3.5   | 0.62 | 0.42 | -2.38 | 4.75E-05 | 0.0011   | HMG2                    | high mobility group nucleosomal binding domain 2                                               |
| 16673557 | 4.26 | 5.51  | 0.3  | 0.19 | -2.38 | 4.38E-09 | 1.48E-06 | C1orf112                | chromosome 1 open reading frame 112                                                            |
| 16792519 | 4.18 | 5.43  | 0.25 | 0.29 | -2.38 | 3.81E-08 | 6.36E-06 | POLE2                   | polymerase (DNA directed), epsilon 2, accessory subunit                                        |
| 16845172 | 4.57 | 5.82  | 0.28 | 0.26 | -2.38 | 6.79E-08 | 9.32E-06 | PSMC3IP                 | PSMC3 interacting protein                                                                      |
| 17122274 | 7.22 | 8.47  | 0.27 | 0.18 | -2.38 | 1.28E-08 | 3.17E-06 |                         |                                                                                                |
| 17005396 | 5.15 | 6.41  | 0.26 | 0.23 | -2.39 | 1.07E-08 | 2.78E-06 | GMNN                    | geminin, DNA replication inhibitor                                                             |
| 16788142 | 4.49 | 5.74  | 0.24 | 0.12 | -2.39 | 3.56E-10 | 3.52E-07 | VRK1; LINC00618         | vaccinia related kinase 1; long intergenic non-protein coding RNA 618                          |
| 16701398 | 3.33 | 4.59  | 0.38 | 0.43 | -2.39 | 1.79E-05 | 0.0005   |                         |                                                                                                |
| 16890490 | 6.78 | 8.04  | 0.26 | 0.18 | -2.39 | 2.47E-09 | 1.06E-06 | ATIC                    | 5-aminoimidazole-4-carboxamide ribonucleotide formyltransferase/IMP cyclohydrolase             |
| 16813342 | 6.49 | 7.75  | 0.27 | 0.35 | -2.39 | 8.29E-08 | 1.05E-05 | PRC1                    | protein regulator of cytokinesis 1                                                             |
| 16728287 | 4.93 | 6.19  | 0.51 | 0.42 | -2.39 | 1.05E-05 | 0.0003   | ANO1                    | anoctamin 1, calcium activated chloride channel                                                |
| 16717676 | 0.84 | 2.1   | 0.3  | 0.45 | -2.4  | 1.36E-06 | 7.29E-05 |                         |                                                                                                |
| 16717394 | 1.11 | 2.37  | 0.2  | 0.59 | -2.4  | 9.07E-05 | 0.0018   | SLC25A28                | solute carrier family 25 (mitochondrial iron transporter), member 28                           |
| 16877473 | 5.75 | 7.01  | 0.45 | 0.3  | -2.4  | 1.26E-06 | 6.95E-05 | GEN1                    | GEN1 Holliday junction 5 flap endonuclease                                                     |
| 16667206 | 4.8  | 6.06  | 0.18 | 0.33 | -2.4  | 4.41E-08 | 7.08E-06 | CCDC18                  | coiled-coil domain containing 18                                                               |

|          |      |       |      |      |       |          |          |                    |                                                                        |
|----------|------|-------|------|------|-------|----------|----------|--------------------|------------------------------------------------------------------------|
| 16996722 | 5.07 | 6.34  | 0.28 | 0.17 | -2.4  | 7.80E-09 | 2.26E-06 | CENPK              | centromere protein K                                                   |
| 16811684 | 0.82 | 2.08  | 0.28 | 0.56 | -2.4  | 5.12E-06 | 0.0002   | CYP1A1             | cytochrome P450, family 1, subfamily A, polypeptide 1                  |
| 16919044 | 5.53 | 6.8   | 0.17 | 0.09 | -2.41 | 2.76E-12 | 1.53E-08 | RBL1               | retinoblastoma-like 1                                                  |
| 16830912 | 5.87 | 7.14  | 0.31 | 0.28 | -2.41 | 8.72E-08 | 1.08E-05 |                    |                                                                        |
| 16758336 | 5.89 | 7.17  | 0.24 | 0.2  | -2.42 | 1.16E-09 | 7.24E-07 | KNTC1              | kinetochore associated 1                                               |
| 16996612 | 1.79 | 3.06  | 0.49 | 0.35 | -2.42 | 4.87E-06 | 0.0002   | LOC105378992       | uncharacterized LOC105378992                                           |
| 16819813 | 2.82 | 4.1   | 0.66 | 0.56 | -2.42 | 0.0001   | 0.0019   | LINC00920          | long intergenic non-protein coding RNA 920                             |
| 16867784 | 1.27 | 2.55  | 0.56 | 0.96 | -2.42 | 0.0023   | 0.022    | C3                 | complement component 3                                                 |
| 17001299 | 1.48 | 2.76  | 0.14 | 0.52 | -2.42 | 4.61E-07 | 3.40E-05 | DPYSL3             | dihydropyrimidinase-like 3                                             |
| 16992096 | 5.43 | 6.71  | 0.17 | 0.37 | -2.42 | 6.15E-08 | 8.77E-06 | SPDL1              | spindle apparatus coiled-coil protein 1                                |
| 16698984 | 3.09 | 4.37  | 0.46 | 0.83 | -2.42 | 0.0009   | 0.0108   | NEK2               | NIMA-related kinase 2                                                  |
| 16926087 | 2.24 | 3.52  | 0.37 | 0.37 | -2.43 | 7.00E-07 | 4.55E-05 | WDR4               | WD repeat domain 4                                                     |
| 16965190 | 2.16 | 3.44  | 0.24 | 0.27 | -2.43 | 5.72E-09 | 1.80E-06 | CC2D2A             | coiled-coil and C2 domain containing 2A                                |
| 16773946 | 6.72 | 8     | 0.23 | 0.13 | -2.43 | 1.88E-10 | 2.59E-07 | RFC3               | replication factor C subunit 3                                         |
| 17065045 | 1.05 | 2.33  | 0.48 | 0.54 | -2.43 | 3.23E-05 | 0.0008   |                    |                                                                        |
| 17016506 | 8.34 | 9.62  | 0.45 | 0.2  | -2.43 | 1.19E-07 | 1.35E-05 | HIST1H4L           | histone cluster 1, H4l                                                 |
| 17126288 | 4.94 | 6.23  | 1.08 | 0.44 | -2.44 | 0.0019   | 0.0188   |                    |                                                                        |
| 16882544 | 4.84 | 6.13  | 0.74 | 0.32 | -2.44 | 4.82E-05 | 0.0011   | LOC102724642       | anaphase-promoting complex subunit 1-like                              |
| 16886717 | 8.21 | 9.5   | 0.56 | 0.23 | -2.45 | 5.06E-06 | 0.0002   | GALNT5             | polypeptide N-acetylgalactosaminyltransferase 5                        |
| 16764758 | 4.29 | 5.58  | 0.34 | 0.56 | -2.45 | 1.61E-05 | 0.0005   | GALNT6             | polypeptide N-acetylgalactosaminyltransferase 6                        |
| 17118948 | 1.92 | 3.22  | 0.4  | 0.29 | -2.45 | 1.36E-06 | 7.31E-05 |                    |                                                                        |
| 16901957 | 6.46 | 7.76  | 0.48 | 0.38 | -2.46 | 1.12E-06 | 6.37E-05 | CKAP2L             | cytoskeleton associated protein 2-like                                 |
| 17109042 | 4.66 | 5.96  | 0.32 | 0.25 | -2.46 | 1.52E-07 | 1.59E-05 | MID1               | midline 1                                                              |
| 17109211 | 3.64 | 4.94  | 0.25 | 0.24 | -2.46 | 7.25E-09 | 2.13E-06 | FANCB              | Fanconi anemia complementation group B                                 |
| 16673983 | 5.47 | 6.77  | 0.44 | 0.17 | -2.47 | 9.86E-07 | 5.87E-05 | DARS2              | aspartyl-tRNA synthetase 2, mitochondrial                              |
| 16798801 | 5.82 | 7.13  | 0.42 | 0.32 | -2.48 | 4.91E-07 | 3.55E-05 | ARHGAP11B          | Rho GTPase activating protein 11B                                      |
| 16912379 | 6.96 | 8.27  | 0.4  | 0.46 | -2.48 | 3.68E-06 | 0.0002   | TPX2               | TPX2, microtubule-associated                                           |
| 16698947 | 5.46 | 6.77  | 0.42 | 0.82 | -2.48 | 4.41E-05 | 0.001    |                    |                                                                        |
| 16843429 | 3.24 | 4.55  | 0.31 | 0.52 | -2.48 | 3.82E-06 | 0.0002   | SLFN13             | schlafen family member 13                                              |
| 17005600 | 2.02 | 3.33  | 0.5  | 0.44 | -2.48 | 6.95E-06 | 0.0002   | HIST1H2BH          | histone cluster 1, H2bh                                                |
| 16761843 | 3.88 | 5.19  | 0.84 | 0.69 | -2.48 | 0.003    | 0.0272   | ARHGDI1B           | Rho GDP dissociation inhibitor (GDI) beta                              |
| 16996545 | 4.75 | 6.06  | 0.26 | 0.46 | -2.48 | 8.38E-07 | 5.22E-05 | DEPDC1B            | DEP domain containing 1B                                               |
| 17119498 | 3.84 | 5.16  | 0.55 | 0.34 | -2.49 | 1.42E-05 | 0.0004   |                    |                                                                        |
| 17119536 | 3.84 | 5.16  | 0.55 | 0.34 | -2.49 | 1.42E-05 | 0.0004   |                    |                                                                        |
| 17119598 | 3.84 | 5.16  | 0.55 | 0.34 | -2.49 | 1.42E-05 | 0.0004   |                    |                                                                        |
| 17023551 | 3.09 | 4.4   | 0.42 | 0.52 | -2.49 | 3.72E-06 | 0.0002   | EPB41L2            | erythrocyte membrane protein band 4.1-like 2                           |
| 16981444 | 1.67 | 2.99  | 0.47 | 0.34 | -2.49 | 1.39E-06 | 7.41E-05 | AADAT              | aminoadipate aminotransferase                                          |
| 16801557 | 4.79 | 6.11  | 0.38 | 0.62 | -2.49 | 2.29E-05 | 0.0006   | CENB2              | cyclin B2                                                              |
| 17075478 | 3.76 | 5.07  | 0.82 | 0.6  | -2.49 | 0.0007   | 0.0086   | LOXL2; ENTPD4      | lysyl oxidase-like 2; ectonucleoside triphosphate diphosphohydrolase 4 |
| 16984725 | 2.04 | 3.36  | 0.45 | 0.32 | -2.49 | 3.98E-06 | 0.0002   | LOC257396          | uncharacterized LOC257396                                              |
| 16913441 | 1.87 | 3.19  | 0.33 | 0.57 | -2.49 | 2.96E-05 | 0.0007   | NNAT               | neuronatin                                                             |
| 17121372 | 1.57 | 2.9   | 0.52 | 0.7  | -2.5  | 0.0004   | 0.0053   |                    |                                                                        |
| 16686796 | 5.55 | 6.87  | 0.38 | 0.25 | -2.5  | 5.47E-08 | 8.11E-06 | STIL               | SCL/TAL1 interrupting locus                                            |
| 17093397 | 3.17 | 4.49  | 0.33 | 0.23 | -2.5  | 4.43E-08 | 7.08E-06 | KIF24              | kinesin family member 24                                               |
| 16937505 | 5.48 | 6.81  | 0.43 | 0.23 | -2.51 | 1.43E-07 | 1.53E-05 | FANCD2             | Fanconi anemia complementation group D2                                |
| 16962523 | 2.53 | 3.86  | 0.31 | 0.62 | -2.51 | 7.63E-05 | 0.0015   | RPL39L             | ribosomal protein L39-like                                             |
| 16670377 | 5.85 | 7.18  | 0.31 | 0.24 | -2.52 | 2.98E-08 | 5.26E-06 | HIST2H4B; HIST2H4A | histone cluster 2, H4b; histone cluster 2, H4a                         |
| 16692626 | 5.85 | 7.18  | 0.31 | 0.24 | -2.52 | 2.98E-08 | 5.26E-06 | HIST2H4B; HIST2H4A | histone cluster 2, H4b; histone cluster 2, H4a                         |
| 17120356 | 2.03 | 3.36  | 0.47 | 0.79 | -2.52 | 0.0003   | 0.0042   |                    |                                                                        |
| 16849379 | 5.83 | 7.17  | 0.33 | 0.21 | -2.52 | 2.41E-09 | 1.06E-06 | TK1                | thymidine kinase 1, soluble                                            |
| 16766318 | 5.08 | 6.41  | 0.24 | 0.28 | -2.53 | 8.88E-09 | 2.46E-06 | PRIM1              | primase, DNA, polypeptide 1 (49kDa)                                    |
| 16802204 | 6.07 | 7.41  | 0.3  | 0.12 | -2.53 | 6.30E-10 | 4.77E-07 | ZWILCH             | zwich kinetochore protein                                              |
| 16877956 | 4.41 | 5.74  | 0.43 | 0.74 | -2.53 | 0.0003   | 0.0039   | CENPA              | centromere protein A                                                   |
| 16868576 | 6.26 | 7.6   | 0.16 | 0.2  | -2.54 | 1.59E-11 | 6.40E-08 | DNMT1              | DNA (cytosine-5-)-methyltransferase 1                                  |
| 16834056 | 4.31 | 5.66  | 0.35 | 0.38 | -2.54 | 3.27E-07 | 2.70E-05 | CDC6               | cell division cycle 6                                                  |
| 17005589 | 4.99 | 6.34  | 0.32 | 0.37 | -2.54 | 9.30E-08 | 1.14E-05 | HIST1H2AE          | histone cluster 1, H2ae                                                |
| 16887840 | 3.5  | 4.85  | 0.4  | 0.4  | -2.54 | 2.01E-07 | 1.93E-05 | CDCA7              | cell division cycle associated 7                                       |
| 16949261 | 1.6  | 2.95  | 0.46 | 0.44 | -2.55 | 1.69E-05 | 0.0005   |                    |                                                                        |
| 16964000 | 3.42 | 4.77  | 0.23 | 0.38 | -2.55 | 4.84E-08 | 7.56E-06 | TACC3              | transforming, acidic coiled-coil containing protein 3                  |
| 16818600 | 4.85 | 6.2   | 0.22 | 0.21 | -2.55 | 2.28E-10 | 2.82E-07 | ORC6               | origin recognition complex subunit 6                                   |
| 16662648 | 4.51 | 5.87  | 0.43 | 0.41 | -2.55 | 3.03E-06 | 0.0001   | CDCA8              | cell division cycle associated 8                                       |
| 17058617 | 5.38 | 6.73  | 0.23 | 0.19 | -2.55 | 1.67E-10 | 2.52E-07 | RFC2               | replication factor C subunit 2                                         |
| 16733719 | 3.35 | 4.7   | 0.31 | 0.38 | -2.55 | 9.93E-07 | 5.88E-05 | GLB1L2             | galactosidase beta 1 like 2                                            |
| 16906571 | 2.32 | 3.67  | 0.78 | 0.39 | -2.56 | 0.0002   | 0.0031   | STAT4              | signal transducer and activator of transcription 4                     |
| 16868752 | 2.41 | 3.76  | 0.51 | 0.59 | -2.56 | 0.0005   | 0.0061   | S1PR5              | sphingosine-1-phosphate receptor 5                                     |
| 16953279 | 3.39 | 4.74  | 0.39 | 0.53 | -2.56 | 3.38E-06 | 0.0001   | CDC25A             | cell division cycle 25A                                                |
| 17075992 | 4.32 | 5.68  | 0.48 | 0.51 | -2.56 | 4.85E-05 | 0.0011   | LINC00589          | long intergenic non-protein coding RNA 589                             |
| 17123026 | 1.66 | 3.01  | 0.34 | 0.41 | -2.56 | 6.40E-06 | 0.0002   |                    |                                                                        |
| 16798142 | 2.42 | 3.78  | 0.31 | 0.33 | -2.57 | 1.07E-06 | 6.15E-05 | SNRNP              | small nuclear ribonucleoprotein polypeptide N                          |
| 16889268 | 1.31 | 2.66  | 0.53 | 0.76 | -2.57 | 0.0006   | 0.0074   | AOX1               | aldehyde oxidase 1                                                     |
| 16726790 | 3.86 | 5.22  | 0.21 | 0.17 | -2.57 | 6.83E-11 | 1.72E-07 | POLA2              | polymerase (DNA directed), alpha 2, accessory subunit                  |
| 16711695 | 0.9  | 2.26  | 0.39 | 1.05 | -2.57 | 0.001    | 0.0112   | SFTA1P             | surfactant associated 1, pseudogene                                    |
| 16911149 | 2.9  | 4.26  | 0.32 | 0.37 | -2.57 | 1.18E-06 | 6.63E-05 | PCNA-AS1           | PCNA antisense RNA 1                                                   |
| 17061189 | 3.38 | 4.75  | 0.54 | 0.47 | -2.58 | 1.91E-05 | 0.0005   | NAPEPLD            | N-acyl phosphatidylethanolamine phospholipase D                        |
| 16828826 | 5.76 | 7.13  | 0.37 | 0.46 | -2.59 | 1.20E-06 | 6.70E-05 | COTL1              | coactosin-like F-actin binding protein 1                               |
| 17016503 | 9.55 | 10.92 | 0.37 | 0.25 | -2.59 | 8.01E-09 | 2.30E-06 | HIST1H3I           | histone cluster 1, H3i                                                 |
| 16755750 | 4.15 | 5.53  | 0.41 | 0.36 | -2.59 | 4.67E-07 | 3.42E-05 | UTP20              | UTP20 small subunit (SSU) processome component                         |
| 17064135 | 6.32 | 7.7   | 0.58 | 0.24 | -2.6  | 9.55E-06 | 0.0003   | PDIA4              | protein disulfide isomerase family A, member 4                         |
| 16844312 | 7.55 | 8.93  | 0.6  | 0.53 | -2.6  | 1.58E-05 | 0.0005   | TOP2A              | topoisomerase (DNA) II alpha                                           |
| 16889251 | 3.39 | 4.77  | 0.29 | 0.41 | -2.6  | 1.70E-07 | 1.71E-05 | SGOL2              | shugoshin-like 2 (S. pombe)                                            |

|          |      |      |      |      |       |          |          |                |                                                                                            |
|----------|------|------|------|------|-------|----------|----------|----------------|--------------------------------------------------------------------------------------------|
| 16879863 | 5.32 | 6.7  | 0.49 | 0.45 | -2.61 | 1.81E-06 | 9.00E-05 | EPCAM          | epithelial cell adhesion molecule                                                          |
| 16870131 | 2.86 | 4.25 | 0.55 | 0.29 | -2.61 | 5.34E-06 | 0.0002   | HAUS8          | HAUS augmin like complex subunit 8                                                         |
| 16663958 | 5.03 | 6.41 | 0.4  | 0.49 | -2.61 | 4.14E-06 | 0.0002   | KIF2C          | kinesin family member 2C                                                                   |
| 16904780 | 3.1  | 4.49 | 0.44 | 0.3  | -2.61 | 9.31E-07 | 5.60E-05 | SPC25          | SPC25, NDC80 kinetochore complex component                                                 |
| 16804902 | 4.06 | 5.45 | 0.29 | 0.29 | -2.61 | 9.31E-09 | 2.55E-06 | BLM            | Bloom syndrome, RecQ helicase-like                                                         |
| 16945101 | 3.86 | 5.25 | 0.5  | 0.48 | -2.61 | 5.95E-06 | 0.0002   | MCM2           | minichromosome maintenance complex component 2                                             |
| 16927052 | 4.19 | 5.58 | 0.28 | 0.34 | -2.61 | 1.15E-08 | 2.94E-06 | CDC45          | cell division cycle 45                                                                     |
| 16939960 | 3.8  | 5.19 | 0.43 | 0.37 | -2.61 | 1.26E-07 | 1.41E-05 | KIF15          | kinesin family member 15                                                                   |
| 16914315 | 3.4  | 4.79 | 0.44 | 0.68 | -2.62 | 4.28E-05 | 0.001    | UBE2C          | ubiquitin-conjugating enzyme E2C                                                           |
| 16984032 | 6.37 | 7.77 | 0.34 | 0.3  | -2.63 | 5.19E-08 | 7.85E-06 | SKP2           | S-phase kinase-associated protein 2, E3 ubiquitin protein ligase                           |
| 17045198 | 8.14 | 9.54 | 0.44 | 0.3  | -2.64 | 7.64E-08 | 9.96E-06 | ANLN           | anillin actin binding protein                                                              |
| 16747014 | 4.8  | 6.2  | 0.36 | 0.31 | -2.64 | 8.82E-08 | 1.09E-05 | RAD51AP1       | RAD51 associated protein 1                                                                 |
| 17096205 | 2.87 | 4.27 | 0.43 | 0.33 | -2.64 | 2.06E-06 | 9.98E-05 | ZNF367         | zinc finger protein 367                                                                    |
| 16985599 | 5.17 | 6.57 | 0.37 | 0.79 | -2.64 | 9.65E-05 | 0.0018   | CCNB1          | cyclin B1                                                                                  |
| 16852025 | 5.98 | 7.38 | 0.32 | 0.31 | -2.65 | 3.17E-08 | 5.53E-06 | FHOD3          | formin homology 2 domain containing 3                                                      |
| 16799637 | 3.44 | 4.85 | 0.6  | 0.32 | -2.66 | 1.88E-06 | 9.25E-05 | RAD51          | RAD51 recombinase                                                                          |
| 16807605 | 2.43 | 3.84 | 0.47 | 0.31 | -2.66 | 3.96E-07 | 3.10E-05 | OIP5           | Opa interacting protein 5                                                                  |
| 17016363 | 0.43 | 1.84 | 0.44 | 0.54 | -2.67 | 1.44E-06 | 7.62E-05 | HIST1H3B       | histone cluster 1, H3b                                                                     |
| 16951485 | 5.02 | 6.44 | 0.34 | 0.3  | -2.67 | 8.66E-08 | 1.07E-05 | SGOL1          | shugoshin-like 1 (S. pombe)                                                                |
| 16732755 | 2.23 | 3.65 | 0.3  | 0.42 | -2.67 | 3.67E-07 | 2.92E-05 | GRAMD1B        | GRAM domain containing 1B                                                                  |
| 16683105 | 4.7  | 6.12 | 0.53 | 0.4  | -2.67 | 1.61E-05 | 0.0005   | HSPG2          | heparan sulfate proteoglycan 2                                                             |
| 17117441 | 5    | 6.42 | 0.72 | 0.93 | -2.67 | 7.74E-05 | 0.0015   | MIG7           | mig-7                                                                                      |
| 16997676 | 2.58 | 4    | 0.85 | 0.87 | -2.67 | 0.0025   | 0.0235   | MTRNR2L2       | MT-RNR2-like 2                                                                             |
| 16845794 | 3.48 | 4.9  | 0.18 | 0.53 | -2.67 | 3.62E-07 | 2.90E-05 | KIF18B         | kinesin family member 18B                                                                  |
| 16928965 | 0.78 | 2.21 | 0.47 | 1.06 | -2.68 | 0.0011   | 0.0126   |                |                                                                                            |
| 16664243 | 2.73 | 4.16 | 0.4  | 0.24 | -2.69 | 2.27E-08 | 4.36E-06 | RAD54L         | RAD54-like (S. cerevisiae)                                                                 |
| 16873087 | 3.8  | 5.23 | 0.63 | 0.52 | -2.69 | 2.50E-05 | 0.0006   | KCNN4          | potassium channel, calcium activated intermediate/small conductance subfamily N            |
| 16699739 | 4.8  | 6.23 | 0.3  | 0.22 | -2.7  | 7.36E-10 | 5.38E-07 | PARP1          | poly(ADP-ribose) polymerase 1                                                              |
| 16793190 | 6.26 | 7.7  | 0.3  | 0.17 | -2.7  | 1.30E-09 | 7.75E-07 | WDHD1          | WD repeat and HMGB-box DNA binding protein 1                                               |
| 16708910 | 3.86 | 5.3  | 0.36 | 0.49 | -2.71 | 1.22E-06 | 6.78E-05 | SFR1           | SWI5-dependent homologous recombination repair protein 1                                   |
| 17016393 | 0.42 | 1.87 | 0.17 | 0.46 | -2.72 | 4.69E-08 | 7.40E-06 | HIST1H1D       | histone cluster 1, H1d                                                                     |
| 16707468 | 6.64 | 8.09 | 0.58 | 0.24 | -2.72 | 3.62E-07 | 2.90E-05 | KIF11          | kinesin family member 11                                                                   |
| 17086167 | 5.45 | 6.89 | 0.17 | 0.25 | -2.72 | 3.26E-10 | 3.46E-07 | CEP78          | centrosomal protein 78kDa                                                                  |
| 17119464 | 3.2  | 4.65 | 0.56 | 0.4  | -2.72 | 4.03E-06 | 0.0002   |                |                                                                                            |
| 16957951 | 4.96 | 6.4  | 0.32 | 0.3  | -2.73 | 6.91E-08 | 9.44E-06 | POLQ           | polymerase (DNA directed), theta                                                           |
| 16967660 | 3.01 | 4.46 | 0.53 | 0.53 | -2.73 | 9.35E-06 | 0.0003   | MIR181B1       | microRNA 181b-1                                                                            |
| 16963113 | 1.7  | 3.15 | 0.49 | 0.61 | -2.73 | 2.06E-05 | 0.0006   | APOD           | apolipoprotein D                                                                           |
| 16911212 | 6.35 | 7.8  | 0.19 | 0.07 | -2.73 | 1.41E-12 | 1.13E-08 | MCM8           | minichromosome maintenance 8 homologous recombination repair factor                        |
| 16691883 | 4.22 | 5.67 | 0.46 | 0.8  | -2.74 | 8.53E-05 | 0.0017   | FAM72D; FAM72C | family with sequence similarity 72, member D; family with sequence similarity 72, member C |
| 16731654 | 1.99 | 3.45 | 0.55 | 0.99 | -2.74 | 0.0014   | 0.0152   | TAGLN          | transgelin                                                                                 |
| 16972616 | 4.79 | 6.25 | 0.43 | 0.45 | -2.74 | 1.16E-06 | 6.56E-05 | NEIL3          | nei-like DNA glycosylase 3                                                                 |
| 16922584 | 4.64 | 6.1  | 0.25 | 0.33 | -2.75 | 6.69E-09 | 2.05E-06 | CHAF1B; MORC3  | chromatin assembly factor 1, subunit B (p60); MORC family CW-type zinc finger 3            |
| 16802519 | 6.77 | 8.23 | 0.46 | 0.38 | -2.75 | 2.52E-07 | 2.25E-05 | KIF23          | kinesin family member 23                                                                   |
| 16719515 | 7.74 | 9.2  | 0.38 | 0.37 | -2.75 | 9.65E-08 | 1.17E-05 | MKI67          | marker of proliferation Ki-67                                                              |
| 16777278 | 5.69 | 7.15 | 0.41 | 0.24 | -2.75 | 7.63E-08 | 9.96E-06 | SKA3           | spindle and kinetochore associated complex subunit 3                                       |
| 17018497 | 2.42 | 3.88 | 0.53 | 0.28 | -2.76 | 4.81E-07 | 3.50E-05 | FKBP5          | FK506 binding protein 5                                                                    |
| 16707551 | 6.15 | 7.61 | 0.4  | 0.42 | -2.76 | 3.77E-07 | 2.99E-05 | CEP55          | centrosomal protein 55kDa                                                                  |
| 16799315 | 8.18 | 9.65 | 0.47 | 0.46 | -2.76 | 1.50E-06 | 7.85E-05 | THBS1          | thrombospondin 1                                                                           |
| 16735010 | 2.96 | 4.43 | 0.34 | 0.47 | -2.76 | 6.79E-07 | 4.46E-05 | PRKCDBP        | protein kinase C, delta binding protein                                                    |
| 17064939 | 5.19 | 6.66 | 0.43 | 0.2  | -2.77 | 4.23E-08 | 6.87E-06 | NCAPG2         | non-SMC condensin II complex subunit G2                                                    |
| 17016486 | 2.21 | 3.68 | 0.5  | 0.73 | -2.77 | 3.54E-05 | 0.0008   | HIST1H2BL      | histone cluster 1, H2bl                                                                    |
| 16960114 | 6.06 | 7.53 | 0.47 | 0.29 | -2.77 | 2.30E-07 | 2.12E-05 | PLOD2          | procollagen-lysine, 2-oxoglutarate 5-dioxygenase 2                                         |
| 16835797 | 2.99 | 4.46 | 0.45 | 0.46 | -2.78 | 3.13E-06 | 0.0001   | EME1           | essential meiotic structure-specific endonuclease 1                                        |
| 16981219 | 3.71 | 5.19 | 0.58 | 0.56 | -2.79 | 2.66E-05 | 0.0007   | DDX60          | DEAD (Asp-Glu-Ala-Asp) box polypeptide 60                                                  |
| 17067102 | 4.52 | 6    | 0.33 | 0.58 | -2.79 | 1.16E-06 | 6.56E-05 | CDCA2          | cell division cycle associated 2                                                           |
| 16839425 | 1.48 | 2.96 | 0.36 | 0.62 | -2.79 | 1.60E-05 | 0.0005   | SLC43A2        | solute carrier family 43 (amino acid system L transporter), member 2                       |
| 17080595 | 4.1  | 5.59 | 0.48 | 0.39 | -2.81 | 1.81E-06 | 9.02E-05 | DSCC1          | DNA replication and sister chromatid cohesion 1                                            |
| 16746379 | 5.1  | 6.6  | 0.16 | 0.1  | -2.82 | 3.05E-13 | 3.95E-09 | NCAPD3         | non-SMC condensin II complex subunit D3                                                    |
| 16966285 | 1.95 | 3.44 | 0.17 | 0.88 | -2.82 | 0.0001   | 0.002    | UCHL1          | ubiquitin C-terminal hydrolase L1                                                          |
| 16877762 | 3.98 | 5.47 | 0.24 | 0.25 | -2.82 | 4.44E-10 | 3.88E-07 | CENPO          | centromere protein O                                                                       |
| 17093743 | 3.17 | 4.67 | 0.24 | 0.43 | -2.83 | 6.00E-08 | 8.62E-06 | TPM2           | tropomyosin 2 (beta)                                                                       |
| 16852312 | 5    | 6.5  | 0.43 | 0.35 | -2.83 | 2.20E-07 | 2.05E-05 | SKA1           | spindle and kinetochore associated complex subunit 1                                       |
| 17070381 | 3.22 | 4.72 | 0.47 | 0.22 | -2.83 | 5.22E-08 | 7.86E-06 | LRRC1          | leucine rich repeat and coiled-coil centrosomal protein 1                                  |
| 17023484 | 3.94 | 5.44 | 0.38 | 0.46 | -2.83 | 1.81E-07 | 1.80E-05 | ARHGAP18       | Rho GTPase activating protein 18                                                           |
| 17078134 | 3.96 | 5.46 | 0.28 | 0.45 | -2.83 | 2.54E-07 | 2.26E-05 | EYA1           | EYA transcriptional coactivator and phosphatase 1                                          |
| 16669212 | 4.07 | 5.58 | 0.39 | 0.22 | -2.83 | 1.30E-08 | 3.18E-06 | TTF2           | transcription termination factor, RNA polymerase II                                        |
| 16784299 | 5.15 | 6.65 | 0.41 | 0.69 | -2.83 | 9.33E-06 | 0.0003   | CDKN3          | cyclin-dependent kinase inhibitor 3                                                        |
| 16869588 | 3.14 | 4.65 | 0.39 | 0.17 | -2.84 | 3.46E-09 | 1.28E-06 | ASF1B          | anti-silencing function 1B histone chaperone                                               |
| 16979515 | 7.07 | 8.58 | 0.36 | 0.36 | -2.85 | 4.82E-08 | 7.54E-06 | CCNA2          | cyclin A2                                                                                  |
| 16842673 | 5.07 | 6.58 | 0.5  | 0.45 | -2.85 | 9.32E-07 | 5.60E-05 | SPAG5          | sperm associated antigen 5                                                                 |
| 17016383 | 5    | 6.52 | 0.62 | 0.3  | -2.86 | 5.61E-07 | 3.84E-05 | HIST1H4D       | histone cluster 1, H4d                                                                     |
| 17057525 | 1.88 | 3.39 | 0.32 | 0.45 | -2.86 | 1.45E-07 | 1.54E-05 | TNS3           | tensin 3                                                                                   |
| 17093724 | 2.34 | 3.86 | 0.27 | 0.48 | -2.89 | 1.03E-07 | 1.21E-05 | ARHGEF39       | Rho guanine nucleotide exchange factor 39                                                  |
| 16850107 | 6.69 | 8.23 | 0.48 | 0.23 | -2.9  | 1.60E-07 | 1.64E-05 | FASN           | fatty acid synthase                                                                        |
| 16906615 | 3.44 | 4.98 | 0.49 | 0.42 | -2.9  | 1.07E-06 | 6.15E-05 | SDPR           | serum deprivation response                                                                 |
| 16692614 | 2.04 | 3.58 | 0.52 | 0.48 | -2.91 | 1.17E-06 | 6.61E-05 | HIST2H3D       | histone cluster 2, H3d                                                                     |
| 16817017 | 6.39 | 7.94 | 0.46 | 0.73 | -2.92 | 4.59E-05 | 0.001    | PLK1           | polo-like kinase 1                                                                         |
| 16755498 | 5.26 | 6.81 | 0.23 | 0.24 | -2.92 | 8.64E-11 | 1.83E-07 | TMPO           | thymopoietin                                                                               |
| 17099076 | 5.26 | 6.81 | 0.59 | 0.27 | -2.92 | 8.08E-07 | 5.09E-05 | PTGES          | prostaglandin E synthase                                                                   |
| 16901755 | 5.46 | 7    | 0.33 | 0.48 | -2.92 | 9.75E-08 | 1.17E-05 | BUB1           | BUB1 mitotic checkpoint serine/threonine kinase                                            |

|          |      |      |      |      |       |          |          |                  |                                                                                   |
|----------|------|------|------|------|-------|----------|----------|------------------|-----------------------------------------------------------------------------------|
| 17004911 | 1.93 | 3.48 | 0.68 | 0.49 | -2.92 | 1.32E-05 | 0.0004   |                  |                                                                                   |
| 16943230 | 0.78 | 2.33 | 0.25 | 1.44 | -2.92 | 0.0021   | 0.0202   | LOC105374003     | uncharacterized LOC105374003                                                      |
| 16697695 | 6.07 | 7.62 | 0.42 | 0.59 | -2.92 | 3.21E-06 | 0.0001   | KIF14            | kinesin family member 14                                                          |
| 16999475 | 4.18 | 5.73 | 1.04 | 0.76 | -2.93 | 0.0013   | 0.0143   | FBN2             | fibrillin 2                                                                       |
| 17102230 | 5.1  | 6.65 | 0.22 | 0.16 | -2.94 | 2.65E-12 | 1.53E-08 | POLA1            | polymerase (DNA directed), alpha 1, catalytic subunit                             |
| 16982635 | 4.27 | 5.83 | 0.25 | 0.26 | -2.94 | 3.30E-10 | 3.46E-07 | TRIP13           | thyroid hormone receptor interactor 13                                            |
| 16929855 | 5.03 | 6.59 | 0.61 | 0.35 | -2.94 | 6.99E-06 | 0.0002   | LGALS1           | lectin, galactoside-binding, soluble, 1                                           |
| 16663514 | 6.07 | 7.63 | 0.33 | 0.7  | -2.95 | 5.98E-06 | 0.0002   | CDC20            | cell division cycle 20                                                            |
| 17076867 | 7.11 | 8.67 | 0.42 | 0.18 | -2.95 | 4.12E-08 | 6.73E-06 | PRKDC            | protein kinase, DNA-activated, catalytic polypeptide                              |
| 16799598 | 5.73 | 7.29 | 0.28 | 0.39 | -2.96 | 1.03E-08 | 2.73E-06 | CASC5            | cancer susceptibility candidate 5                                                 |
| 16931384 | 3.78 | 5.35 | 0.45 | 0.69 | -2.96 | 1.11E-05 | 0.0004   | GTSE1            | G-2 and S-phase expressed 1                                                       |
| 16809748 | 2.19 | 3.75 | 0.58 | 0.57 | -2.97 | 5.39E-06 | 0.0002   | MNS1             | meiosis-specific nuclear structural 1                                             |
| 16979389 | 4.59 | 6.16 | 0.24 | 0.38 | -2.97 | 6.84E-09 | 2.07E-06 | MAD2L1           | MAD2 mitotic arrest deficient-like 1 (yeast)                                      |
| 17068385 | 2.44 | 4.02 | 0.27 | 0.26 | -2.98 | 7.90E-10 | 5.60E-07 | GIN5A            | GIN5 complex subunit 4 (Sid5 homolog)                                             |
| 16978568 | 5.35 | 6.93 | 0.61 | 0.51 | -2.98 | 6.20E-06 | 0.0002   | CENPE            | centromere protein E                                                              |
| 16692580 | 3.17 | 4.75 | 0.38 | 0.29 | -2.99 | 7.13E-09 | 2.12E-06 | HIST2H2BB; HIST2 | histone cluster 2, H2bb (pseudogene); histone cluster 2, H3, pseudogene 2         |
| 17117537 | 4.34 | 5.93 | 0.58 | 0.35 | -3    | 2.59E-06 | 0.0001   | LOC100131262     | uncharacterized LOC100131262                                                      |
| 17055501 | 1.32 | 2.9  | 0.22 | 0.8  | -3    | 1.68E-05 | 0.0005   | AGR2             | anterior gradient 2, protein disulphide isomerase family member                   |
| 16991859 | 6.07 | 7.65 | 0.33 | 0.47 | -3    | 8.57E-08 | 1.07E-05 | HMMR             | hyaluronan-mediated motility receptor (RHAMM)                                     |
| 16736891 | 4.3  | 5.89 | 0.45 | 0.62 | -3.01 | 3.60E-06 | 0.0002   | KIF18A           | kinesin family member 18A                                                         |
| 16745281 | 1.25 | 2.84 | 0.44 | 0.59 | -3.01 | 1.54E-05 | 0.0005   | MCAM             | melanoma cell adhesion molecule                                                   |
| 16963241 | 5.65 | 7.24 | 0.29 | 0.54 | -3.01 | 1.03E-06 | 6.04E-05 | TFRC             | transferrin receptor                                                              |
| 16723134 | 0.55 | 2.14 | 0.23 | 1.21 | -3.02 | 0.0006   | 0.0082   | LOC105376603     | uncharacterized LOC105376603                                                      |
| 17020019 | 5.84 | 7.44 | 0.39 | 0.37 | -3.02 | 1.53E-07 | 1.59E-05 | MCM3             | minichromosome maintenance complex component 3                                    |
| 16838359 | 3.6  | 5.2  | 0.48 | 0.5  | -3.02 | 9.24E-07 | 5.59E-05 | BIRC5            | baculoviral IAP repeat containing 5                                               |
| 16804559 | 5.83 | 7.43 | 0.41 | 0.13 | -3.03 | 2.26E-09 | 1.03E-06 | FANCI            | Fanconi anemia complementation group I                                            |
| 16912192 | 4.64 | 6.25 | 0.17 | 0.3  | -3.04 | 1.39E-10 | 2.23E-07 | GIN51            | GIN5 complex subunit 1 (Psf1 homolog)                                             |
| 17027710 | 3.67 | 5.28 | 0.39 | 0.29 | -3.05 | 1.76E-08 | 3.70E-06 |                  |                                                                                   |
| 17030560 | 3.67 | 5.28 | 0.39 | 0.29 | -3.05 | 1.76E-08 | 3.70E-06 |                  |                                                                                   |
| 17033265 | 3.67 | 5.28 | 0.39 | 0.29 | -3.05 | 1.76E-08 | 3.70E-06 |                  |                                                                                   |
| 17035356 | 3.67 | 5.28 | 0.39 | 0.29 | -3.05 | 1.76E-08 | 3.70E-06 |                  |                                                                                   |
| 17038044 | 3.67 | 5.28 | 0.39 | 0.29 | -3.05 | 1.76E-08 | 3.70E-06 |                  |                                                                                   |
| 17040632 | 3.67 | 5.28 | 0.39 | 0.29 | -3.05 | 1.76E-08 | 3.70E-06 |                  |                                                                                   |
| 17104484 | 5.45 | 7.06 | 0.55 | 0.45 | -3.05 | 2.31E-06 | 0.0001   | KIF4A            | kinesin family member 4A                                                          |
| 16803562 | 3.8  | 5.41 | 0.79 | 0.51 | -3.05 | 6.89E-05 | 0.0014   | CHRNA5           | cholinergic receptor, nicotinic alpha 5                                           |
| 16843374 | 4.26 | 5.87 | 0.4  | 0.38 | -3.06 | 1.79E-07 | 1.78E-05 | RAD51D           | RAD51 paralogue D                                                                 |
| 17051553 | 5.88 | 7.5  | 0.43 | 0.71 | -3.08 | 2.39E-05 | 0.0006   | CPA4             | carboxypeptidase A4                                                               |
| 17077191 | 1.22 | 2.85 | 0.49 | 0.72 | -3.09 | 9.61E-06 | 0.0003   | LOC100507516     | uncharacterized LOC100507516                                                      |
| 16779546 | 5.75 | 7.38 | 0.4  | 0.22 | -3.1  | 3.73E-09 | 1.30E-06 | DIAPH3           | diaphanous-related formin 3                                                       |
| 16714504 | 3.66 | 5.31 | 0.3  | 0.26 | -3.13 | 3.37E-09 | 1.27E-06 | ZWINT            | ZW10 interacting kinetochore protein                                              |
| 17110401 | 3.32 | 4.97 | 0.69 | 0.3  | -3.13 | 1.66E-05 | 0.0005   | SLC9A7           | solute carrier family 9, subfamily A (NHE7, cation proton antiporter 7), member 7 |
| 16707695 | 4.39 | 6.04 | 0.3  | 0.21 | -3.13 | 9.84E-11 | 1.90E-07 | HELLS            | helicase, lymphoid-specific                                                       |
| 16760621 | 2.75 | 4.4  | 0.36 | 0.51 | -3.13 | 3.31E-07 | 2.72E-05 | CDCA3            | cell division cycle associated 3                                                  |
| 16698023 | 6.01 | 7.67 | 0.3  | 0.19 | -3.15 | 1.80E-10 | 2.59E-07 | UBE2T            | ubiquitin conjugating enzyme E2T                                                  |
| 16999167 | 1.6  | 3.26 | 0.6  | 0.66 | -3.15 | 4.37E-05 | 0.001    |                  |                                                                                   |
| 16705159 | 4.97 | 6.62 | 0.67 | 0.37 | -3.16 | 5.35E-07 | 3.72E-05 | CDK1             | cyclin-dependent kinase 1                                                         |
| 17125788 | 7.66 | 9.32 | 0.51 | 0.36 | -3.16 | 4.05E-07 | 3.13E-05 |                  |                                                                                   |
| 16829764 | 4.51 | 6.17 | 0.34 | 0.41 | -3.17 | 7.72E-08 | 9.98E-06 | GSG2             | germ cell associated 2 (haspin)                                                   |
| 16965346 | 7.43 | 9.1  | 0.35 | 0.16 | -3.18 | 6.29E-11 | 1.72E-07 | NCAPG            | non-SMC condensin I complex subunit G                                             |
| 16669437 | 7.35 | 9.02 | 0.58 | 0.35 | -3.19 | 8.39E-07 | 5.22E-05 | HIST2H2BA        | histone cluster 2, H2ba (pseudogene)                                              |
| 16667037 | 4.97 | 6.65 | 0.47 | 0.41 | -3.19 | 1.20E-07 | 1.35E-05 | CDC7             | cell division cycle 7                                                             |
| 16991741 | 1.95 | 3.63 | 0.63 | 0.49 | -3.2  | 1.05E-05 | 0.0003   | PTTG1            | pituitary tumor-transforming 1                                                    |
| 16840902 | 5.51 | 7.19 | 0.39 | 0.24 | -3.2  | 4.02E-09 | 1.39E-06 | AURKB            | aurora kinase B                                                                   |
| 16850517 | 5.01 | 6.69 | 0.44 | 0.32 | -3.2  | 1.27E-08 | 3.15E-06 | NDC80            | NDC80 kinetochore complex component                                               |
| 16677201 | 6.04 | 7.72 | 0.32 | 0.32 | -3.2  | 8.16E-10 | 5.70E-07 | DTL              | denticleless E3 ubiquitin protein ligase homolog (Drosophila)                     |
| 16745236 | 4.12 | 5.8  | 0.18 | 0.3  | -3.22 | 8.15E-11 | 1.83E-07 | H2AFX            | H2A histone family, member X                                                      |
| 16815090 | 3.8  | 5.5  | 0.37 | 0.77 | -3.23 | 1.38E-05 | 0.0004   | CCNF             | cyclin F                                                                          |
| 16882975 | 5.02 | 6.72 | 0.25 | 0.27 | -3.26 | 1.08E-10 | 1.93E-07 | NCAPH            | non-SMC condensin I complex subunit H                                             |
| 16702571 | 5.13 | 6.84 | 0.52 | 0.28 | -3.26 | 1.65E-08 | 3.61E-06 | MCM10            | minichromosome maintenance 10 replication initiation factor                       |
| 16693082 | 1.83 | 3.55 | 0.38 | 0.91 | -3.3  | 0.0002   | 0.0037   | SELENBP1         | selenium binding protein 1                                                        |
| 16989636 | 5.84 | 7.56 | 0.49 | 0.88 | -3.3  | 3.75E-05 | 0.0009   | KIF20A           | kinesin family member 20A                                                         |
| 17016499 | 6.91 | 8.63 | 0.54 | 0.38 | -3.31 | 7.55E-08 | 9.95E-06 | HIST1H1B         | histone cluster 1, H1b                                                            |
| 17024980 | 1.57 | 3.3  | 0.21 | 0.24 | -3.32 | 5.60E-12 | 2.70E-08 | FBXO5            | F-box protein 5                                                                   |
| 17096904 | 4.36 | 6.08 | 0.25 | 0.61 | -3.32 | 1.52E-07 | 1.59E-05 | CTNNA1           | catenin (cadherin-associated protein), alpha-like 1                               |
| 17005797 | 2.34 | 4.07 | 0.42 | 0.69 | -3.32 | 2.45E-06 | 0.0001   | MIR3143          | microRNA 3143                                                                     |
| 16826160 | 5.79 | 7.52 | 0.31 | 0.26 | -3.32 | 4.37E-10 | 3.88E-07 | SHCBP1           | SHC SH2-domain binding protein 1                                                  |
| 16981502 | 2.7  | 4.44 | 0.79 | 1.08 | -3.33 | 0.0036   | 0.0315   | LOC105377538     | uncharacterized LOC105377538                                                      |
| 17018408 | 2.89 | 4.63 | 0.84 | 0.86 | -3.35 | 0.0002   | 0.0029   | SPDEF            | SAM pointed domain containing ETS transcription factor                            |
| 16692636 | 7.28 | 9.03 | 0.49 | 0.43 | -3.36 | 1.42E-07 | 1.53E-05 | HIST2H2AB        | histone cluster 2, H2ab                                                           |
| 17067332 | 3.53 | 5.28 | 0.29 | 0.3  | -3.37 | 5.05E-10 | 4.06E-07 | ESCO2            | establishment of sister chromatid cohesion N-acetyltransferase 2                  |
| 16684144 | 3.63 | 5.39 | 0.77 | 0.51 | -3.38 | 3.18E-05 | 0.0008   | PTAFR            | platelet-activating factor receptor                                               |
| 16913957 | 5.04 | 6.8  | 0.28 | 0.22 | -3.4  | 4.93E-11 | 1.48E-07 | MYBL2            | v-myb avian myeloblastosis viral oncogene homolog-like 2                          |
| 16793225 | 5.65 | 7.41 | 0.55 | 0.61 | -3.4  | 3.55E-06 | 0.0002   | DLGAP5           | discs, large (Drosophila) homolog-associated protein 5                            |
| 16675398 | 4.79 | 6.55 | 0.96 | 0.3  | -3.41 | 1.68E-05 | 0.0005   | CFH              | complement factor H                                                               |
| 16829369 | 3.76 | 5.53 | 0.28 | 0.24 | -3.41 | 1.09E-10 | 1.93E-07 | FANCA            | Fanconi anemia complementation group A                                            |
| 16804631 | 5.17 | 6.96 | 0.38 | 0.42 | -3.46 | 1.28E-07 | 1.42E-05 | TICRR            | TOPBP1-interacting checkpoint and replication regulator                           |
| 16847432 | 5.12 | 6.91 | 0.48 | 0.29 | -3.46 | 6.57E-08 | 9.10E-06 | BRIP1            | BRCA1 interacting protein C-terminal helicase 1                                   |
| 16975954 | 6.09 | 7.88 | 0.25 | 0.27 | -3.46 | 6.42E-11 | 1.72E-07 | SCFD2            | sec1 family domain containing 2                                                   |
| 16670387 | 5.29 | 7.08 | 0.36 | 0.43 | -3.47 | 1.10E-08 | 2.83E-06 | HIST2H3A; HIST2H | histone cluster 2, H3a; histone cluster 2, H3c                                    |
| 16692616 | 5.29 | 7.08 | 0.36 | 0.43 | -3.47 | 1.10E-08 | 2.83E-06 | HIST2H3A; HIST2H | histone cluster 2, H3a; histone cluster 2, H3c                                    |

|          |      |      |      |      |        |          |          |                        |                                                                                              |
|----------|------|------|------|------|--------|----------|----------|------------------------|----------------------------------------------------------------------------------------------|
| 16679650 | 3.43 | 5.23 | 0.45 | 0.28 | -3.48  | 1.72E-08 | 3.70E-06 | SCCPDH                 | saccharopine dehydrogenase (putative)                                                        |
| 16708728 | 2.57 | 4.37 | 0.45 | 0.23 | -3.48  | 9.68E-09 | 2.62E-06 | SFXN2                  | sideroflexin 2                                                                               |
| 16957170 | 4.86 | 6.67 | 0.33 | 0.25 | -3.51  | 2.82E-10 | 3.16E-07 | KIAA1524               | KIAA1524                                                                                     |
| 17110404 | 3.93 | 5.76 | 0.63 | 0.39 | -3.56  | 6.20E-06 | 0.0002   | SLC9A7                 | solute carrier family 9, subfamily A (NHE7, cation proton antiporter 7), member 7            |
| 16711413 | 5.44 | 7.29 | 0.64 | 0.71 | -3.6   | 8.44E-06 | 0.0003   | LOC105376382           | uncharacterized LOC105376382                                                                 |
| 16877019 | 5.41 | 7.27 | 0.16 | 0.17 | -3.62  | 5.09E-14 | 2.46E-09 | RRM2                   | ribonucleotide reductase M2                                                                  |
| 16679411 | 4.44 | 6.31 | 0.39 | 0.28 | -3.66  | 2.58E-10 | 2.97E-07 | EXO1                   | exonuclease 1                                                                                |
| 16664388 | 1.9  | 3.78 | 0.65 | 0.73 | -3.67  | 1.45E-05 | 0.0004   | CYP4X1                 | cytochrome P450, family 4, subfamily X, polypeptide 1                                        |
| 16854801 | 1.98 | 3.86 | 0.97 | 1.07 | -3.68  | 0.0024   | 0.0228   | MIR924                 | microRNA 924                                                                                 |
| 16798130 | 2.64 | 4.54 | 0.94 | 0.36 | -3.73  | 4.43E-05 | 0.001    | SNRPN                  | small nuclear ribonucleoprotein polypeptide N                                                |
| 17016490 | 1.38 | 3.28 | 0.55 | 0.58 | -3.75  | 3.97E-07 | 3.10E-05 | HIST1H2AJ              | histone cluster 1, H2aj                                                                      |
| 17075776 | 6.15 | 8.06 | 0.55 | 0.34 | -3.75  | 2.16E-08 | 4.30E-06 | PBK                    | PDZ binding kinase                                                                           |
| 16711422 | 4.2  | 6.11 | 0.77 | 0.73 | -3.76  | 0.0001   | 0.002    | LOC102723629           | uncharacterized LOC102723629                                                                 |
| 17105401 | 4.98 | 6.9  | 0.48 | 0.16 | -3.78  | 1.81E-09 | 8.76E-07 | CENPI                  | centromere protein I                                                                         |
| 17087413 | 3.29 | 5.24 | 0.63 | 0.36 | -3.85  | 6.79E-07 | 4.46E-05 | GALNT12                | polypeptide N-acetylgalactosaminyltransferase 12                                             |
| 16976827 | 2.28 | 4.22 | 0.97 | 1.24 | -3.86  | 0.0009   | 0.0103   | CXCL5                  | chemokine (C-X-C motif) ligand 5                                                             |
| 17084352 | 2.24 | 4.2  | 1.05 | 0.36 | -3.88  | 3.33E-05 | 0.0008   |                        |                                                                                              |
| 16909700 | 5.31 | 7.29 | 0.4  | 0.52 | -3.94  | 3.78E-08 | 6.33E-06 | HJURP                  | Holliday junction recognition protein                                                        |
| 17005858 | 6.11 | 8.1  | 0.61 | 0.52 | -3.97  | 4.12E-07 | 3.16E-05 | HIST1H2AI              | histone cluster 1, H2ai                                                                      |
| 17005535 | 1.87 | 3.86 | 0.67 | 0.65 | -3.99  | 6.64E-07 | 4.39E-05 | HIST1H4A               | histone cluster 1, H4a                                                                       |
| 16748496 | 0.38 | 2.4  | 0.27 | 1.33 | -4.06  | 0.0003   | 0.0041   | APOLD1                 | apolipoprotein L domain containing 1                                                         |
| 17016369 | 1.48 | 3.51 | 0.25 | 0.78 | -4.09  | 6.49E-06 | 0.0002   | HIST1H2BB              | histone cluster 1, H2bb                                                                      |
| 17059323 | 6.25 | 8.29 | 0.59 | 0.53 | -4.11  | 4.25E-07 | 3.24E-05 | SEMA3A                 | sema domain, immunoglobulin domain (Ig), short basic domain, secreted, (semaphorin)          |
| 17005603 | 1.69 | 3.75 | 0.45 | 0.6  | -4.15  | 7.55E-08 | 9.95E-06 | HIST1H2BI              | histone cluster 1, H2bi                                                                      |
| 16748346 | 3.91 | 5.98 | 1.09 | 0.41 | -4.2   | 1.30E-05 | 0.0004   | LOC101928100           | uncharacterized LOC101928100                                                                 |
| 16977868 | 1.23 | 3.31 | 0.41 | 0.45 | -4.22  | 8.26E-09 | 2.33E-06 | ABCG2                  | ATP binding cassette subfamily G member 2 (Junior blood group)                               |
| 16800355 | 4.93 | 7.01 | 0.23 | 0.36 | -4.22  | 7.13E-11 | 1.72E-07 | WDR76                  | WD repeat domain 76                                                                          |
| 16988703 | 5.58 | 7.68 | 0.24 | 0.2  | -4.31  | 3.28E-13 | 3.95E-09 | LMNB1                  | lamin B1                                                                                     |
| 16828886 | 3.32 | 5.44 | 0.47 | 0.36 | -4.35  | 1.57E-09 | 8.59E-07 | GIN52                  | GINS complex subunit 2 (Psf2 homolog)                                                        |
| 16829570 | 5.33 | 7.46 | 1.24 | 0.83 | -4.35  | 0.0012   | 0.013    | SERPINF1               | serpin peptidase inhibitor, clade F (alpha-2 antiplasmin, pigment epithelium derived factor) |
| 16903090 | 5.37 | 7.51 | 0.44 | 0.48 | -4.41  | 1.87E-07 | 1.83E-05 | MCM6                   | minichromosome maintenance complex component 6                                               |
| 17016496 | 3.23 | 5.38 | 0.84 | 0.28 | -4.41  | 7.55E-08 | 9.95E-06 | HIST1H2AK              | histone cluster 1, H2ak                                                                      |
| 17016400 | 6.04 | 8.21 | 0.65 | 0.3  | -4.51  | 3.02E-08 | 5.32E-06 | HIST1H3F               | histone cluster 1, H3f                                                                       |
| 16685165 | 4.27 | 6.45 | 0.43 | 0.52 | -4.52  | 2.40E-08 | 4.56E-06 | CLSPN                  | claspin                                                                                      |
| 17016512 | 1.86 | 4.08 | 0.47 | 0.45 | -4.66  | 6.21E-09 | 1.93E-06 | HIST1H2AM; HIST1H2AK   | histone cluster 1, H2am; histone cluster 1, H3j                                              |
| 16868838 | 3.43 | 5.69 | 0.46 | 0.51 | -4.79  | 6.93E-09 | 2.07E-06 | SPC24                  | SPC24, NDC80 kinetochore complex component                                                   |
| 16975234 | 2.6  | 4.86 | 0.6  | 0.82 | -4.79  | 2.89E-07 | 2.50E-05 | TMEM156                | transmembrane protein 156                                                                    |
| 16753663 | 3.2  | 5.48 | 0.9  | 0.9  | -4.85  | 0.0002   | 0.0034   |                        |                                                                                              |
| 16843480 | 2.91 | 5.2  | 0.8  | 0.52 | -4.89  | 7.16E-06 | 0.0003   | MMP28                  | matrix metalloproteinase 28                                                                  |
| 16813790 | 0.85 | 3.14 | 0.45 | 0.51 | -4.91  | 1.71E-08 | 3.70E-06 |                        |                                                                                              |
| 17076726 | 3.14 | 5.44 | 0.63 | 0.65 | -4.92  | 1.58E-07 | 1.63E-05 | PLAT                   | plasminogen activator, tissue                                                                |
| 16971272 | 3.58 | 5.91 | 0.4  | 0.43 | -5     | 1.18E-09 | 7.24E-07 | EDNRA                  | endothelin receptor type A                                                                   |
| 16725041 | 4.93 | 7.3  | 0.56 | 0.74 | -5.17  | 1.18E-06 | 6.66E-05 | FAM111B                | family with sequence similarity 111, member B                                                |
| 17048563 | 4.36 | 6.8  | 0.42 | 0.37 | -5.45  | 1.87E-10 | 2.59E-07 | PEG10                  | paternally expressed 10                                                                      |
| 17016403 | 5.54 | 8    | 0.74 | 0.48 | -5.49  | 5.69E-08 | 8.31E-06 | HIST1H3G               | histone cluster 1, H3g                                                                       |
| 16890058 | 3.7  | 6.3  | 0.67 | 0.51 | -6.06  | 2.01E-07 | 1.93E-05 | LOC105373853           | uncharacterized LOC105373853                                                                 |
| 16684080 | 2.68 | 5.32 | 1.66 | 1.22 | -6.24  | 0.0027   | 0.0254   | IFI6                   | interferon, alpha-inducible protein 6                                                        |
| 17016356 | 2.45 | 5.15 | 0.45 | 0.51 | -6.49  | 3.59E-10 | 3.52E-07 | HIST1H1A               | histone cluster 1, H1a                                                                       |
| 17104519 | 1.2  | 3.92 | 0.72 | 1.01 | -6.58  | 5.85E-06 | 0.0002   |                        |                                                                                              |
| 17016509 | 2.56 | 5.31 | 0.59 | 0.53 | -6.73  | 2.48E-08 | 4.66E-06 | HIST1H3J               | histone cluster 1, H3j                                                                       |
| 17005532 | 2.67 | 5.44 | 1.12 | 0.57 | -6.84  | 7.91E-05 | 0.0016   | HIST1H3A               | histone cluster 1, H3a                                                                       |
| 17097661 | 5.01 | 7.79 | 1.27 | 0.42 | -6.87  | 9.01E-06 | 0.0003   | TNC                    | tenascin C                                                                                   |
| 17016366 | 3.14 | 6.01 | 0.38 | 0.59 | -7.28  | 1.49E-09 | 8.57E-07 | HIST1H2AB              | histone cluster 1, H2ab                                                                      |
| 16913341 | 3.06 | 5.98 | 1.17 | 1.06 | -7.57  | 4.30E-05 | 0.001    | MYL9                   | myosin light chain 9                                                                         |
| 17005865 | 6.76 | 9.71 | 0.74 | 0.6  | -7.7   | 1.72E-09 | 8.59E-07 | HIST1H2BM              | histone cluster 1, H2bm                                                                      |
| 16782122 | 1.65 | 4.68 | 1.02 | 1.71 | -8.15  | 0.0007   | 0.0085   | TRAV20; TRAJ17; TRAJ18 | T cell receptor alpha variable 20; T cell receptor alpha joining 17; T cell receptor delta   |
| 16896561 | 2.73 | 5.98 | 1.26 | 1.36 | -9.54  | 0.0006   | 0.008    | CYP1B1                 | cytochrome P450, family 1, subfamily B, polypeptide 1                                        |
| 16966443 | 1.48 | 5.36 | 0.56 | 0.9  | -14.68 | 2.10E-09 | 9.82E-07 | LOC105374433           | uncharacterized LOC105374433                                                                 |

# Supplemental Figure 1

A

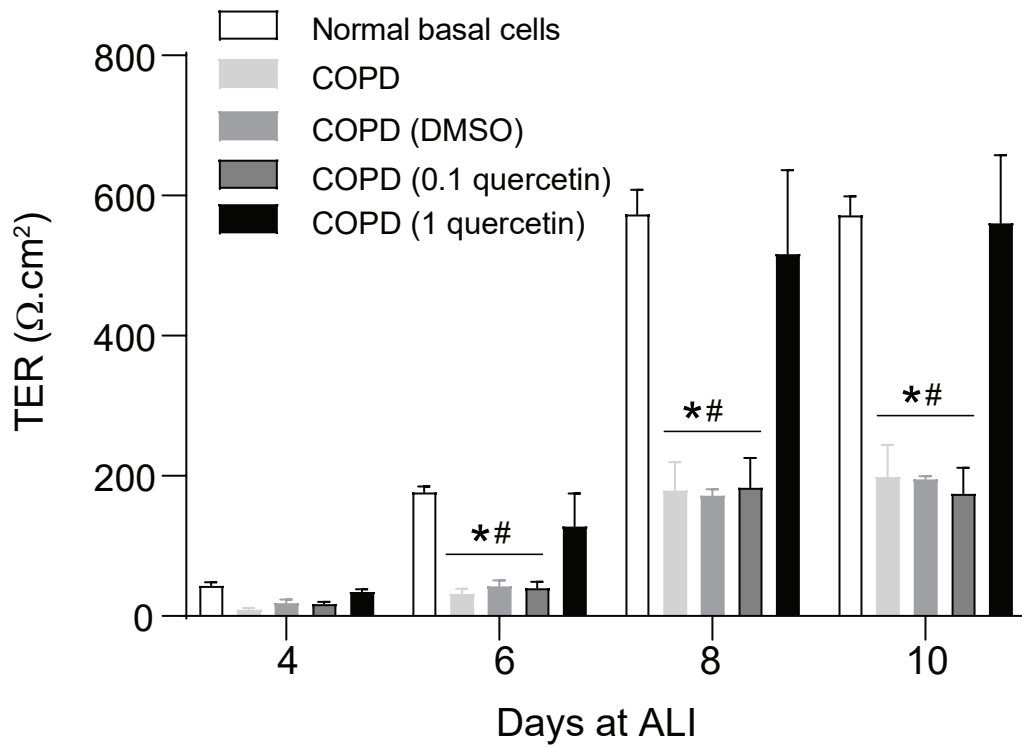

B

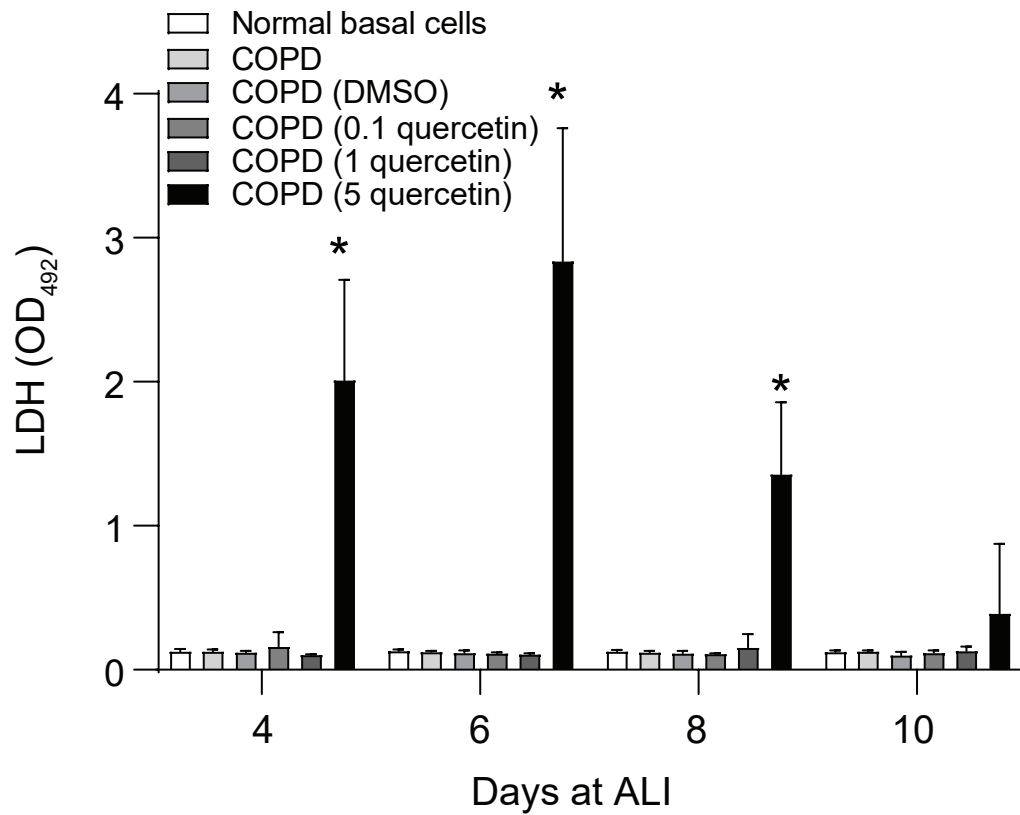



# Supplemental Figure 2

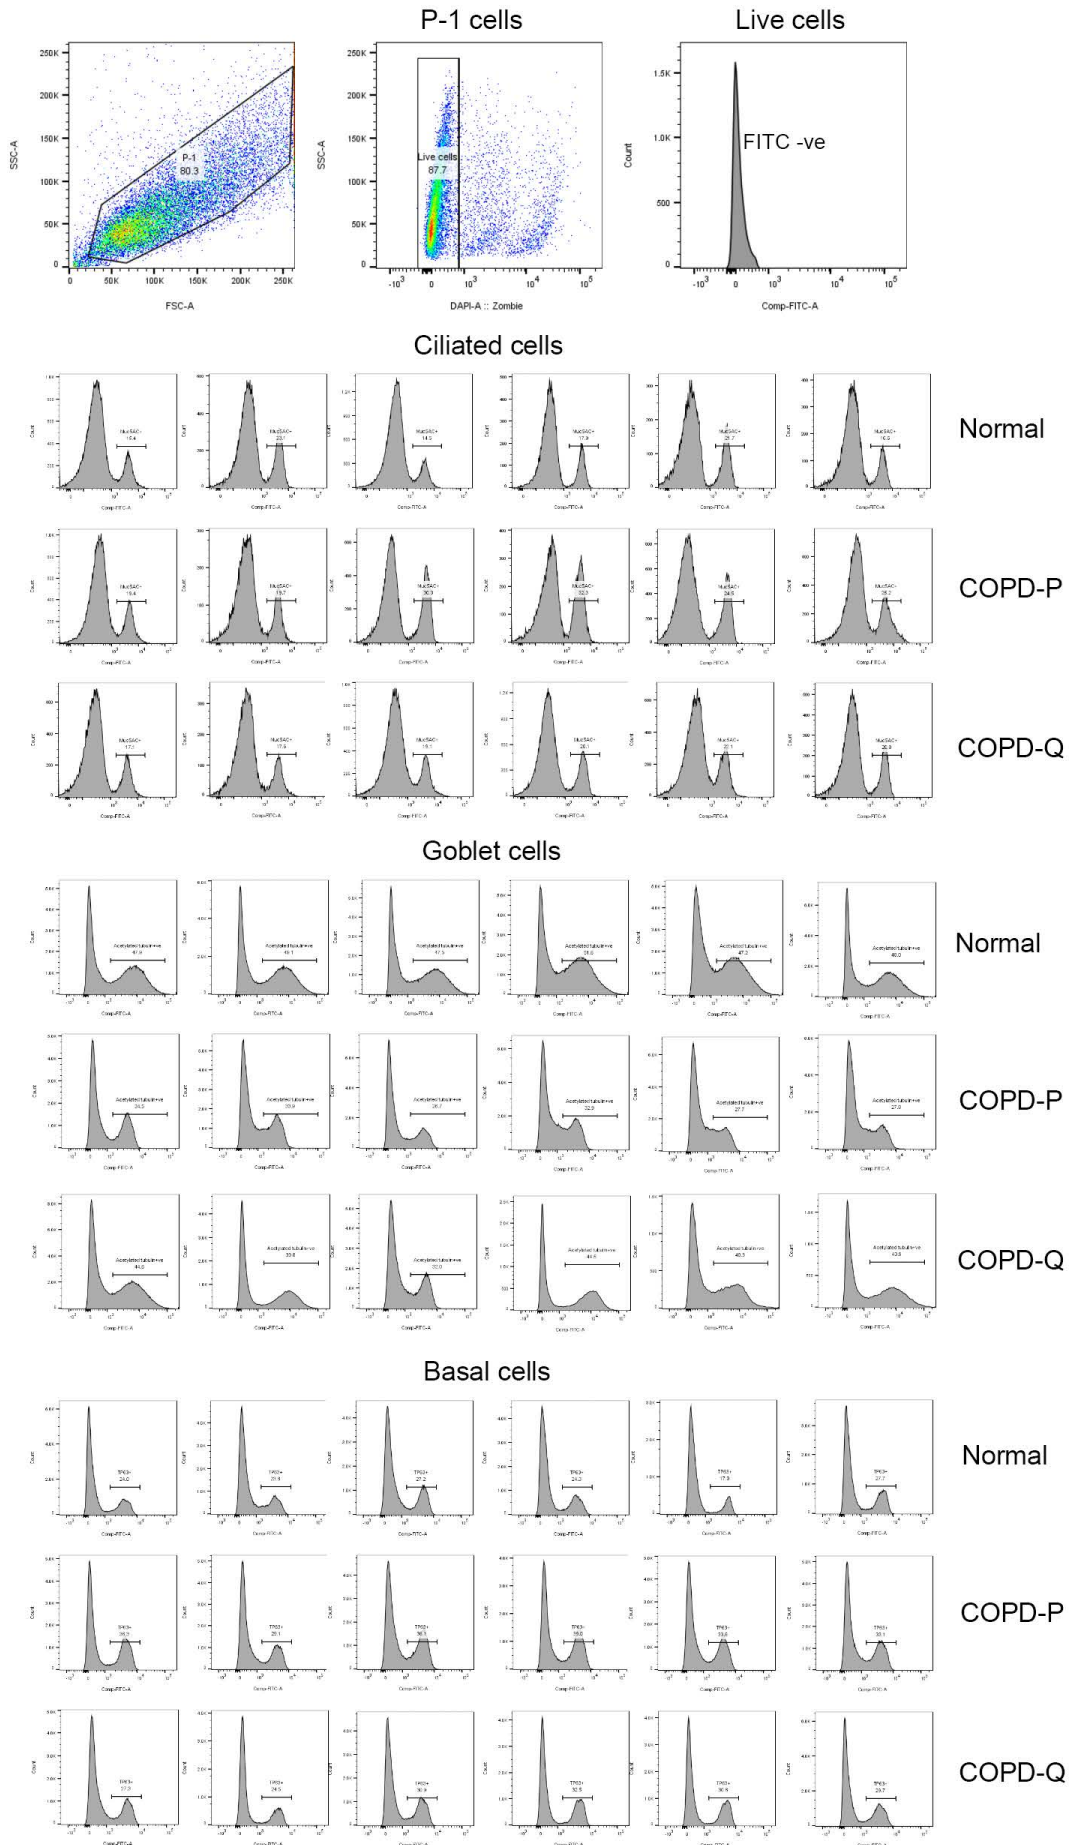

## Supplemental Figure 3

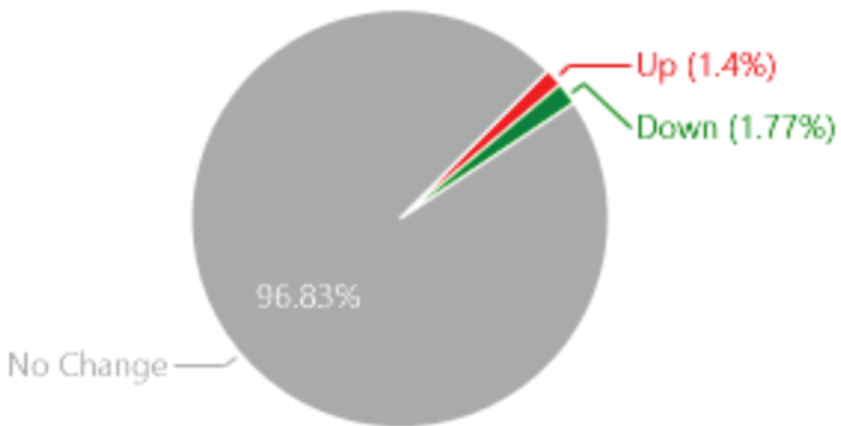

### Gene Expression Summary

Total transcripts: 48,226

Filter Criteria:

FDR P-value: <0.05

Fold Change: >2 OR <-2

Transcripts passed filter criteria: 1,527 (3.17%)

**Up-regulated: 673 (44.07%)**

**Down-regulated: 854 (55.93%)**
